# Supplementary material
Source: PubMed Central journal article supplement (PMC9175512)
Supplement: NIHMS1806669-supplement-supple_figs_tables.pdf [file NIHMS1806669-supplement-supple_figs_tables.pdf]

## Supplementary Methods

### **Intracellular cellular cytokine staining**

For cytokine staining, the collected cells were stimulated with PMA (50 ng/ml; Sigma) and ionomycin (1 mg/ml; Sigma) in the presence of Golgi Plug (BD Biosciences) for 6 h. Cells were stained with surface protein antibody followed by fixation and permeabilization and stained with APC-anti IFN- $\gamma$ . Cells were acquired and qualified by the Canto II flow cytometer (BD biosciences) and data analyzed using Diva software. Biexponential transformation was applied to display the flow cytometry data.

### **Tumor infiltrating lymphocytes (TIL) preparation**

Mouse livers were removed and minced into 1 mm<sup>3</sup> pieces. Digested with 0.125mg/ml collagenase IV and 0.2mg/ml DNase I for 30 min at 37°C. Subsequently, cellular suspensions were passed through a 200-gauge stainless steel mesh and then suspended in PBS centrifuged at 50g for 5 minutes. Supernatants containing TILs were collected and resuspended in 30% Percoll (GE Healthcare). The cell suspension was gently overlaid onto 70% Percoll and centrifuged for 30 min at 1260g. TILs were collected from the interphase and can be used for flow cytometry analysis and real-time PCR.

### **Real-time PCR for gene transcription**

Total RNA was extracted using TRIzol Reagent (Invitrogen) and one microgram total RNA was reverse transcribed. The primers used in this study were as follows: IFN- $\gamma$ : sense, 5'-CAC AGT CAT TGA AAG CCT AGA-3'; antisense, 5'-TTG CCA GTT CCT CCA GAT AT-3'; perforin: sense, 5'-CAC AGT AGA GTG TCG CAT GTA C-3'; antisense, 5'-GGA GAT GAG CCT GTG GTA AG-3'; and  $\beta$ -actin: sense, 5'- AAG ATG ACC CAG ATC ATGTTT GAG ACC-3'; antisense, 5'- AGC CAG GTC CAG ACG CAG GAT-3'.

## Supplementary Figure Legends

**Fig. S1.  $\gamma\delta$  T cell specific genes set in tumor tissues, but not non-tumor tissues, is associated with HCC prognosis in TCGA cohort.** (A) Kaplan-Meier survival analyses based on the  $\gamma\delta$  T cell gene signature in the tumor tissues of TCGA cohorts of 242 HCC cases. (B) Recurrence-free survival in 242 TCGA HCC cases described in (A). (C) Immune cytolytic activity ('CYT') was calculated based on transcript levels of two key cytolytic effectors, granzyme A (GZMA) and perforin (PRF1). (D) Comparison of KLRK1 expression level in the high risk and low risk subgroups in the HCC tumor samples based on the microarray data. (E) Comparison of DNAM-1(CD226) expression level in the high risk and low risk subgroups in the HCC tumor samples based on the microarray data. (F) Comparison of CD96 expression level in the high risk and low risk subgroups in the HCC tumor samples based on the microarray data.

**Fig. S2. Chemokines expression in the HCC tumor tissues stratified by  $\gamma\delta$  T cell gene signature predicted  $\gamma\delta$  T high-and  $\gamma\delta$  T low-subgroups in TCGA cohort.** (A) Correlation between the CCL4, CCL5, CCR5 expression and  $\gamma\delta$  T cells level in HCC tumor tissues. (B) Comparison of the expression of CCL4 and CCL5 in the two predefined subgroups.

**Fig. S3. Validation of CCL5 expression in formalin fixed, paraffin embedded tissues by immunohistochemistry.** Representative immunohistochemistry staining pattern of CCL5 in non-tumor(left) and tumor(right) tissues. Magnification power in upper panel is 100 $\times$ , the scale bar represents 100  $\mu\text{m}$ , in lower panel is 400 $\times$  and the Scale bar represents 20  $\mu\text{m}$ .

**Fig. S4. CCR5 expression in murine lymphocytes and in Hepa1-6 HCC cells.** (A) The C57BL/6 mice splenic and hepatic lymphocytes were stained by FITC-anti CD4, PE-anti CD3, Percp-anti CCR5, PE/Cy7-anti TCR  $\gamma\delta$  and APC-anti CD8. CD4<sup>+</sup>T cells were gated on CD3<sup>+</sup>CD4<sup>+</sup> group. CD8<sup>+</sup>T cells were gated on CD3<sup>+</sup>CD8<sup>+</sup>group.  $\gamma\delta$  T cells were gated on CD3<sup>+</sup>TCR  $\gamma\delta$ <sup>+</sup> group. A representative FACS histogram was used to demonstrate the CCR5 expression levels in CD4<sup>+</sup>, CD8<sup>+</sup> and  $\gamma\delta$  T lymphocytes from spleen (left panel) or liver (right panel). (B) The percentage of CCR5 expression level in CD4<sup>+</sup>, CD8<sup>+</sup> and  $\gamma\delta$  T lymphocytes from spleen (left panel) or liver (right panel). (C) A total of  $1 \times 10^6$  cultured hepa1-6 cells were harvested and lysed in RIPA to obtain total protein lysates. NuPAGE™ 4-12% Bis-Tris Protein Gel (Invitrogen, NP0336BOX) was used to separate 100  $\mu\text{g}$  of total protein. The anti-CCL4 (1:500, R&D), anti-CCL5 (1:2000, R&D) and anti- $\beta$ -actin (1:1000, CST) antibodies were used for western blot analysis. Duplicate lysates were loaded.

**Fig. S5. Effect of CCD4/5 on cellular migration of  $\gamma\delta$  T cells.** (A) Intracellular IFN- $\gamma$  expression levels on migrated and unmigrated  $\gamma\delta$  T cells in a transwell migration assay. Cells were stimulated by PMA and ionomycin in the presence of Golgi Plug for 6 h. Cells were first stained with FITC-anti CD3 and PE/Cy7-anti TCR  $\gamma\delta$  to identify  $\gamma\delta$  T cells, and then were fixed and permeabilized followed by staining with APC-anti IFN- $\gamma$  to determine intracellular IFN- $\gamma$  by flow cytometry. Representative FACS histograms were used to demonstrate the relative expression levels of IFN- $\gamma$  in  $\gamma\delta$  T cells from different treatment groups. (B) Three shRNA

sequences targeting CCL5 were designed and tested for their ability to downregulate CCL5 in Hepa1-6 cells. Hepa1-6 cells were simultaneously transfected with sh-CCL5 or scrambled sequence to knock down the CCL5 expression. Real time RT-PCR was used to detect the expression levels of CCL5.

Fig. S1

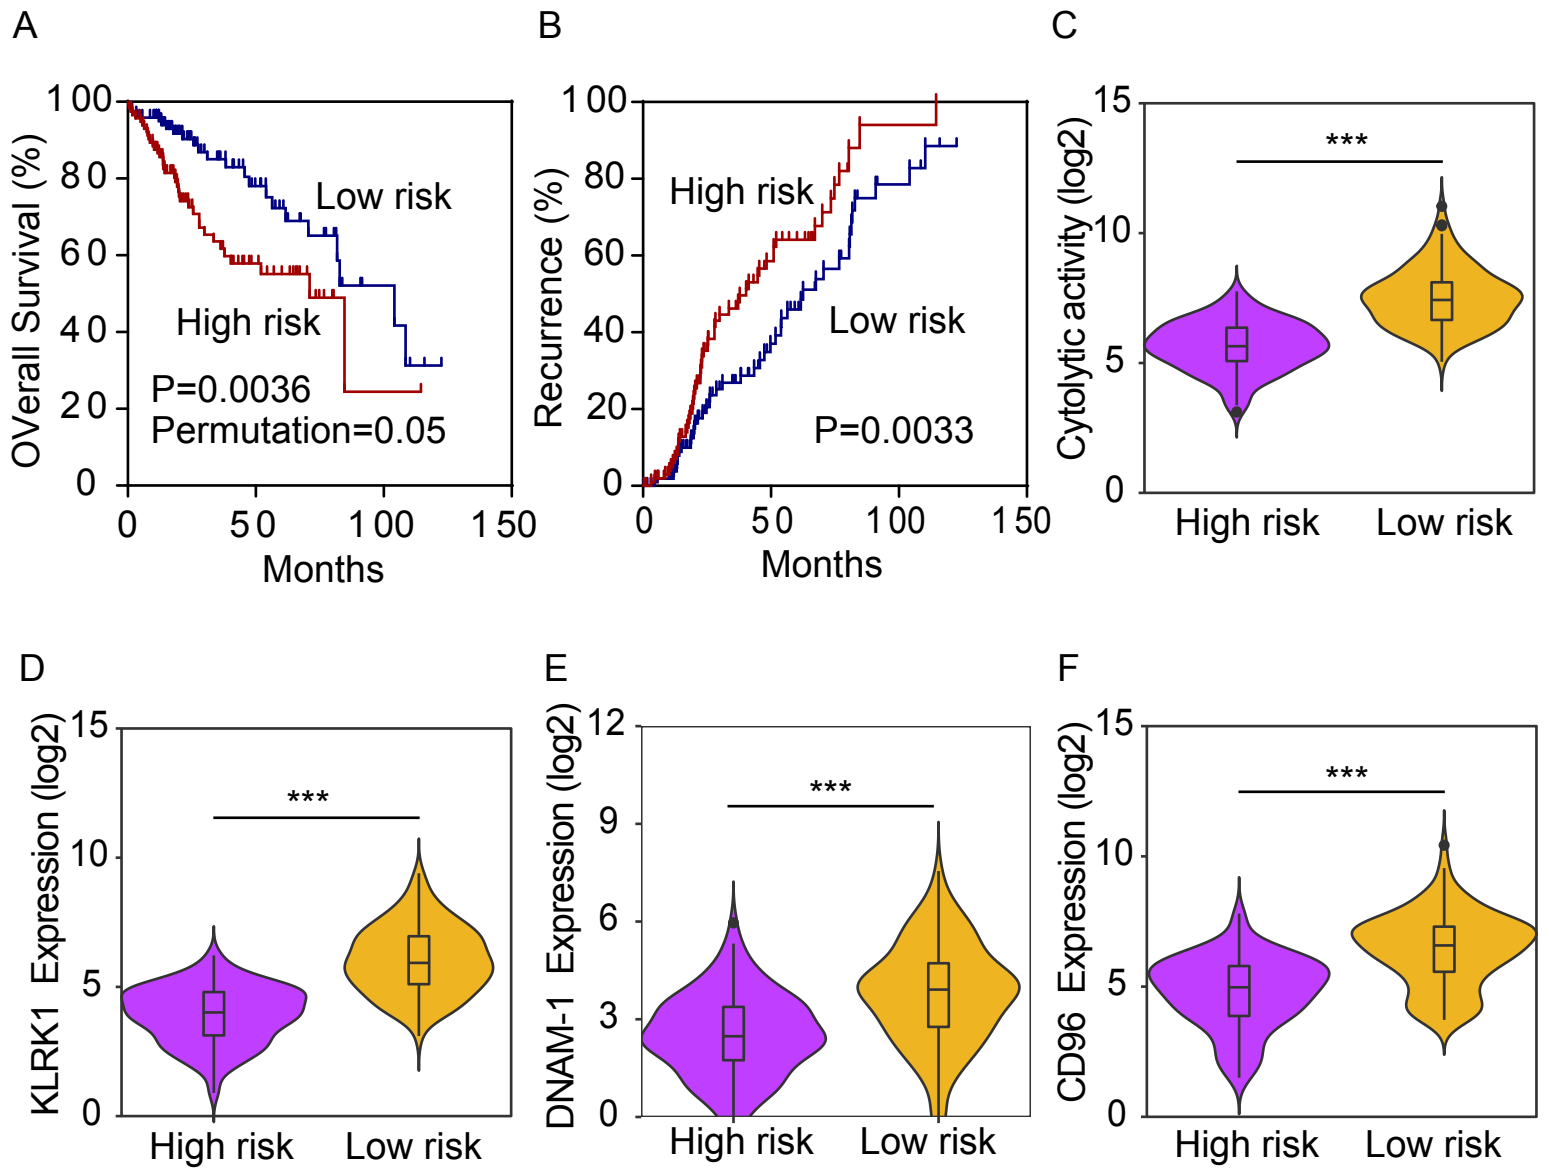

Fig. S2

A

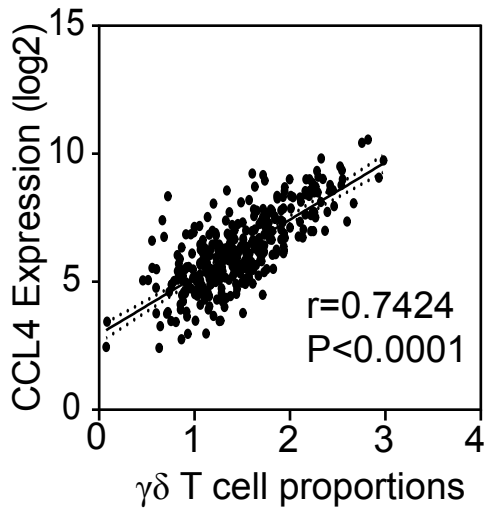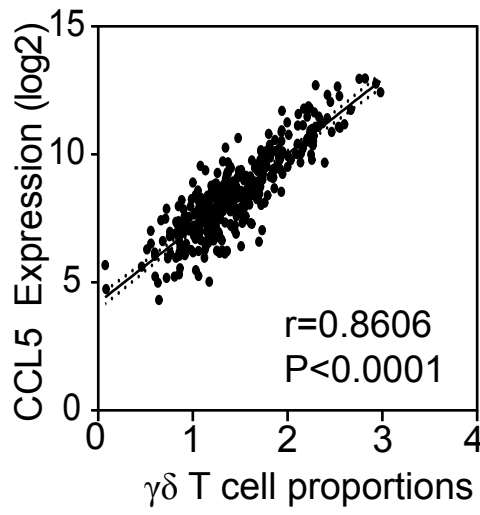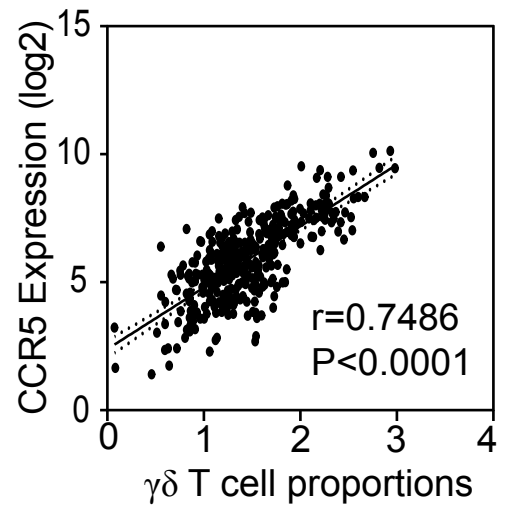

B

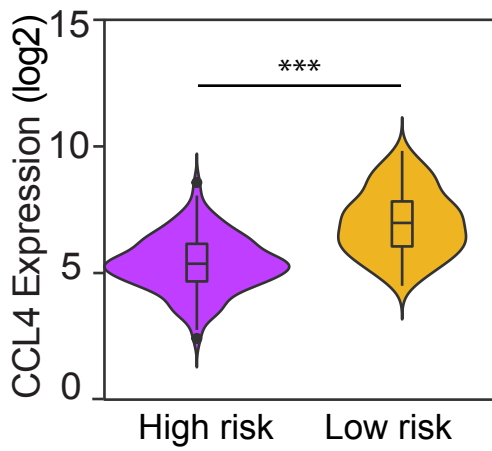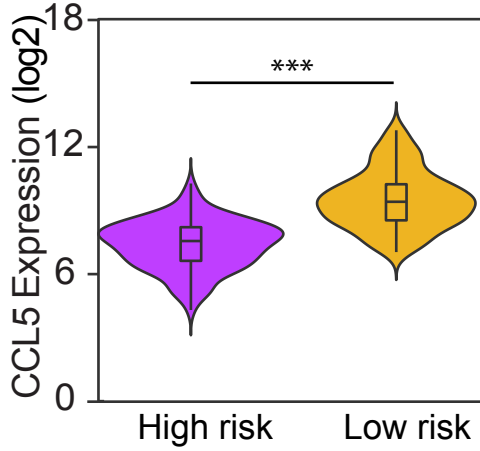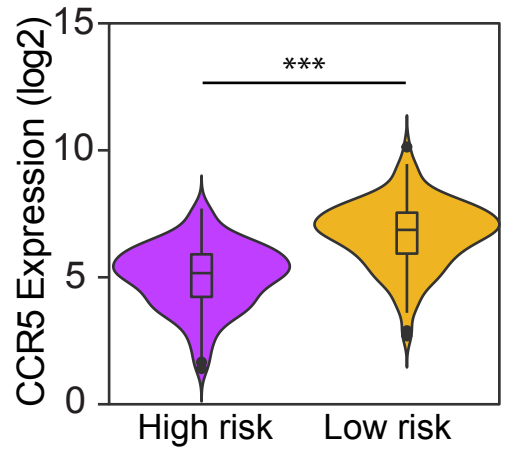

Fig. S3

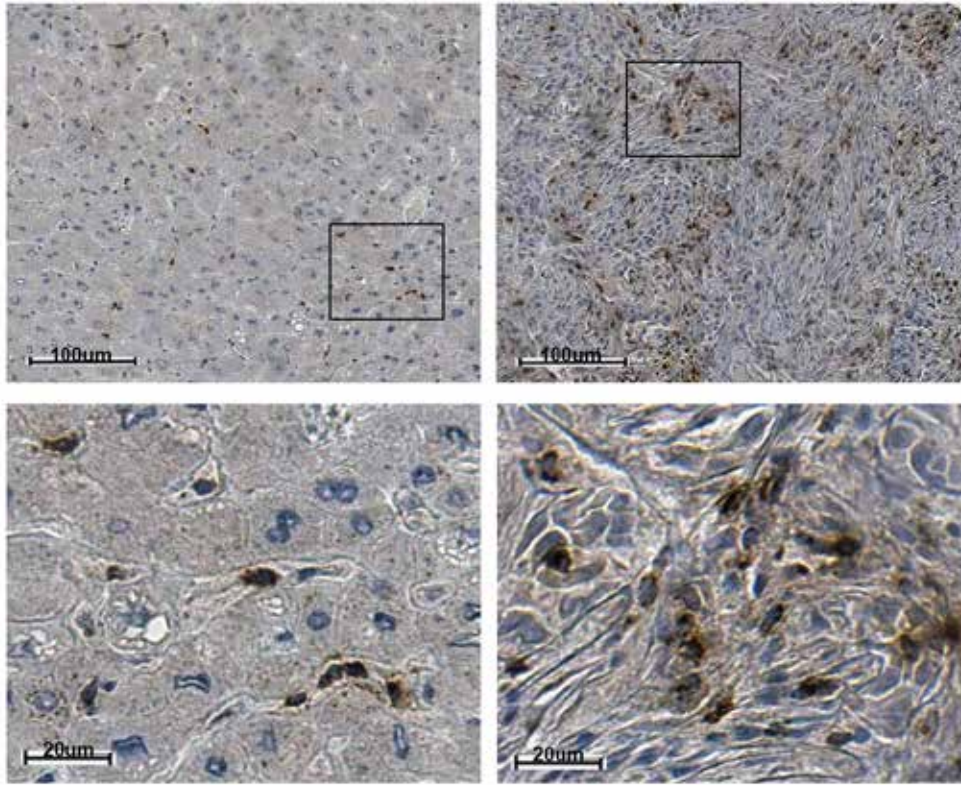

Non-Tumor

Tumor

Fig. S4

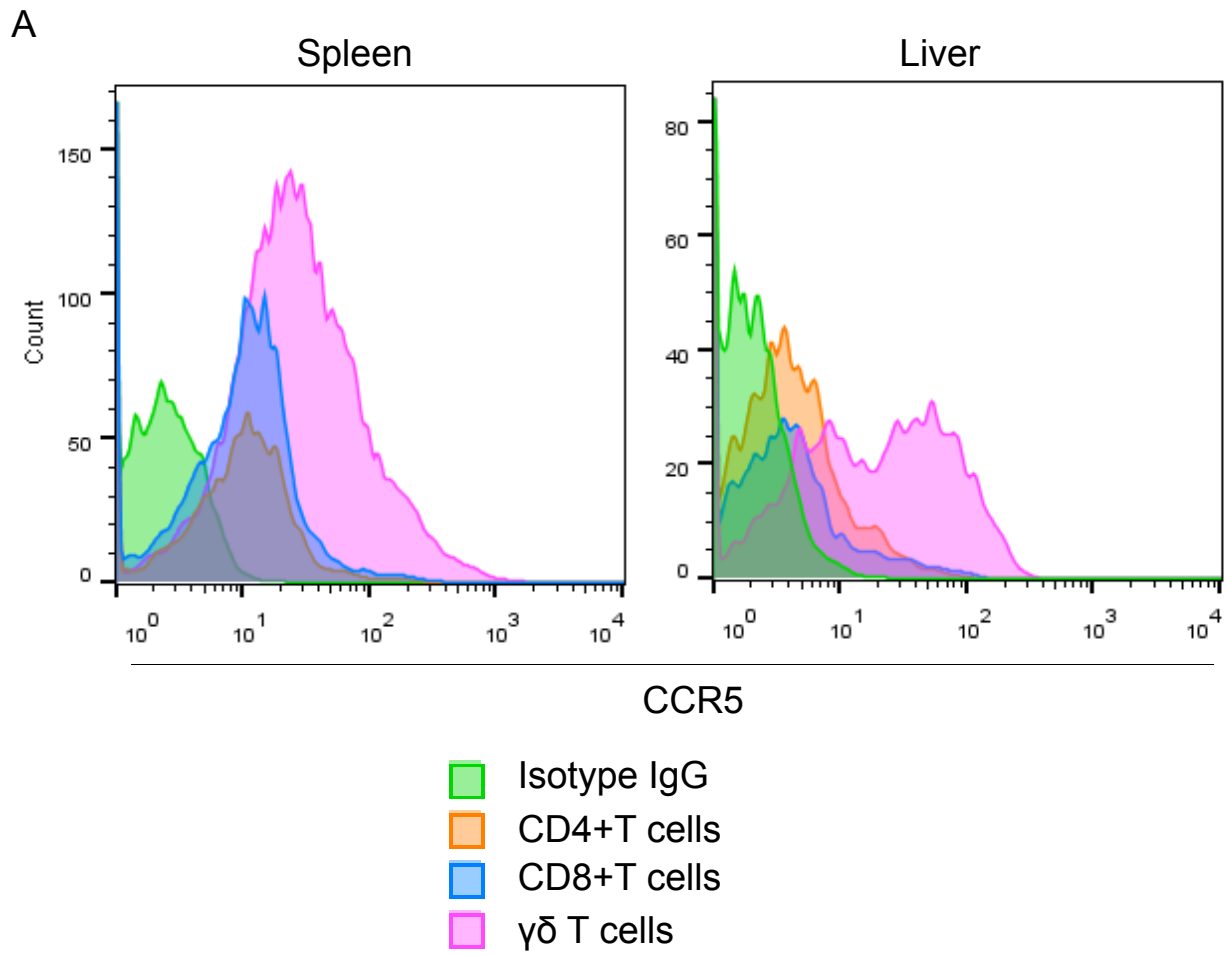

**B**

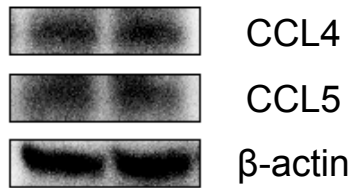

Fig. S5

A

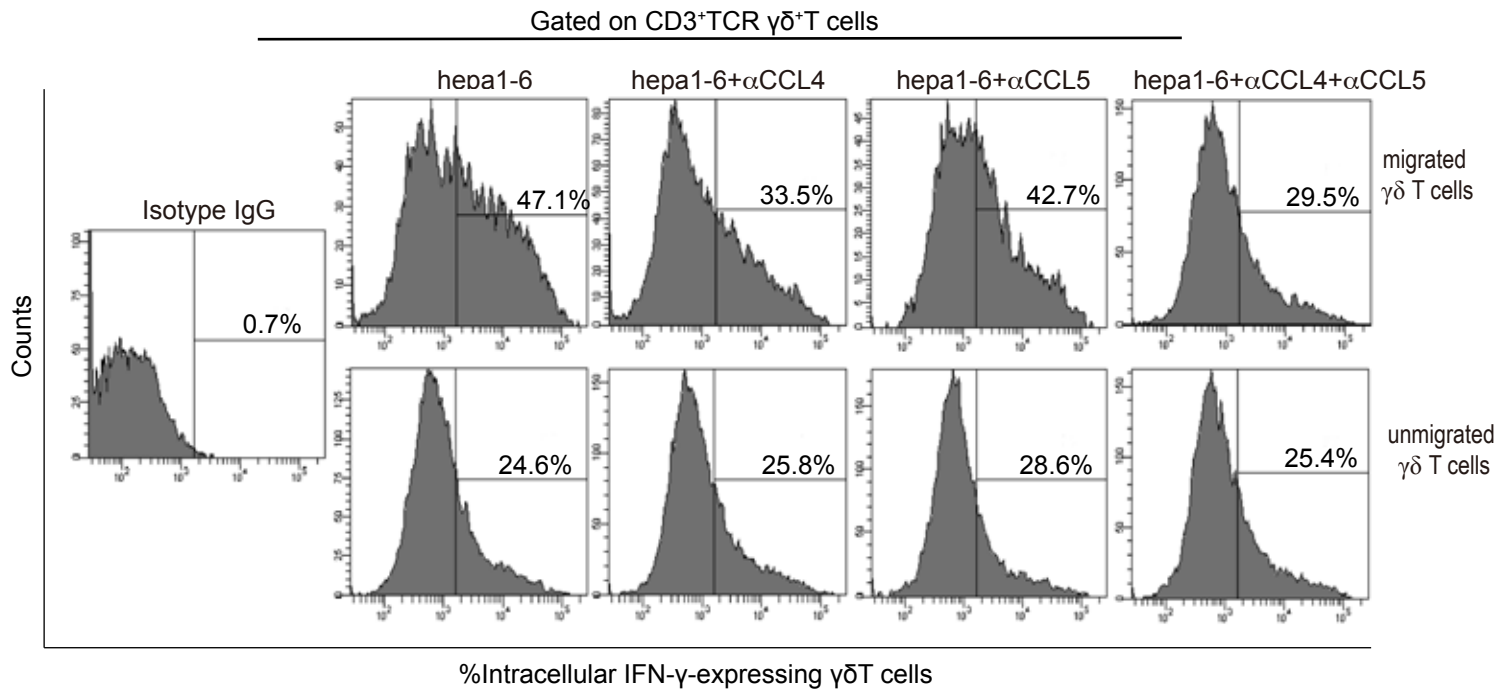

B

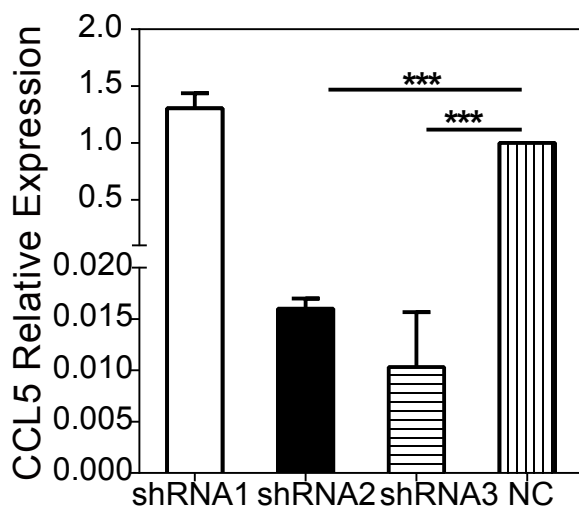



**Table S1: Clinical characteristics of patients in the LCI gene array cohort (n=240).**

| <b>Clinical variable</b>      | <b>groups</b> | <b>number</b> | <b>%</b> |
|-------------------------------|---------------|---------------|----------|
| <b>Age(yr)</b>                | >50           | 119           | 49.58    |
|                               | ≤50           | 121           | 50.42    |
| <b>Gender</b>                 | male          | 209           | 87.08    |
|                               | female        | 31            | 12.92    |
| <b>HBV viral status</b>       | AVR-CC        | 58            | 24.17    |
|                               | CC            | 158           | 65.83    |
|                               | n.a.          | 24            | 10       |
| <b>AFP(ng/ml)</b>             | ≤300          | 127           | 52.92    |
|                               | >300          | 113           | 47.08    |
| <b>CEA</b>                    | ≤3            | 135           | 56.25    |
|                               | >3            | 105           | 43.75    |
| <b>Ca19-9</b>                 | ≤37           | 152           | 63.33    |
|                               | >37           | 88            | 36.67    |
| <b>BCLC Staging</b>           | 0+A           | 171           | 71.55    |
|                               | B+C           | 52            | 21.67    |
|                               | n.a.          | 17            | 7.08     |
| <b>TNM</b>                    | I             | 97            | 40.41    |
|                               | II            | 79            | 32.92    |
|                               | III           | 51            | 21.25    |
|                               | n.a.          | 13            | 5.42     |
| <b>OKUDA</b>                  | 0             | 191           | 79.58    |
|                               | 1             | 32            | 13.33    |
|                               | n.a.          | 17            | 7.08     |
| <b>Clip stage</b>             | 0-2           | 210           | 87.5     |
|                               | 3-5           | 30            | 12.5     |
| <b>Multinodular</b>           | yes           | 51            | 21.25    |
|                               | no            | 189           | 78.75    |
| <b>Tumor size(cm)</b>         | >3            | 166           | 69.17    |
|                               | ≤3            | 73            | 30.42    |
|                               | n.a.          | 1             | 0.42     |
| <b>Microvascular invasion</b> | yes           | 88            | 36.67    |
|                               | no            | 105           | 43.75    |
|                               | n.a.          | 47            | 19.58    |
| <b>Cirrhosis</b>              | yes           | 219           | 91.25    |
|                               | no            | 21            | 8.75     |

n.a.: not available

AVR-CC: active viral replication chronic carrier

CC: chronic carrier

**Table S2: The GSEA results of the DEGs between HR and LR groups in the LCI cohort.**

| Postive DEGs enrichment results in the C2:KEGG |                                                   | SIZE | ES   | NES  | NOM p-val | FDR q-val | FWE R p-val | RANK AT MAX | LEADING EDGE                    |
|------------------------------------------------|---------------------------------------------------|------|------|------|-----------|-----------|-------------|-------------|---------------------------------|
| follow link to MSigDB                          |                                                   |      |      |      |           |           |             |             |                                 |
| 1                                              | KEGG_VIRAL_MYOCARDITIS                            | 20   | 0.68 | 3.43 | 0         | 0         | 0           | 242         | tags=90%, list=25%, signal=117% |
| 2                                              | KEGG_ALLOGRAFT_REJECTION                          | 18   | 0.72 | 3.42 | 0         | 0         | 0           | 242         | tags=94%, list=25%, signal=123% |
| 3                                              | KEGG_AUTOIMMUNE_THYROID_DISEASE                   | 18   | 0.72 | 3.37 | 0         | 0         | 0           | 242         | tags=94%, list=25%, signal=123% |
| 4                                              | KEGG_GRAFT_VERSUS_HOST_DISEASE                    | 19   | 0.68 | 3.35 | 0         | 0         | 0           | 242         | tags=89%, list=25%, signal=117% |
| 5                                              | KEGG_TYPE_I_DIABETES_MELLITUS                     | 19   | 0.68 | 3.27 | 0         | 0         | 0           | 242         | tags=89%, list=25%, signal=117% |
| 6                                              | KEGG_SYSTEMIC_LUPUS_ERYTHEMATOSUS                 | 18   | 0.67 | 3.23 | 0         | 0         | 0           | 161         | tags=78%, list=17%, signal=91%  |
| 7                                              | KEGG_CYTOKINE_CYTOKINE_RECEPTOR_INTERACTION       | 44   | 0.44 | 3.05 | 0         | 0         | 0           | 227         | tags=59%, list=23%, signal=74%  |
| 8                                              | KEGG_CHEMOKINE_SIGNALING_PATHWAY                  | 37   | 0.44 | 2.91 | 0         | 0         | 0           | 363         | tags=76%, list=37%, signal=116% |
| 9                                              | KEGG_INTESTINAL_IMMUNE_NETWORK_FOR_IGA_PRODUCTION | 18   | 0.58 | 2.79 | 0         | 0         | 0           | 251         | tags=78%, list=26%, signal=103% |
| 10                                             | KEGG_CELL_ADHESION_MOLECULES_CAMS                 | 32   | 0.46 | 2.77 | 0         | 0         | 0           | 183         | tags=56%, list=19%, signal=67%  |
| 11                                             | KEGG_ANTIGEN_PROCESSING_AND_PRESENTATION          | 26   | 0.49 | 2.75 | 0         | 0         | 0           | 161         | tags=58%, list=17%, signal=67%  |
| 12                                             | KEGG_LEISHMANIA_INFECTION                         | 19   | 0.57 | 2.74 | 0         | 0         | 0           | 181         | tags=68%, list=19%, signal=82%  |
| 13                                             | KEGG_NATURAL_KILLER_CELL_MEDIATED_CYTOTOXICITY    | 29   | 0.4  | 2.35 | 0         | 0.001     | 0.008       | 242         | tags=59%, list=25%, signal=76%  |
| 14                                             | KEGG_FC_GAMMA_R_MEDIATED_PHAGOCYTOSIS             | 19   | 0.39 | 1.93 | 0.008     | 0.014     | 0.109       | 451         | tags=84%, list=46%, signal=154% |
| 15                                             | KEGG_PRIMARY_IMMUNODEFICIENCY                     | 16   | 0.41 | 1.83 | 0.019     | 0.026     | 0.207       | 475         | tags=88%, list=49%, signal=168% |
| 16                                             | KEGG_T_CELL_RECEPTOR_SIGNALING_PATHWAY            | 26   | 0.32 | 1.81 | 0.02      | 0.026     | 0.228       | 431         | tags=73%, list=44%, signal=128% |
| 17                                             | KEGG_HEMATOPOIETIC_CELL_LINEAGE                   | 23   | 0.34 | 1.78 | 0.009     | 0.031     | 0.276       | 395         | tags=70%, list=41%, signal=114% |

| Negative DEGs enrichment results in the C2:KEGG |                 | SIZE | ES    | NES  | NOM p-val | FDR q-val | FWER p-val | RANK AT MAX | LEADING EDGE                   |
|-------------------------------------------------|-----------------|------|-------|------|-----------|-----------|------------|-------------|--------------------------------|
| follow link to MSigDB                           |                 |      |       |      |           |           |            |             |                                |
| 1                                               | KEGG_CELL_CYCLE | 23   | -0.54 | -2.9 | 0         | 0         | 0          | 233         | tags=74%, list=24%, signal=95% |

| Postive DEGs enrichment results in the C3 |                 | SIZE | ES   | NES  | NOM p-val | FDR q-val | FWER p-val | RANK AT MAX | LEADING EDGE                    |
|-------------------------------------------|-----------------|------|------|------|-----------|-----------|------------|-------------|---------------------------------|
| follow link to MSigDB                     |                 |      |      |      |           |           |            |             |                                 |
| 1                                         | RYTTCCTG_ETS2_B | 96   | 0.32 | 3.01 | 0         | 0         | 0          | 483         | tags=78%, list=50%, signal=140% |
| 2                                         | NFKAPPAB_01     | 18   | 0.49 | 2.34 | 0         | 0.023     | 0.058      | 201         | tags=61%, list=21%, signal=76%  |
| 3                                         | IRF1_01         | 26   | 0.41 | 2.32 | 0         | 0.018     | 0.064      | 197         | tags=54%, list=20%, signal=66%  |
| 4                                         | ETS1_B          | 20   | 0.45 | 2.31 | 0.002     | 0.015     | 0.072      | 508         | tags=95%, list=52%, signal=194% |
| 5                                         | ELF1_Q6         | 25   | 0.41 | 2.27 | 0         | 0.014     | 0.086      | 454         | tags=88%, list=47%, signal=161% |

| Negative DEGs enrichment results in the C3 |            | SIZE | ES    | NES   | NOM p-val | FDR q-val | FWER p-val | RANK AT MAX | LEADING EDGE                    |
|--------------------------------------------|------------|------|-------|-------|-----------|-----------|------------|-------------|---------------------------------|
| follow link to MSigDB                      |            |      |       |       |           |           |            |             |                                 |
| 1                                          | E2F4DP2_01 | 21   | -0.6  | -3.23 | 0         | 0         | 0          | 361         | tags=95%, list=37%, signal=148% |
| 2                                          | E2F4DP1_01 | 21   | -0.6  | -3.2  | 0         | 0         | 0          | 361         | tags=95%, list=37%, signal=148% |
| 3                                          | E2F1DP1_01 | 21   | -0.6  | -3.19 | 0         | 0         | 0          | 361         | tags=95%, list=37%, signal=148% |
| 4                                          | E2F_03     | 24   | -0.57 | -3.18 | 0         | 0         | 0          | 396         | tags=96%, list=41%, signal=158% |
| 5                                          | E2F1DP2_01 | 21   | -0.6  | -3.17 | 0         | 0         | 0          | 361         | tags=95%, list=37%, signal=148% |
| 6                                          | E2F_02     | 21   | -0.6  | -3.12 | 0         | 0         | 0          | 361         | tags=95%, list=37%, signal=148% |
| 7                                          | E2F_Q6     | 21   | -0.59 | -3.1  | 0         | 0         | 0          | 328         | tags=90%, list=34%, signal=133% |
| 8                                          | E2F_Q4_01  | 29   | -0.49 | -3.02 | 0         | 0         | 0          | 447         | tags=93%, list=46%, signal=167% |
| 9                                          | E2F_Q4     | 20   | -0.6  | -2.99 | 0         | 0         | 0          | 276         | tags=85%, list=28%, signal=116% |

|    |                                                  |     |       |       |   |       |       |     |                                       |
|----|--------------------------------------------------|-----|-------|-------|---|-------|-------|-----|---------------------------------------|
| 10 | RCGCANGCGY_NRF1_Q6                               | 48  | -0.38 | -2.95 | 0 | 0     | 0     | 384 | tags=75%,<br>list=39%,<br>signal=118% |
| 11 | E2F_Q6_01                                        | 26  | -0.52 | -2.94 | 0 | 0     | 0     | 410 | tags=92%,<br>list=42%,<br>signal=155% |
| 12 | TGCACTT_MIR519C_MIR519B_MIR519A                  | 21  | -0.54 | -2.94 | 0 | 0     | 0     | 410 | tags=95%,<br>list=42%,<br>signal=161% |
| 13 | E2F1DP1RB_01                                     | 20  | -0.56 | -2.89 | 0 | 0     | 0     | 228 | tags=75%,<br>list=23%,<br>signal=96%  |
| 14 | E2F1_Q6                                          | 21  | -0.55 | -2.87 | 0 | 0     | 0     | 361 | tags=90%,<br>list=37%,<br>signal=141% |
| 15 | E2F_Q3_01                                        | 25  | -0.49 | -2.84 | 0 | 0     | 0     | 334 | tags=80%,<br>list=34%,<br>signal=119% |
| 16 | ACTAYRNNNCCCR_UNKNOWN                            | 16  | -0.61 | -2.81 | 0 | 0     | 0     | 328 | tags=94%,<br>list=34%,<br>signal=139% |
| 17 | E2F1_Q4_01                                       | 25  | -0.49 | -2.77 | 0 | 0     | 0     | 334 | tags=80%,<br>list=34%,<br>signal=119% |
| 18 | SGCGSSAAA_E2F1DP2_01                             | 17  | -0.59 | -2.76 | 0 | 0     | 0     | 307 | tags=88%,<br>list=32%,<br>signal=127% |
| 19 | E2F1_Q4                                          | 22  | -0.5  | -2.71 | 0 | 0     | 0.001 | 410 | tags=91%,<br>list=42%,<br>signal=153% |
| 20 | E2F_Q3                                           | 23  | -0.47 | -2.66 | 0 | 0     | 0.002 | 410 | tags=87%,<br>list=42%,<br>signal=147% |
| 21 | E2F1_Q3                                          | 17  | -0.55 | -2.53 | 0 | 0.001 | 0.01  | 193 | tags=71%,<br>list=20%,<br>signal=86%  |
| 22 | E2F1_Q6_01                                       | 21  | -0.46 | -2.39 | 0 | 0.002 | 0.031 | 233 | tags=67%,<br>list=24%,<br>signal=86%  |
| 23 | TGCACTG_MIR148A_MIR152_MIR148B                   | 18  | -0.48 | -2.36 | 0 | 0.002 | 0.04  | 422 | tags=89%,<br>list=43%,<br>signal=154% |
| 24 | E2F1_Q3_01                                       | 20  | -0.44 | -2.32 | 0 | 0.003 | 0.058 | 328 | tags=75%,<br>list=34%,<br>signal=111% |
| 25 | GATTGGY_NFY_Q6_01                                | 66  | -0.26 | -2.29 | 0 | 0.004 | 0.076 | 285 | tags=52%,<br>list=29%,<br>signal=68%  |
| 26 | NFY_01                                           | 20  | -0.45 | -2.28 | 0 | 0.004 | 0.078 | 364 | tags=80%,<br>list=37%,<br>signal=125% |
| 27 | USF2_Q6                                          | 18  | -0.47 | -2.28 | 0 | 0.004 | 0.079 | 426 | tags=89%,<br>list=44%,<br>signal=155% |
| 28 | TGCTGCT_MIR15A_MIR16_MIR15B_MIR195_MIR424_MIR497 | 29  | -0.36 | -2.23 | 0 | 0.005 | 0.111 | 438 | tags=79%,<br>list=45%,<br>signal=140% |
| 29 | GGGCGGR_SP1_Q6                                   | 166 | -0.18 | -2.22 | 0 | 0.005 | 0.115 | 367 | tags=51%,<br>list=38%,<br>signal=68%  |

|    |                                                                                                             |    |       |       |       |       |       |     |                                       |
|----|-------------------------------------------------------------------------------------------------------------|----|-------|-------|-------|-------|-------|-----|---------------------------------------|
| 30 | CACGTG_MYC_Q2                                                                                               | 56 | -0.27 | -2.21 | 0     | 0.005 | 0.122 | 386 | tags=64%,<br>list=40%,<br>signal=100% |
| 31 | SCGGAAGY_ELK1_02                                                                                            | 46 | -0.28 | -2.14 | 0.002 | 0.009 | 0.204 | 420 | tags=70%,<br>list=43%,<br>signal=117% |
| 32 | YGCGYRCGC_UNKNOWN                                                                                           | 21 | -0.41 | -2.12 | 0.004 | 0.011 | 0.234 | 365 | tags=76%,<br>list=37%,<br>signal=119% |
| 33 | NRF1_Q6                                                                                                     | 15 | -0.46 | -2.11 | 0.002 | 0.011 | 0.244 | 408 | tags=87%,<br>list=42%,<br>signal=147% |
| 34 | ACTGTGA_MIR27A_MIR27B                                                                                       | 26 | -0.36 | -2.07 | 0.002 | 0.014 | 0.306 | 420 | tags=77%,<br>list=43%,<br>signal=132% |
| 35 | CACTGCC_MIR34A_MIR34C_MIR449                                                                                | 27 | -0.35 | -2.04 | 0.007 | 0.016 | 0.37  | 249 | tags=56%,<br>list=26%,<br>signal=73%  |
| 36 | GCACTTT_MIR175P_MIR20A_MIR106A_MIR106B_MIR20B_MIR519D                                                       | 36 | -0.31 | -2.03 | 0.005 | 0.017 | 0.395 | 155 | tags=42%,<br>list=16%,<br>signal=48%  |
| 37 | HLF_01                                                                                                      | 17 | -0.41 | -1.95 | 0.007 | 0.026 | 0.536 | 227 | tags=59%,<br>list=23%,<br>signal=75%  |
| 38 | TGTTTAC_MIR30A5P_MIR30C_MIR30D_MIR30B_MIR30E5P                                                              | 33 | -0.3  | -1.92 | 0.004 | 0.031 | 0.604 | 438 | tags=73%,<br>list=45%,<br>signal=128% |
| 39 | ALPHACP1_01                                                                                                 | 18 | -0.38 | -1.89 | 0.006 | 0.037 | 0.695 | 364 | tags=72%,<br>list=37%,<br>signal=113% |
| 40 | AGCACTT_MIR93_MIR302A_MIR302B_MIR302C_MIR302D_MIR372_MIR373_MIR520E_MIR520A_MIR526B_MIR520B_MIR520C_MIR520D | 22 | -0.35 | -1.86 | 0.013 | 0.042 | 0.747 | 155 | tags=45%,<br>list=16%,<br>signal=53%  |

| <b>Postive DEGs enrichment results in the C5</b> |                                                 | <b>SIZE</b> | <b>ES</b> | <b>NES</b> | <b>NOM p-val</b> | <b>FDR q-val</b> | <b>FWER p-val</b> | <b>RANK AT MAX</b> | <b>LEADING EDGE</b>                   |
|--------------------------------------------------|-------------------------------------------------|-------------|-----------|------------|------------------|------------------|-------------------|--------------------|---------------------------------------|
| <b>follow link to MSigDB</b>                     |                                                 |             |           |            |                  |                  |                   |                    |                                       |
| 1                                                | GO_IMMUNE_RESPONSE                              | 190         | 0.469     | 5.6165     | 0                | 0                | 0                 | 403                | tags=76%,<br>list=41%,<br>signal=105% |
| 2                                                | GO_IMMUNE_SYSTEM_PROCESS                        | 281         | 0.4       | 5.1638     | 0                | 0                | 0                 | 405                | tags=68%,<br>list=42%,<br>signal=82%  |
| 3                                                | GO_DEFENSE_RESPONSE                             | 172         | 0.442     | 4.9851     | 0                | 0                | 0                 | 401                | tags=75%,<br>list=41%,<br>signal=105% |
| 4                                                | GO_CYTOKINE_MEDIATED_SIGNALLING_PATHWAY         | 76          | 0.52      | 4.5599     | 0                | 0                | 0                 | 251                | tags=68%,<br>list=26%,<br>signal=85%  |
| 5                                                | GO_REGULATION_OF_IMMUNE_RESPONSE                | 153         | 0.394     | 4.3851     | 0                | 0                | 0                 | 551                | tags=89%,<br>list=57%,<br>signal=173% |
| 6                                                | GO_REGULATION_OF_IMMUNE_SYSTEM_PROCESS          | 220         | 0.357     | 4.3749     | 0                | 0                | 0                 | 567                | tags=85%,<br>list=58%,<br>signal=158% |
| 7                                                | GO_POSITIVE_REGULATION_OF_IMMUNE_SYSTEM_PROCESS | 166         | 0.366     | 4.1129     | 0                | 0                | 0                 | 370                | tags=64%,<br>list=38%,<br>signal=86%  |

|    |                                                                       |     |       |        |   |   |   |     |                                       |
|----|-----------------------------------------------------------------------|-----|-------|--------|---|---|---|-----|---------------------------------------|
| 8  | GO_INNATE_IMMUNE_RESPONSE                                             | 103 | 0.416 | 4.0447 | 0 | 0 | 0 | 400 | tags=75%,<br>list=41%,<br>signal=113% |
| 9  | GO_CELLULAR_RESPONSE_TO_CYTOKINE_STIMULUS                             | 100 | 0.424 | 4.0212 | 0 | 0 | 0 | 284 | tags=62%,<br>list=29%,<br>signal=79%  |
| 10 | GO_IMMUNE_EFFECTOR_PROCESSES                                          | 94  | 0.43  | 4.0168 | 0 | 0 | 0 | 380 | tags=73%,<br>list=39%,<br>signal=109% |
| 11 | GO_RESPONSE_TO_CYTOKINE                                               | 108 | 0.403 | 3.9755 | 0 | 0 | 0 | 242 | tags=56%,<br>list=25%,<br>signal=66%  |
| 12 | GO_REGULATION_OF_CELL_ACTIVATION                                      | 100 | 0.394 | 3.8886 | 0 | 0 | 0 | 487 | tags=84%,<br>list=50%,<br>signal=151% |
| 13 | GO_RESPONSE_TO_INTERFERON_GAMMA                                       | 35  | 0.614 | 3.847  | 0 | 0 | 0 | 242 | tags=80%,<br>list=25%,<br>signal=103% |
| 14 | GO_POSITIVE_REGULATION_OF_RESPONSE_TO_STIMULUS                        | 228 | 0.312 | 3.8438 | 0 | 0 | 0 | 392 | tags=61%,<br>list=40%,<br>signal=79%  |
| 15 | GO_ACTIVATION_OF_IMMUNE_RESPONSE                                      | 91  | 0.41  | 3.811  | 0 | 0 | 0 | 392 | tags=74%,<br>list=40%,<br>signal=112% |
| 16 | GO_POSITIVE_REGULATION_OF_IMMUNE_RESPONSE                             | 113 | 0.381 | 3.8033 | 0 | 0 | 0 | 392 | tags=70%,<br>list=40%,<br>signal=103% |
| 17 | GO_CELLULAR_RESPONSE_TO_INTERFERON_GAMMA                              | 32  | 0.624 | 3.7903 | 0 | 0 | 0 | 242 | tags=81%,<br>list=25%,<br>signal=105% |
| 18 | GO_INFLAMMATORY_RESPONSE                                              | 76  | 0.443 | 3.7894 | 0 | 0 | 0 | 514 | tags=95%,<br>list=53%,<br>signal=185% |
| 19 | GO_IMMUNE_RESPONSE_REGULATING_CELL_SURFACE_RECEPTOR_SIGNALING_PATHWAY | 70  | 0.436 | 3.6751 | 0 | 0 | 0 | 367 | tags=74%,<br>list=38%,<br>signal=111% |
| 20 | GO_REGULATION_OF_CELL_CELL_ADHESION                                   | 81  | 0.408 | 3.6283 | 0 | 0 | 0 | 465 | tags=84%,<br>list=48%,<br>signal=147% |
| 21 | GO_REGULATION_OF_HOMOTYPIC_CELL_CELL_ADHESION                         | 71  | 0.422 | 3.5936 | 0 | 0 | 0 | 465 | tags=86%,<br>list=48%,<br>signal=152% |
| 22 | GO_ADAPTIVE_IMMUNE_RESPONSE                                           | 72  | 0.417 | 3.5713 | 0 | 0 | 0 | 561 | tags=96%,<br>list=58%,<br>signal=209% |
| 23 | GO_RESPONSE_TO_BIOTIC_STIMULUS                                        | 111 | 0.359 | 3.5621 | 0 | 0 | 0 | 521 | tags=84%,<br>list=53%,<br>signal=160% |
| 24 | GO_POSITIVE_REGULATION_OF_CELL_ACTIVATION                             | 81  | 0.392 | 3.5364 | 0 | 0 | 0 | 362 | tags=69%,<br>list=37%,<br>signal=101% |
| 25 | GO_SIDE_OF_MEMBRANE                                                   | 75  | 0.394 | 3.4837 | 0 | 0 | 0 | 294 | tags=60%,<br>list=30%,<br>signal=79%  |
| 26 | GO_ANTIGEN_RECEPTOR_MEDIATED_SIGNALING_PATHWAY                        | 51  | 0.469 | 3.4613 | 0 | 0 | 0 | 367 | tags=78%,<br>list=38%,<br>signal=119% |
| 27 | GO_RESPONSE_TO_EXTERNAL_STIMULUS                                      | 187 | 0.284 | 3.4114 | 0 | 0 | 0 | 473 | tags=70%,<br>list=49%,<br>signal=110% |

|    |                                                         |     |       |        |   |   |   |     |                                        |
|----|---------------------------------------------------------|-----|-------|--------|---|---|---|-----|----------------------------------------|
| 28 | GO_ANTIGEN_BINDING                                      | 33  | 0.55  | 3.41   | 0 | 0 | 0 | 161 | tags=61%,<br>list=17%,<br>signal=70%   |
| 29 | GO_REGULATION_OF_CELL_ADHESION                          | 105 | 0.344 | 3.3811 | 0 | 0 | 0 | 465 | tags=77%,<br>list=48%,<br>signal=132%  |
| 30 | GO_RESPONSE_TO_BACTERIUM                                | 66  | 0.402 | 3.358  | 0 | 0 | 0 | 521 | tags=91%,<br>list=53%,<br>signal=182%  |
| 31 | GO_CELL_CHEMOTAXIS                                      | 37  | 0.509 | 3.3411 | 0 | 0 | 0 | 451 | tags=95%,<br>list=46%,<br>signal=169%  |
| 32 | GO_REGULATION_OF_LEUKOCYTE_PROLIFERATION                | 43  | 0.485 | 3.3192 | 0 | 0 | 0 | 389 | tags=84%,<br>list=40%,<br>signal=133%  |
| 33 | GO_T_CELL_RECEPTOR_SIGNALING_PATHWAY                    | 36  | 0.506 | 3.2995 | 0 | 0 | 0 | 386 | tags=86%,<br>list=40%,<br>signal=137%  |
| 34 | GO_SIGNALING_RECEPTOR_ACTIVITY                          | 100 | 0.337 | 3.2908 | 0 | 0 | 0 | 545 | tags=86%,<br>list=56%,<br>signal=175%  |
| 35 | GO_MHC_PROTEIN_COMPLEX                                  | 15  | 0.762 | 3.2703 | 0 | 0 | 0 | 242 | tags=100%,<br>list=25%,<br>signal=131% |
| 36 | GO_EXTRACELLULAR_SPACE                                  | 93  | 0.345 | 3.262  | 0 | 0 | 0 | 415 | tags=71%,<br>list=43%,<br>signal=112%  |
| 37 | GO_RESPONSE_TO_VIRUS                                    | 42  | 0.463 | 3.2268 | 0 | 0 | 0 | 243 | tags=62%,<br>list=25%,<br>signal=79%   |
| 38 | GO_LEUKOCYTE_ACTIVATION                                 | 88  | 0.348 | 3.2232 | 0 | 0 | 0 | 556 | tags=89%,<br>list=57%,<br>signal=188%  |
| 39 | GO_POSITIVE_REGULATION_OF_CELL_CELL_ADHESION            | 63  | 0.402 | 3.1982 | 0 | 0 | 0 | 362 | tags=71%,<br>list=37%,<br>signal=106%  |
| 40 | GO_RECEPTOR_ACTIVITY                                    | 121 | 0.317 | 3.1897 | 0 | 0 | 0 | 558 | tags=85%,<br>list=57%,<br>signal=175%  |
| 41 | GO_LEUKOCYTE_MIGRATION                                  | 54  | 0.416 | 3.1618 | 0 | 0 | 0 | 374 | tags=74%,<br>list=38%,<br>signal=114%  |
| 42 | GO_HUMORAL_IMMUNE_RESPONSE                              | 29  | 0.531 | 3.1483 | 0 | 0 | 0 | 161 | tags=59%,<br>list=17%,<br>signal=68%   |
| 43 | GO_BIOLOGICAL_ADHESION                                  | 118 | 0.308 | 3.1384 | 0 | 0 | 0 | 551 | tags=85%,<br>list=57%,<br>signal=171%  |
| 44 | GO_CHEMOKINE_RECEPTOR_BINDING                           | 16  | 0.675 | 3.1372 | 0 | 0 | 0 | 195 | tags=81%,<br>list=20%,<br>signal=100%  |
| 45 | GO_REGULATION_OF_RESPONSE_TO_EXTERNAL_STIMULUS          | 100 | 0.324 | 3.0977 | 0 | 0 | 0 | 403 | tags=68%,<br>list=41%,<br>signal=104%  |
| 46 | GO_SIGNAL_TRANSDUCER_ACTIVITY                           | 136 | 0.285 | 3.0737 | 0 | 0 | 0 | 514 | tags=76%,<br>list=53%,<br>signal=139%  |
| 47 | GO_POSITIVE_REGULATION_OF_RESPONSE_TO_EXTERNAL_STIMULUS | 46  | 0.43  | 3.0582 | 0 | 0 | 0 | 387 | tags=78%,<br>list=40%,<br>signal=124%  |

|    |                                                                                              |     |       |        |   |   |   |     |                                       |
|----|----------------------------------------------------------------------------------------------|-----|-------|--------|---|---|---|-----|---------------------------------------|
| 48 | GO_DEFENSE_RESPONSE_TO_OTHER_ORGANISM                                                        | 56  | 0.392 | 3.056  | 0 | 0 | 0 | 400 | tags=73%,<br>list=41%,<br>signal=117% |
| 49 | GO_SINGLE_ORGANISM_CELL_ADHESION                                                             | 77  | 0.343 | 3.0536 | 0 | 0 | 0 | 454 | tags=78%,<br>list=47%,<br>signal=134% |
| 50 | GO_CELL_ACTIVATION                                                                           | 107 | 0.316 | 3.0494 | 0 | 0 | 0 | 556 | tags=85%,<br>list=57%,<br>signal=176% |
| 51 | GO_ENDOCYTOSIS                                                                               | 63  | 0.376 | 3.0311 | 0 | 0 | 0 | 343 | tags=67%,<br>list=35%,<br>signal=96%  |
| 52 | GO_INTERFERON_GAMMA_MEDIATED_SIGNALING_PATHWAY                                               | 22  | 0.588 | 3.0259 | 0 | 0 | 0 | 242 | tags=77%,<br>list=25%,<br>signal=100% |
| 53 | GO_LYMPHOCYTE_MEDIATED_IMMUNITY                                                              | 31  | 0.503 | 3.0231 | 0 | 0 | 0 | 254 | tags=68%,<br>list=26%,<br>signal=89%  |
| 54 | GO_POSITIVE_REGULATION_OF_CELL_ADHESION                                                      | 78  | 0.345 | 3.0112 | 0 | 0 | 0 | 349 | tags=64%,<br>list=36%,<br>signal=92%  |
| 55 | GO_INTRINSIC_COMPONENT_OF_PLASMA_MEMBRANE                                                    | 139 | 0.279 | 3.009  | 0 | 0 | 0 | 551 | tags=81%,<br>list=57%,<br>signal=160% |
| 56 | GO_LYMPHOCYTE_COSTIMULATION                                                                  | 25  | 0.553 | 3.005  | 0 | 0 | 0 | 259 | tags=76%,<br>list=27%,<br>signal=101% |
| 57 | GO_ANTIGEN_PROCESSING_AND_PRESENTATION_OF_PEPTIDE_OR_POLYSACCHARIDE_ANTIGEN_VIA_MHC_CLASS_II | 17  | 0.648 | 2.9933 | 0 | 0 | 0 | 161 | tags=75%,<br>list=47%,<br>signal=90%  |
| 58 | GO_POSITIVE_REGULATION_OF_INTRACELLULAR_SIGNAL_TRANSDUCTION                                  | 88  | 0.322 | 2.9906 | 0 | 0 | 0 | 462 | tags=76%,<br>list=17%,<br>signal=90%  |
| 59 | GO_LEUKOCYTE_CHEMOTAXIS                                                                      | 29  | 0.515 | 2.9811 | 0 | 0 | 0 | 374 | tags=75%,<br>list=47%,<br>signal=130% |
| 60 | GO_LEUKOCYTE_MEDIATED_IMMUNITY                                                               | 34  | 0.479 | 2.9772 | 0 | 0 | 0 | 367 | tags=86%,<br>list=38%,<br>signal=136% |
| 61 | GO_CELL_SURFACE                                                                              | 95  | 0.314 | 2.96   | 0 | 0 | 0 | 289 | tags=79%,<br>list=38%,<br>signal=123% |
| 62 | GO_LEUKOCYTE_CELL_CELL_ADHESION                                                              | 59  | 0.375 | 2.96   | 0 | 0 | 0 | 477 | tags=53%,<br>list=30%,<br>signal=68%  |
| 63 | GO_CELL_CELL_ADHESION                                                                        | 78  | 0.334 | 2.9379 | 0 | 0 | 0 | 477 | tags=83%,<br>list=49%,<br>signal=153% |
| 64 | GO_REGULATION_OF_LEUKOCYTE_CHEMOTAXIS                                                        | 31  | 0.491 | 2.9359 | 0 | 0 | 0 | 222 | tags=79%,<br>list=49%,<br>signal=143% |
| 65 | GO_POSITIVE_REGULATION_OF_LEUKOCYTE_CHEMOTAXIS                                               | 28  | 0.506 | 2.9349 | 0 | 0 | 0 | 144 | tags=65%,<br>list=23%,<br>signal=81%  |
| 66 | GO_REGULATION_OF_T_CELL_PROLIFERATION                                                        | 32  | 0.493 | 2.9307 | 0 | 0 | 0 | 386 | tags=57%,<br>list=15%,<br>signal=65%  |
| 67 | GO_RESPONSE_TO_MOLECULE_OF_BACTERIAL_ORIGIN                                                  | 44  | 0.414 | 2.9254 | 0 | 0 | 0 | 521 | tags=84%,<br>list=40%,<br>signal=135% |



|    |                                                                                                                              |    |       |        |       |       |       |     |                                 |
|----|------------------------------------------------------------------------------------------------------------------------------|----|-------|--------|-------|-------|-------|-----|---------------------------------|
| 68 | GO_EXTERNAL_SIDE_OF_PLASMA_MEMBRANE                                                                                          | 51 | 0.393 | 2.9104 | 0     | 0     | 0     | 283 | tags=59%, list=29%, signal=79%  |
| 69 | GO_ANTIGEN_PROCESSING_AND_PRESENTATION_OF_PEPTIDE_ANTIGEN                                                                    | 29 | 0.494 | 2.8993 | 0     | 0     | 0     | 161 | tags=59%, list=17%, signal=68%  |
| 70 | GO_LYMPHOCYTE_ACTIVATION                                                                                                     | 79 | 0.33  | 2.8973 | 0     | 0     | 0     | 556 | tags=87%, list=57%, signal=187% |
| 71 | GO_REGULATION_OF_CHEMOTAXIS                                                                                                  | 35 | 0.452 | 2.8833 | 0     | ##### | 0.002 | 291 | tags=69%, list=30%, signal=94%  |
| 72 | GO_ANTIGEN_PROCESSING_AND_PRESENTATION                                                                                       | 32 | 0.478 | 2.8735 | 0     | ##### | 0.002 | 161 | tags=56%, list=17%, signal=65%  |
| 73 | GO_DEFENSE_RESPONSE_TO_VIRUS                                                                                                 | 28 | 0.511 | 2.8629 | 0     | ##### | 0.002 | 243 | tags=68%, list=25%, signal=88%  |
| 74 | GO_ADAPTIVE_IMMUNE_RESPONSE_BASED_ON_SOMATIC_RECOMBINATION_OF_IMMUNE_RECEPTORS_BUILT_FROM_IMMUNOGLOBULIN_SUPERFAMILY_DOMAINS | 32 | 0.476 | 2.8601 | 0     | ##### | 0.002 | 166 | tags=53%, list=17%, signal=62%  |
| 75 | GO_CYTOKINE_ACTIVITY                                                                                                         | 23 | 0.529 | 2.8591 | 0     | ##### | 0.002 | 195 | tags=65%, list=20%, signal=80%  |
| 76 | GO_G_PROTEIN_COUPLED_RECEPTOR_SIGNALING_PATHWAY                                                                              | 58 | 0.375 | 2.8564 | 0     | ##### | 0.002 | 514 | tags=88%, list=53%, signal=175% |
| 77 | GO_POSITIVE_REGULATION_OF_CHEMOTAXIS                                                                                         | 29 | 0.489 | 2.8228 | 0     | ##### | 0.003 | 144 | tags=55%, list=15%, signal=63%  |
| 78 | GO_REGULATION_OF_LEUKOCYTE_APOPTOTIC_PROCESS                                                                                 | 19 | 0.568 | 2.7898 | 0     | ##### | 0.006 | 348 | tags=89%, list=36%, signal=136% |
| 79 | GO_CELL_MOTILITY                                                                                                             | 92 | 0.299 | 2.7807 | 0     | ##### | 0.007 | 462 | tags=73%, list=47%, signal=125% |
| 80 | GO_B_CELL_MEDIATED_IMMUNITY                                                                                                  | 20 | 0.557 | 2.7793 | 0     | ##### | 0.007 | 227 | tags=70%, list=23%, signal=89%  |
| 81 | GO_REGULATION_OF_LEUKOCYTE_MIGRATION                                                                                         | 39 | 0.418 | 2.7713 | 0     | ##### | 0.007 | 222 | tags=56%, list=23%, signal=70%  |
| 82 | GO_TAXIS                                                                                                                     | 62 | 0.348 | 2.7639 | 0     | ##### | 0.007 | 514 | tags=84%, list=53%, signal=166% |
| 83 | GO_POSITIVE_REGULATION_OF_LEUKOCYTE_MIGRATION                                                                                | 32 | 0.445 | 2.7453 | 0     | ##### | 0.008 | 222 | tags=59%, list=23%, signal=74%  |
| 84 | GO_CHEMOKINE_MEDIATED_SIGNALING_PATHWAY                                                                                      | 21 | 0.541 | 2.7216 | 0     | ##### | 0.011 | 207 | tags=67%, list=21%, signal=83%  |
| 85 | GO_G_PROTEIN_COUPLED_RECEPTOR_BINDING                                                                                        | 27 | 0.479 | 2.7097 | 0     | ##### | 0.014 | 232 | tags=63%, list=24%, signal=80%  |
| 86 | GO_REGULATION_OF_SEQUESTERING_OF_CALCIIUM_ION                                                                                | 16 | 0.601 | 2.699  | 0     | ##### | 0.016 | 256 | tags=81%, list=26%, signal=108% |
| 87 | GO_NEGATIVE_REGULATION_OF_MULTIOrganism PROCESS                                                                              | 15 | 0.61  | 2.6962 | 0.002 | ##### | 0.016 | 181 | tags=73%, list=19%, signal=89%  |

|     |                                                 |     |       |        |        |           |       |     |                                       |
|-----|-------------------------------------------------|-----|-------|--------|--------|-----------|-------|-----|---------------------------------------|
| 88  | GO_PHAGOCYTOSIS                                 | 37  | 0.429 | 2.685  | 0      | ####<br># | 0.018 | 370 | tags=76%,<br>list=38%,<br>signal=117% |
| 89  | GO_NEGATIVE_REGULATION_OF_CELL_ADHESION         | 30  | 0.444 | 2.6736 | 0      | ####<br># | 0.019 | 435 | tags=87%,<br>list=45%,<br>signal=152% |
| 90  | GO_T_CELL_DIFFERENTIATION                       | 32  | 0.438 | 2.6719 | 0      | ####<br># | 0.02  | 451 | tags=88%,<br>list=46%,<br>signal=158% |
| 91  | GO_RECEPTOR_BINDING                             | 128 | 0.247 | 2.6364 | 0      | ####<br># | 0.024 | 561 | tags=78%,<br>list=58%,<br>signal=160% |
| 92  | GO_GLYCOSAMINOGLYCAN_BINDING                    | 27  | 0.47  | 2.6204 | 0      | ####<br># | 0.026 | 408 | tags=85%,<br>list=42%,<br>signal=143% |
| 93  | GO_CELLULAR_RESPONSE_TO_ORGANIC_SUBSTANCE       | 195 | 0.22  | 2.6179 | 0      | ####<br># | 0.026 | 237 | tags=38%,<br>list=24%,<br>signal=40%  |
| 94  | GO_NEGATIVE_REGULATION_OF_IMMUNE_SYSTEM_PROCESS | 55  | 0.338 | 2.6145 | 0      | ####<br># | 0.027 | 526 | tags=85%,<br>list=54%,<br>signal=175% |
| 95  | GO_VESICLE_MEDIATED_TRANSPORT                   | 100 | 0.272 | 2.6079 | 0      | ####<br># | 0.028 | 343 | tags=56%,<br>list=35%,<br>signal=78%  |
| 96  | GO_POSITIVE_REGULATION_OF_T_CELL_PROLIFERATION  | 24  | 0.467 | 2.6021 | 0.0019 | ####<br># | 0.028 | 465 | tags=92%,<br>list=48%,<br>signal=171% |
| 97  | GO_NEGATIVE_REGULATION_OF_CELL_ACTIVATION       | 25  | 0.463 | 2.6018 | 0      | ####<br># | 0.028 | 435 | tags=88%,<br>list=45%,<br>signal=155% |
| 98  | GO_PLASMA_MEMBRANE_PROTEIN_COMPLEX              | 50  | 0.353 | 2.5881 | 0      | ####<br># | 0.029 | 283 | tags=58%,<br>list=29%,<br>signal=78%  |
| 99  | GO_ENDOCYTOTIC_VESICLE_MEMBRANE                 | 22  | 0.501 | 2.5859 | 0      | ####<br># | 0.03  | 161 | tags=59%,<br>list=17%,<br>signal=69%  |
| 100 | GO_NEGATIVE_REGULATION_OF_CELL_CELL_ADHESION    | 20  | 0.522 | 2.5726 | 0      | ####<br># | 0.033 | 435 | tags=95%,<br>list=45%,<br>signal=168% |
| 101 | GO_REGULATION_OF_ERK1_AND_ERK2_CASCADE          | 26  | 0.456 | 2.5623 | 0      | ####<br># | 0.039 | 348 | tags=77%,<br>list=36%,<br>signal=116% |
| 102 | GO_REGULATION_OF_CELL_PROLIFERATION             | 158 | 0.225 | 2.5612 | 0      | ####<br># | 0.039 | 456 | tags=65%,<br>list=47%,<br>signal=102% |
| 103 | GO_LYMPHOCYTE_MIGRATION                         | 16  | 0.556 | 2.5274 | 0      | ####<br># | 0.044 | 348 | tags=88%,<br>list=36%,<br>signal=134% |
| 104 | GO_ENDOPEPTIDASE_ACTIVITY                       | 22  | 0.483 | 2.5243 | 0      | ####<br># | 0.047 | 273 | tags=68%,<br>list=28%,<br>signal=93%  |
| 105 | GO_LOCOMOTION                                   | 122 | 0.242 | 2.5197 | 0      | ####<br># | 0.051 | 467 | tags=67%,<br>list=48%,<br>signal=113% |
| 106 | GO_REGULATION_OF_DEFENSE_RESPONSE               | 97  | 0.263 | 2.5007 | 0      | ####<br># | 0.056 | 546 | tags=79%,<br>list=56%,<br>signal=163% |
| 107 | GO_REGULATION_OF_INTERFERON_GAMMA_PRODUCTION    | 21  | 0.482 | 2.488  | 0      | ####<br># | 0.06  | 161 | tags=57%,<br>list=17%,<br>signal=67%  |

|     |                                                                                |    |       |        |        |           |       |     |                                       |
|-----|--------------------------------------------------------------------------------|----|-------|--------|--------|-----------|-------|-----|---------------------------------------|
| 108 | GO_REGULATION_OF_CYTOKINE<br>_PRODUCTION                                       | 93 | 0.263 | 2.4836 | 0      | ####<br># | 0.065 | 514 | tags=75%,<br>list=53%,<br>signal=144% |
| 109 | GO_POSITIVE_REGULATION_OF_<br>LEUKOCYTE_PROLIFERATION                          | 29 | 0.424 | 2.4761 | 0      | ####<br># | 0.074 | 515 | tags=93%,<br>list=53%,<br>signal=192% |
| 110 | GO_MYELOID_LEUKOCYTE_MIG<br>RATION                                             | 19 | 0.515 | 2.4703 | 0      | ####<br># | 0.074 | 348 | tags=84%,<br>list=36%,<br>signal=128% |
| 111 | GO_TRANSPORT_VESICLE_MEMB<br>RANE                                              | 16 | 0.541 | 2.4577 | 0      | ####<br># | 0.083 | 242 | tags=75%,<br>list=25%,<br>signal=98%  |
| 112 | GO_HEPARIN_BINDING                                                             | 20 | 0.499 | 2.4347 | 0      | ####<br># | 0.097 | 174 | tags=60%,<br>list=18%,<br>signal=72%  |
| 113 | GO_B_CELL_RECEPTOR_SIGNALI<br>NG_PATHWAY                                       | 19 | 0.495 | 2.4327 | 0      | ####<br># | 0.098 | 338 | tags=79%,<br>list=35%,<br>signal=119% |
| 114 | GO_REGULATION_OF_LYMPHOC<br>YTE_MIGRATION                                      | 15 | 0.554 | 2.429  | 0      | ####<br># | 0.1   | 137 | tags=60%,<br>list=14%,<br>signal=69%  |
| 115 | GO_AMIDE_BINDING                                                               | 33 | 0.392 | 2.4247 | 0      | ####<br># | 0.103 | 187 | tags=52%,<br>list=19%,<br>signal=62%  |
| 116 | GO_RESPONSE_TO_TUMOR_NECR<br>OSIS_FACTOR                                       | 30 | 0.404 | 2.4101 | 0      | 0.001     | 0.116 | 284 | tags=63%,<br>list=29%,<br>signal=87%  |
| 117 | GO_REGULATION_OF_LEUKOCYT<br>E_DIFFERENTIATION                                 | 46 | 0.334 | 2.4101 | 0      | 0.001     | 0.116 | 567 | tags=91%,<br>list=58%,<br>signal=208% |
| 118 | GO_RESPONSE_TO_INTERLEUKIN<br>_1                                               | 19 | 0.491 | 2.393  | 0      | 0.001     | 0.132 | 284 | tags=74%,<br>list=29%,<br>signal=102% |
| 119 | GO_COATED_VESICLE_MEMBRA<br>NE                                                 | 17 | 0.514 | 2.3908 | 0.0019 | 0.001     | 0.134 | 242 | tags=71%,<br>list=25%,<br>signal=92%  |
| 120 | GO_LYTIC_VACUOLE                                                               | 54 | 0.316 | 2.3841 | 0      | 0.001     | 0.143 | 377 | tags=69%,<br>list=39%,<br>signal=106% |
| 121 | GO_POSITIVE_REGULATION_OF_<br>ERK1_AND_ERK2_CASCADE                            | 22 | 0.458 | 2.3709 | 0      | 0.001     | 0.153 | 384 | tags=82%,<br>list=39%,<br>signal=132% |
| 122 | GO_REGULATION_OF_CYTOSOLI<br>C_CALCIUM_ION_CONCENTRATI<br>ON                   | 22 | 0.46  | 2.363  | 0.0039 | 0.002     | 0.165 | 266 | tags=68%,<br>list=27%,<br>signal=92%  |
| 123 | GO_REGULATION_OF_RESPONSE<br>_TO_WOUNDING                                      | 50 | 0.32  | 2.3601 | 0      | 0.002     | 0.168 | 361 | tags=66%,<br>list=37%,<br>signal=99%  |
| 124 | GO_PROTEIN_ACTIVATION_CASC<br>ADE                                              | 15 | 0.534 | 2.3591 | 0      | 0.002     | 0.169 | 327 | tags=80%,<br>list=34%,<br>signal=119% |
| 125 | GO_REGULATION_OF_TUMOR_NE<br>CROSIS_FACTOR_SUPERFAMILY_<br>CYTOKINE_PRODUCTION | 20 | 0.469 | 2.3537 | 0      | 0.002     | 0.175 | 400 | tags=85%,<br>list=41%,<br>signal=141% |
| 126 | GO_REGULATION_OF_IMMUNE_E<br>FFECTOR_PROCESS                                   | 60 | 0.294 | 2.3513 | 0      | 0.002     | 0.178 | 563 | tags=85%,<br>list=58%,<br>signal=189% |
| 127 | GO_CALCIUM_ION_TRANSPORT                                                       | 23 | 0.458 | 2.3501 | 0      | 0.002     | 0.178 | 348 | tags=78%,<br>list=36%,<br>signal=119% |

|     |                                                        |     |       |        |        |       |       |     |                                  |
|-----|--------------------------------------------------------|-----|-------|--------|--------|-------|-------|-----|----------------------------------|
| 128 | GO_CELLULAR_RESPONSE_TO_INTERLEUKIN_1                  | 16  | 0.522 | 2.3496 | 0      | 0.002 | 0.179 | 214 | tags=69%, list=22%, signal=87%   |
| 129 | GO_REGULATION_OF_CYTOKINE_SECRETION                    | 29  | 0.404 | 2.3455 | 0.0018 | 0.002 | 0.184 | 563 | tags=97%, list=58%, signal=222%  |
| 130 | GO_DIVALENT_INORGANIC_CATION_HOMEOSTASIS               | 32  | 0.387 | 2.3276 | 0.0018 | 0.002 | 0.206 | 266 | tags=59%, list=27%, signal=79%   |
| 131 | GO_NEGATIVE_REGULATION_OF_HOMEOSTATIC_PROCESS          | 20  | 0.467 | 2.3147 | 0      | 0.002 | 0.232 | 360 | tags=80%, list=37%, signal=124%  |
| 132 | GO_POSITIVE_REGULATION_OF_DEFENSE_RESPONSE             | 58  | 0.288 | 2.3034 | 0      | 0.002 | 0.248 | 546 | tags=83%, list=56%, signal=177%  |
| 133 | GO_NEGATIVE_REGULATION_OF_CELL_PROLIFERATION           | 59  | 0.282 | 2.2874 | 0.0017 | 0.003 | 0.273 | 407 | tags=68%, list=42%, signal=109%  |
| 134 | GO_POSITIVE_REGULATION_OF_CELL_COMMUNICATION           | 134 | 0.213 | 2.2837 | 0      | 0.003 | 0.275 | 462 | tags=64%, list=47%, signal=105%  |
| 135 | GO_REGULATION_OF_I_KAPPA_B_KINASE_NF_KAPPA_B_SIGNALING | 29  | 0.387 | 2.2735 | 0      | 0.003 | 0.306 | 420 | tags=79%, list=43%, signal=135%  |
| 136 | GO_TRANS_GOLGI_NETWORK                                 | 18  | 0.485 | 2.262  | 0      | 0.003 | 0.32  | 178 | tags=61%, list=18%, signal=73%   |
| 137 | GO_MEMBRANE_MICRODOMAIN                                | 34  | 0.35  | 2.2612 | 0      | 0.003 | 0.32  | 455 | tags=79%, list=47%, signal=144%  |
| 138 | GO_CYTOKINE_RECEPTOR_BINDING                           | 34  | 0.358 | 2.2478 | 0      | 0.003 | 0.347 | 195 | tags=47%, list=20%, signal=57%   |
| 139 | GO_POSITIVE_REGULATION_OF_RESPONSE_TO_WOUNDING         | 24  | 0.414 | 2.2459 | 0.0019 | 0.003 | 0.354 | 387 | tags=79%, list=40%, signal=128%  |
| 140 | GO_REGULATION_OF_CELLULAR_COMPONENT_MOVEMENT           | 88  | 0.251 | 2.2427 | 0      | 0.003 | 0.358 | 300 | tags=49%, list=31%, signal=64%   |
| 141 | GO_POSITIVE_REGULATION_OF_LEUKOCYTE_DIFFERENTIATION    | 31  | 0.369 | 2.2412 | 0      | 0.003 | 0.362 | 362 | tags=71%, list=37%, signal=109%  |
| 142 | GO_NEGATIVE_REGULATION_OF_HOMOTYPIC_CELL_CELL_ADHESION | 15  | 0.508 | 2.2391 | 0      | 0.003 | 0.367 | 486 | tags=100%, list=50%, signal=197% |
| 143 | GO_POSITIVE_REGULATION_OF_MAPK_CASCADE                 | 48  | 0.312 | 2.2339 | 0.0017 | 0.004 | 0.383 | 462 | tags=75%, list=47%, signal=136%  |
| 144 | GO_SULFUR_COMPOUND_BINDING                             | 28  | 0.384 | 2.2266 | 0.0038 | 0.004 | 0.407 | 174 | tags=50%, list=18%, signal=59%   |
| 145 | GO_LYTIC_VACUOLE_MEMBRANE                              | 26  | 0.392 | 2.219  | 0.0056 | 0.004 | 0.432 | 161 | tags=50%, list=17%, signal=58%   |
| 146 | GO_PLATELET_ACTIVATION                                 | 23  | 0.414 | 2.211  | 0.0018 | 0.004 | 0.452 | 451 | tags=87%, list=46%, signal=158%  |
| 147 | GO_SECRETION_BY_CELL                                   | 45  | 0.309 | 2.2093 | 0.0019 | 0.004 | 0.457 | 367 | tags=64%, list=38%, signal=99%   |

|     |                                                           |     |       |        |        |       |       |     |                                  |
|-----|-----------------------------------------------------------|-----|-------|--------|--------|-------|-------|-----|----------------------------------|
| 148 | GO_REGULATION_OF_ION_HOMEOSTASIS                          | 25  | 0.398 | 2.2089 | 0.0019 | 0.004 | 0.457 | 167 | tags=48%, list=17%, signal=56%   |
| 149 | GO_LYMPHOCYTE_DIFFERENTIATION                             | 45  | 0.312 | 2.2073 | 0.0018 | 0.004 | 0.458 | 552 | tags=87%, list=57%, signal=191%  |
| 150 | GO_REGULATION_OF_LYMPHOCYTE_DIFFERENTIATION               | 31  | 0.373 | 2.204  | 0.0018 | 0.004 | 0.465 | 486 | tags=87%, list=50%, signal=168%  |
| 151 | GO_DIVALENT_INORGANIC_CATION_TRANSPORT                    | 25  | 0.399 | 2.1988 | 0      | 0.005 | 0.48  | 348 | tags=72%, list=36%, signal=109%  |
| 152 | GO_REGULATION_OF_INTRACELLULAR_SIGNAL_TRANSDUCTION        | 143 | 0.202 | 2.1969 | 0.0016 | 0.005 | 0.483 | 470 | tags=64%, list=48%, signal=106%  |
| 153 | GO_ENDOSOMAL_PART                                         | 34  | 0.352 | 2.1923 | 0.0018 | 0.005 | 0.491 | 161 | tags=44%, list=17%, signal=51%   |
| 154 | GO_NEGATIVE_REGULATION_OF_CYTOKINE_PRODUCTION             | 34  | 0.348 | 2.1849 | 0.0018 | 0.005 | 0.51  | 489 | tags=82%, list=50%, signal=160%  |
| 155 | GO_REGULATION_OF_ALPHA_BETA_T_CELL_ACTIVATION             | 19  | 0.437 | 2.1775 | 0.002  | 0.005 | 0.529 | 556 | tags=100%, list=57%, signal=228% |
| 156 | GO_ORGANELLE_SUBCOMPARTMENT                               | 22  | 0.42  | 2.1707 | 0.0019 | 0.005 | 0.546 | 179 | tags=55%, list=18%, signal=65%   |
| 157 | GO_PEPTIDASE_ACTIVITY                                     | 38  | 0.326 | 2.1672 | 0      | 0.006 | 0.554 | 273 | tags=53%, list=28%, signal=70%   |
| 158 | GO_POSITIVE_REGULATION_OF_TRANSPORT                       | 86  | 0.233 | 2.1594 | 0.0018 | 0.006 | 0.571 | 243 | tags=42%, list=25%, signal=51%   |
| 159 | GO_REGULATION_OF_INNATE_IMMUNE_RESPONSE                   | 52  | 0.289 | 2.1372 | 0.0018 | 0.007 | 0.623 | 546 | tags=83%, list=56%, signal=178%  |
| 160 | GO_SERINE_HYDROLASE_ACTIVITY                              | 17  | 0.464 | 2.1266 | 0.0037 | 0.007 | 0.655 | 271 | tags=65%, list=28%, signal=88%   |
| 161 | GO_REGULATION_OF_HOMEOSTATIC_PROCESS                      | 59  | 0.273 | 2.1243 | 0.0018 | 0.007 | 0.658 | 167 | tags=36%, list=17%, signal=40%   |
| 162 | GO_POSITIVE_REGULATION_OF_IKAPPA_KINASE_NFKAPPA_SIGNALING | 25  | 0.389 | 2.1202 | 0.0018 | 0.007 | 0.672 | 420 | tags=80%, list=43%, signal=137%  |
| 163 | GO_REGULATION_OF_CALCIIUM_ION_TRANSPORT                   | 24  | 0.403 | 2.1174 | 0.0036 | 0.007 | 0.676 | 289 | tags=63%, list=30%, signal=87%   |
| 164 | GO_FC_RECEPTOR_SIGNALING_PATHWAY                          | 29  | 0.362 | 2.1158 | 0.0036 | 0.007 | 0.676 | 602 | tags=97%, list=62%, signal=245%  |
| 165 | GO_TRANSPORT_VESICLE                                      | 21  | 0.423 | 2.1122 | 0.0018 | 0.008 | 0.684 | 242 | tags=62%, list=25%, signal=81%   |
| 166 | GO GRANULOCYTE MIGRATION                                  | 15  | 0.481 | 2.1115 | 0.0056 | 0.008 | 0.684 | 343 | tags=80%, list=35%, signal=122%  |
| 167 | GO_CELL_RECOGNITION                                       | 23  | 0.394 | 2.1094 | 0.0019 | 0.008 | 0.686 | 210 | tags=52%, list=22%, signal=65%   |

|     |                                                                      |     |       |        |        |       |       |     |                                  |
|-----|----------------------------------------------------------------------|-----|-------|--------|--------|-------|-------|-----|----------------------------------|
| 168 | GO_REGULATION_OF_INFLAMMATORY_RESPONSE                               | 38  | 0.319 | 2.1019 | 0.0018 | 0.008 | 0.7   | 361 | tags=66%, list=37%, signal=100%  |
| 169 | GO_IMMUNE_SYSTEM_DEVELOPMENT                                         | 90  | 0.225 | 2.0942 | 0.0017 | 0.008 | 0.721 | 405 | tags=60%, list=42%, signal=93%   |
| 170 | GO_ENDOSOME                                                          | 59  | 0.273 | 2.09   | 0.0018 | 0.009 | 0.734 | 287 | tags=51%, list=29%, signal=68%   |
| 171 | GO_POSITIVE_REGULATION_OF_LOCOMOTION                                 | 53  | 0.283 | 2.086  | 0.0018 | 0.009 | 0.744 | 172 | tags=38%, list=18%, signal=43%   |
| 172 | GO_REGULATION_OF_HEMOPOIESIS                                         | 54  | 0.275 | 2.084  | 0.0034 | 0.009 | 0.748 | 567 | tags=85%, list=58%, signal=193%  |
| 173 | GO_REGULATION_OF_MAPK_CASCADE                                        | 61  | 0.261 | 2.0832 | 0.0018 | 0.009 | 0.748 | 462 | tags=70%, list=47%, signal=126%  |
| 174 | GO_INTRINSIC_COMPONENT_OF_ENDOPLASMIC_RETICULUM_MEMBRANE             | 23  | 0.396 | 2.0816 | 0.0073 | 0.009 | 0.752 | 75  | tags=39%, list=8%, signal=41%    |
| 175 | GO_MOVEMENT_OF_CELL_OR_SUBCELLULAR_COMPONENT                         | 120 | 0.201 | 2.0731 | 0.0018 | 0.009 | 0.776 | 462 | tags=64%, list=47%, signal=107%  |
| 176 | GO_REGULATION_OF_B_CELL_ACTIVATION                                   | 25  | 0.373 | 2.0695 | 0.0071 | 0.009 | 0.783 | 389 | tags=72%, list=40%, signal=117%  |
| 177 | GO_CELLULAR_DEFENSE_RESPONSE                                         | 15  | 0.466 | 2.0629 | 0.0018 | 0.01  | 0.798 | 526 | tags=100%, list=54%, signal=214% |
| 178 | GO_ALPHA_BETA_T_CELL_ACTIVATION                                      | 16  | 0.451 | 2.0567 | 0.0019 | 0.01  | 0.813 | 541 | tags=100%, list=56%, signal=221% |
| 179 | GO_T_CELL_SELECTION                                                  | 16  | 0.451 | 2.0464 | 0.0019 | 0.011 | 0.831 | 541 | tags=100%, list=57%, signal=229% |
| 180 | GO_MYELOID_LEUKOCYTE_ACTIVATION                                      | 18  | 0.436 | 2.0429 | 0.0053 | 0.011 | 0.84  | 556 | tags=38%, list=6%, signal=40%    |
| 181 | GO_COATED_VESICLE                                                    | 21  | 0.406 | 2.0322 | 0      | 0.012 | 0.857 | 55  | tags=52%, list=20%, signal=64%   |
| 182 | GO_REGULATION_OF_SYMBIOSIS_ENCOMPASSING_MUTUALISM_THROUGH_PARASITISM | 23  | 0.379 | 2.0294 | 0.0059 | 0.012 | 0.863 | 198 | tags=92%, list=57%, signal=209%  |
| 183 | GO_CELL_ACTIVATION_INVOLVED_IN_IMMUNE_RESPONSE                       | 25  | 0.361 | 2.023  | 0.0075 | 0.012 | 0.866 | 556 | tags=81%, list=39%, signal=131%  |
| 184 | GO_NEGATIVE_REGULATION_OF_IMMUNE_RESPONSE                            | 16  | 0.45  | 2.0169 | 0.0039 | 0.013 | 0.875 | 380 | tags=83%, list=59%, signal=194%  |
| 185 | GO_REGULATION_OF_GTPASE_ACTIVITY                                     | 54  | 0.257 | 2.0124 | 0      | 0.013 | 0.881 | 578 | tags=68%, list=30%, signal=96%   |
| 186 | GO_REGULATION_OF_CELL_SHAPE                                          | 19  | 0.407 | 2.0098 | 0.0056 | 0.013 | 0.885 | 291 | tags=54%, list=25%, signal=70%   |
| 187 | GO_INTRINSIC_COMPONENT_OF_ORGANELLE_MEMBRANE                         | 26  | 0.355 | 2.0079 | 0.0129 | 0.013 | 0.887 | 242 |                                  |

|     |                                                      |    |       |        |        |       |       |     |                                        |
|-----|------------------------------------------------------|----|-------|--------|--------|-------|-------|-----|----------------------------------------|
| 188 | GO_EXOCYTOSIS                                        | 25 | 0.373 | 2.0078 | 0.0093 | 0.013 | 0.887 | 367 | tags=72%,<br>list=38%,<br>signal=113%  |
| 189 | GO_REGULATION_OF_CELL_KILLING                        | 16 | 0.446 | 2.0051 | 0.0076 | 0.013 | 0.89  | 546 | tags=100%,<br>list=56%,<br>signal=224% |
| 190 | GO_POSITIVE_REGULATION_OF_LYMPHOCYTE_DIFFERENTIATION | 25 | 0.365 | 2.0017 | 0.0056 | 0.013 | 0.893 | 362 | tags=72%,<br>list=37%,<br>signal=112%  |
| 191 | GO_DEFENSE_RESPONSE_TO_BACTERIUM                     | 24 | 0.371 | 1.9997 | 0.0054 | 0.013 | 0.898 | 125 | tags=38%,<br>list=13%,<br>signal=42%   |
| 192 | GO_REGULATION_OF_ANATOMICAL_STRUCTURE_MORPHOGENESIS  | 83 | 0.221 | 1.992  | 0.0034 | 0.014 | 0.908 | 345 | tags=52%,<br>list=35%,<br>signal=73%   |
| 193 | GO_POSITIVE_REGULATION_OF_ION_TRANSPORT              | 19 | 0.417 | 1.9906 | 0.0056 | 0.014 | 0.909 | 111 | tags=42%,<br>list=11%,<br>signal=47%   |
| 194 | GO_ENDOCYTIC_VESICLE                                 | 35 | 0.309 | 1.9745 | 0.0017 | 0.015 | 0.924 | 161 | tags=40%,<br>list=17%,<br>signal=46%   |
| 195 | GO_REGULATION_OF_LEUKOCYTE_MEDIATED_CYTOTOXICITY     | 15 | 0.445 | 1.974  | 0.0019 | 0.015 | 0.924 | 546 | tags=100%,<br>list=56%,<br>signal=224% |
| 196 | GO_REGULATION_OF_MULTICELLULAR_ORGANISM_PROCESS      | 46 | 0.282 | 1.9664 | 0.007  | 0.016 | 0.932 | 243 | tags=48%,<br>list=25%,<br>signal=61%   |
| 197 | GO_VESICLE_MEMBRANE                                  | 36 | 0.313 | 1.9661 | 0.009  | 0.016 | 0.932 | 242 | tags=50%,<br>list=25%,<br>signal=64%   |
| 198 | GO_POSITIVE_REGULATION_OF_HEMOPOIESIS                | 34 | 0.314 | 1.9594 | 0      | 0.017 | 0.942 | 362 | tags=65%,<br>list=37%,<br>signal=99%   |
| 199 | GO_LATE_ENDOSOME                                     | 20 | 0.395 | 1.9503 | 0.0018 | 0.017 | 0.955 | 287 | tags=65%,<br>list=29%,<br>signal=90%   |
| 200 | GO_VACUOLE                                           | 91 | 0.208 | 1.9458 | 0.0084 | 0.018 | 0.957 | 387 | tags=57%,<br>list=40%,<br>signal=86%   |
| 201 | GO_MHC_PROTEIN_BINDING                               | 15 | 0.435 | 1.9444 | 0.0118 | 0.018 | 0.958 | 556 | tags=100%,<br>list=57%,<br>signal=86%  |
| 202 | GO_MEMBRANE_PROTEIN_COMPLEX                          | 67 | 0.231 | 1.9437 | 0.0051 | 0.018 | 0.958 | 161 | tags=100%,<br>list=33%,<br>signal=37%  |
| 203 | GO_POSITIVE_REGULATION_OF_PROTEIN_SECRETION          | 26 | 0.339 | 1.9361 | 0.0122 | 0.019 | 0.965 | 256 | tags=54%,<br>list=26%,<br>signal=71%   |
| 204 | GO_FC_GAMMA_RECEPTOR_SIGNALING_PATHWAY               | 19 | 0.388 | 1.9229 | 0.004  | 0.02  | 0.974 | 602 | tags=100%,<br>list=62%,<br>signal=257% |
| 205 | GO_PEPTIDYL_TYROSINE_MODIFICATION                    | 24 | 0.363 | 1.9228 | 0.0072 | 0.02  | 0.974 | 470 | tags=83%,<br>list=48%,<br>signal=157%  |
| 206 | GO_CYTOKINE_PRODUCTION                               | 23 | 0.36  | 1.9168 | 0.0039 | 0.021 | 0.978 | 546 | tags=91%,<br>list=56%,<br>signal=203%  |
| 207 | GO_POSITIVE_REGULATION_OF_INFLAMMATORY_RESPONSE      | 18 | 0.396 | 1.904  | 0.0095 | 0.022 | 0.985 | 387 | tags=78%,<br>list=40%,<br>signal=127%  |

|     |                                                            |     |       |        |        |       |       |     |                                        |
|-----|------------------------------------------------------------|-----|-------|--------|--------|-------|-------|-----|----------------------------------------|
| 208 | GO_REGULATION_OF_T_CELL_DIFFERENTIATION                    | 23  | 0.361 | 1.8926 | 0.0161 | 0.024 | 0.989 | 486 | tags=87%,<br>list=50%,<br>signal=169%  |
| 209 | GO_POSITIVE_REGULATION_OF_CYTOKINE_PRODUCTION              | 66  | 0.235 | 1.885  | 0.0083 | 0.025 | 0.991 | 392 | tags=59%,<br>list=40%,<br>signal=92%   |
| 210 | GO_HEMOSTASIS                                              | 36  | 0.286 | 1.8824 | 0.0091 | 0.025 | 0.991 | 616 | tags=92%,<br>list=63%,<br>signal=240%  |
| 211 | GO_CELLULAR_CHEMICAL_HOMEOSTASIS                           | 51  | 0.253 | 1.8796 | 0.0054 | 0.025 | 0.992 | 270 | tags=47%,<br>list=28%,<br>signal=62%   |
| 212 | GO_REGULATION_OF_PHOSPHATIDYLINOSITOL_3_KINASE_SIGNALING   | 20  | 0.384 | 1.8789 | 0.006  | 0.025 | 0.992 | 470 | tags=85%,<br>list=48%,<br>signal=161%  |
| 213 | GO_POSITIVE_REGULATION_OF_INNATE_IMMUNE_RESPONSE           | 40  | 0.278 | 1.8743 | 0.0053 | 0.026 | 0.993 | 713 | tags=100%,<br>list=73%,<br>signal=358% |
| 214 | GO_NEGATIVE_REGULATION_OF_RESPONSE_TO_STIMULUS             | 104 | 0.186 | 1.8736 | 0.0152 | 0.026 | 0.993 | 360 | tags=52%,<br>list=37%,<br>signal=74%   |
| 215 | GO_POSITIVE_REGULATION_OF_ALPHA_BETA_T_CELL_ACTIVATION     | 15  | 0.435 | 1.8726 | 0.0058 | 0.026 | 0.993 | 556 | tags=100%,<br>list=57%,<br>signal=229% |
| 216 | GO_REGULATION_OF_HYDROLASE_ACTIVITY                        | 106 | 0.187 | 1.8643 | 0.0049 | 0.027 | 0.995 | 299 | tags=44%,<br>list=31%,<br>signal=57%   |
| 217 | GO_CELL_DEATH                                              | 86  | 0.202 | 1.8622 | 0.0107 | 0.027 | 0.995 | 267 | tags=44%,<br>list=27%,<br>signal=55%   |
| 218 | GO_REGULATION_OF_PROTEIN_SECRETION                         | 44  | 0.262 | 1.8607 | 0.0085 | 0.028 | 0.996 | 256 | tags=45%,<br>list=26%,<br>signal=59%   |
| 219 | GO_GOLGI_APPARATUS_PART                                    | 51  | 0.247 | 1.8445 | 0.0113 | 0.03  | 0.997 | 179 | tags=37%,<br>list=18%,<br>signal=43%   |
| 220 | GO_POSITIVE_REGULATION_OF_HYDROLASE_ACTIVITY               | 82  | 0.205 | 1.8392 | 0.0051 | 0.031 | 0.998 | 578 | tags=78%,<br>list=59%,<br>signal=176%  |
| 221 | GO_REGULATION_OF_METAL_ION_TRANSPORT                       | 31  | 0.297 | 1.8381 | 0.0145 | 0.031 | 0.998 | 289 | tags=52%,<br>list=30%,<br>signal=71%   |
| 222 | GO_CELLULAR_RESPONSE_TO_BIOTIC_STIMULUS                    | 30  | 0.305 | 1.8362 | 0.0224 | 0.031 | 0.998 | 521 | tags=83%,<br>list=53%,<br>signal=174%  |
| 223 | GO_POSITIVE_REGULATION_OF_CELL_PROLIFERATION               | 95  | 0.194 | 1.8349 | 0.0067 | 0.031 | 0.998 | 470 | tags=64%,<br>list=48%,<br>signal=112%  |
| 224 | GO_POSITIVE_REGULATION_OF_IMMUNE_EFFECTOR_PROCESS          | 33  | 0.291 | 1.8251 | 0.0177 | 0.033 | 1     | 556 | tags=85%,<br>list=57%,<br>signal=191%  |
| 225 | GO_NEGATIVE_REGULATION_OF_MULTICELLULAR_ORGANISMAL_PROCESS | 98  | 0.188 | 1.8153 | 0.0139 | 0.035 | 1     | 567 | tags=76%,<br>list=58%,<br>signal=163%  |
| 226 | GO_LEUKOCYTE_PROLIFERATION                                 | 16  | 0.404 | 1.8105 | 0.0092 | 0.035 | 1     | 362 | tags=75%,<br>list=37%,<br>signal=117%  |
| 227 | GO_GOLGI_MEMBRANE                                          | 41  | 0.269 | 1.8091 | 0.0182 | 0.036 | 1     | 93  | tags=29%,<br>list=10%,<br>signal=31%   |



|     |                                              |    |       |        |        |       |   |     |                                        |
|-----|----------------------------------------------|----|-------|--------|--------|-------|---|-----|----------------------------------------|
| 228 | GO_LEUKOCYTE_DIFFERENTIATION                 | 63 | 0.219 | 1.8006 | 0.0052 | 0.037 | 1 | 564 | tags=79%,<br>list=58%,<br>signal=176%  |
| 229 | GO_POSITIVE_REGULATION_OF_CYTOKINE_SECRETION | 16 | 0.395 | 1.7934 | 0.0236 | 0.039 | 1 | 595 | tags=100%,<br>list=61%,<br>signal=253% |
| 230 | GO_REGULATION_OF_LEUKOCYTE_MEDIATED_IMMUNITY | 32 | 0.291 | 1.7911 | 0.026  | 0.039 | 1 | 551 | tags=84%,<br>list=57%,<br>signal=188%  |
| 231 | GO_CYTOKINE_RECEPTOR_ACTIVITY                | 16 | 0.397 | 1.7873 | 0.0331 | 0.04  | 1 | 534 | tags=94%,<br>list=55%,<br>signal=204%  |
| 232 | GO_VACUOLAR_MEMBRANE                         | 47 | 0.252 | 1.7849 | 0.0189 | 0.04  | 1 | 246 | tags=45%,<br>list=25%,<br>signal=57%   |
| 233 | GO_G_PROTEIN_COUPLED_RECEPTOR_ACTIVITY       | 27 | 0.318 | 1.7837 | 0.0212 | 0.04  | 1 | 514 | tags=85%,<br>list=53%,<br>signal=175%  |
| 234 | GO_VACUOLAR_PART                             | 55 | 0.234 | 1.7782 | 0.0214 | 0.041 | 1 | 96  | tags=27%,<br>list=10%,<br>signal=29%   |
| 235 | GO_CYTOPLASMIC_SIDE_OF_MEMBRANE              | 17 | 0.37  | 1.765  | 0.0091 | 0.044 | 1 | 619 | tags=100%,<br>list=64%,<br>signal=270% |
| 236 | GO_CYTOPLASMIC_VESICLE_PART                  | 46 | 0.246 | 1.765  | 0.0173 | 0.044 | 1 | 161 | tags=35%,<br>list=17%,<br>signal=40%   |
| 237 | GO_CALCIIUM_ION_TRANSMEMBRANE_TRANSPORT      | 16 | 0.382 | 1.7568 | 0.0172 | 0.046 | 1 | 167 | tags=50%,<br>list=17%,<br>signal=59%   |
| 238 | GO_REGULATION_OF_SECRETION                   | 64 | 0.215 | 1.7452 | 0.0189 | 0.049 | 1 | 358 | tags=53%,<br>list=37%,<br>signal=78%   |
| 239 | GO_CYTOKINE_BINDING                          | 17 | 0.372 | 1.7403 | 0.0264 | 0.05  | 1 | 272 | tags=59%,<br>list=28%,<br>signal=80%   |

| <b>Negative DEGs enrichment results in the C5</b> |                            |             |           |            |                  |                  |                   |                    |                                       |
|---------------------------------------------------|----------------------------|-------------|-----------|------------|------------------|------------------|-------------------|--------------------|---------------------------------------|
| <b>follow link to MSigDB</b>                      |                            | <b>SIZE</b> | <b>ES</b> | <b>NES</b> | <b>NOM p-val</b> | <b>FDR q-val</b> | <b>FWER p-val</b> | <b>RANK AT MAX</b> | <b>LEADING EDGE</b>                   |
| 1                                                 | GO_CELL_CYCLE_PROCESS      | 109         | 0.487     | -5.233     | 0                | 0                | 0                 | 412                | tags=85%,<br>list=42%,<br>signal=131% |
| 2                                                 | GO_CELL_CYCLE              | 124         | 0.455     | -5.117     | 0                | 0                | 0                 | 412                | tags=81%,<br>list=42%,<br>signal=123% |
| 3                                                 | GO_MITOTIC_CELL_CYCLE      | 87          | 0.522     | -5.098     | 0                | 0                | 0                 | 412                | tags=90%,<br>list=42%,<br>signal=142% |
| 4                                                 | GO_CHROMOSOME_ORGANIZATION | 88          | 0.489     | -4.722     | 0                | 0                | 0                 | 396                | tags=84%,<br>list=41%,<br>signal=129% |
| 5                                                 | GO_CHROMOSOME              | 88          | 0.463     | -4.585     | 0                | 0                | 0                 | 436                | tags=86%,<br>list=45%,<br>signal=142% |
| 6                                                 | GO_DNA_METABOLIC_PROCESS   | 70          | 0.492     | -4.37      | 0                | 0                | 0                 | 415                | tags=89%,<br>list=43%,<br>signal=143% |

|    |                                             |     |       |        |   |   |   |     |                                        |
|----|---------------------------------------------|-----|-------|--------|---|---|---|-----|----------------------------------------|
| 7  | GO_ORGANELLE_FISSION                        | 50  | 0.558 | -4.362 | 0 | 0 | 0 | 404 | tags=94%,<br>list=41%,<br>signal=152%  |
| 8  | GO_CELL_DIVISION                            | 53  | 0.541 | -4.242 | 0 | 0 | 0 | 404 | tags=92%,<br>list=41%,<br>signal=149%  |
| 9  | GO_CHROMOSOMAL_REGION                       | 40  | 0.578 | -4.201 | 0 | 0 | 0 | 412 | tags=98%,<br>list=42%,<br>signal=162%  |
| 10 | GO_MITOTIC_NUCLEAR_DIVISION                 | 44  | 0.567 | -4.159 | 0 | 0 | 0 | 404 | tags=95%,<br>list=41%,<br>signal=156%  |
| 11 | GO_DNA_REPAIR                               | 38  | 0.569 | -3.922 | 0 | 0 | 0 | 391 | tags=95%,<br>list=40%,<br>signal=152%  |
| 12 | GO_CHROMOSOME_SEGREGATION                   | 33  | 0.577 | -3.778 | 0 | 0 | 0 | 302 | tags=85%,<br>list=31%,<br>signal=119%  |
| 13 | GO_SISTER_CHROMATID_SEGREGATION             | 30  | 0.591 | -3.67  | 0 | 0 | 0 | 302 | tags=87%,<br>list=31%,<br>signal=122%  |
| 14 | GO_NUCLEAR_CHROMOSOME_SEGREGATION           | 32  | 0.571 | -3.646 | 0 | 0 | 0 | 302 | tags=84%,<br>list=31%,<br>signal=118%  |
| 15 | GO_DNA_CONFORMATION_CHANGE                  | 26  | 0.632 | -3.609 | 0 | 0 | 0 | 302 | tags=92%,<br>list=31%,<br>signal=130%  |
| 16 | GO_CELLULAR_RESPONSE_TO_DNA_DAMAGE_STIMULUS | 59  | 0.415 | -3.486 | 0 | 0 | 0 | 412 | tags=81%,<br>list=42%,<br>signal=132%  |
| 17 | GO_POLY_A_RNA_BINDING                       | 64  | 0.402 | -3.459 | 0 | 0 | 0 | 422 | tags=81%,<br>list=43%,<br>signal=134%  |
| 18 | GO_MICROTUBULE_CYTOSKELETON                 | 61  | 0.399 | -3.429 | 0 | 0 | 0 | 400 | tags=77%,<br>list=41%,<br>signal=123%  |
| 19 | GO_CATALYTIC_COMPLEX                        | 50  | 0.448 | -3.428 | 0 | 0 | 0 | 373 | tags=80%,<br>list=38%,<br>signal=123%  |
| 20 | GO_CHROMOSOME_CENTROMERIC_REGION            | 20  | 0.661 | -3.414 | 0 | 0 | 0 | 302 | tags=95%,<br>list=31%,<br>signal=135%  |
| 21 | GO_SPINDLE                                  | 31  | 0.539 | -3.409 | 0 | 0 | 0 | 272 | tags=77%,<br>list=28%,<br>signal=104%  |
| 22 | GO_CELLULAR_RESPONSE_TO_STRESS              | 128 | 0.294 | -3.36  | 0 | 0 | 0 | 391 | tags=66%,<br>list=40%,<br>signal=95%   |
| 23 | GO_CONDENSED_CHROMOSOME                     | 24  | 0.596 | -3.335 | 0 | 0 | 0 | 409 | tags=100%,<br>list=42%,<br>signal=168% |
| 24 | GO_RNA_BINDING                              | 92  | 0.324 | -3.333 | 0 | 0 | 0 | 403 | tags=71%,<br>list=41%,<br>signal=109%  |
| 25 | GO_CELL_CYCLE_PHASE_TRANSITION              | 34  | 0.493 | -3.313 | 0 | 0 | 0 | 224 | tags=68%,<br>list=23%,<br>signal=85%   |
| 26 | GO_TRANSFERASE_COMPLEX                      | 38  | -0.49 | -3.294 | 0 | 0 | 0 | 391 | tags=87%,<br>list=40%,<br>signal=139%  |

|    |                                                                 |    |       |        |   |       |   |       |                                 |                                 |
|----|-----------------------------------------------------------------|----|-------|--------|---|-------|---|-------|---------------------------------|---------------------------------|
| 27 | GO_MICROTUBULE_CYTOSKELETON_ORGANIZATION                        | 25 | 0.568 | -3.294 | 0 | 0     | 0 | 328   | tags=88%, list=34%, signal=129% |                                 |
| 28 | GO_DNA_REPLICATION                                              | 26 | 0.566 | -3.284 | 0 | 0     | 0 | 407   | tags=96%, list=42%, signal=161% |                                 |
| 29 | GO_DNA_DEPENDENT_DNA_REPLICATION                                | 18 | 0.656 | -3.269 | 0 | 0     | 0 | 164   | tags=78%, list=17%, signal=92%  |                                 |
| 30 | GO_MICROTUBULE_BASED_PROCESS                                    | 30 | 0.522 | -3.241 | 0 | 0     | 0 | 328   | tags=83%, list=34%, signal=122% |                                 |
| 31 | GO_REGULATION_OF_MICROTUBULE_BASED_PROCESS                      | 22 | 0.595 | -3.233 | 0 | 0     | 0 | 328   | tags=91%, list=34%, signal=134% |                                 |
| 32 | GO_REGULATION_OF_MICROTUBULE_POLYMERIZATION_OR_DEPOLYMERIZATION | 20 | 0.628 | -3.155 | 0 | 0     | 0 | 328   | tags=95%, list=34%, signal=140% |                                 |
| 33 | GO_NUCLEAR_CHROMOSOME                                           | 49 | 0.414 | -3.153 | 0 | 0     | 0 | 436   | tags=84%, list=45%, signal=144% |                                 |
| 34 | GO_NEGATIVE_REGULATION_OF_PROTEIN_COMPLEX_DISASSEMBLY           | 20 | -0.58 | -3.019 | 0 | 0     | 0 | 328   | tags=90%, list=34%, signal=133% |                                 |
| 35 | GO_REGULATION_OF_PROTEIN_COMPLEX_DISASSEMBLY                    | 24 | 0.518 | -2.927 | 0 | 0     | 0 | 328   | tags=83%, list=34%, signal=123% |                                 |
| 36 | GO_CELL_CYCLE_CHECKPOINT                                        | 24 | 0.512 | -2.921 | 0 | 0     | 0 | 412   | tags=92%, list=42%, signal=155% |                                 |
| 37 | GO_SINGLE_ORGANISM_BIOSYNTHETIC_PROCESS                         | 94 | -0.29 | -2.921 | 0 | 0     | 0 | 226   | tags=46%, list=23%, signal=54%  |                                 |
| 38 | GO_REGULATION_OF_CELL_DIVISION                                  | 27 | 0.493 | -2.912 | 0 | 0     | 0 | 308   | tags=78%, list=32%, signal=111% |                                 |
| 39 | GO_MITOTIC_SISTER_CHROMATID_SEGREGATION                         | 16 | 0.623 | -2.909 | 0 | 0     | 0 | 272   | tags=88%, list=28%, signal=119% |                                 |
| 40 | GO_DNA_PACKAGING                                                | 15 | 0.645 | -2.883 | 0 | ##### | # | 0.001 | 302                             | tags=93%, list=31%, signal=133% |
| 41 | GO_CHROMOSOME_TELOMERIC_REGION                                  | 21 | 0.544 | -2.872 | 0 | ##### | # | 0.001 | 412                             | tags=95%, list=42%, signal=161% |
| 42 | GO_REGULATION_OF_CELL_CYCLE                                     | 89 | 0.288 | -2.824 | 0 | ##### | # | 0.002 | 276                             | tags=52%, list=28%, signal=66%  |
| 43 | GO_CELL_CYCLE_G1_S_PHASE_TRANSITION                             | 20 | 0.546 | -2.811 | 0 | ##### | # | 0.002 | 200                             | tags=70%, list=21%, signal=86%  |
| 44 | GO_REGULATION_OF_NUCLEAR_DIVISION                               | 17 | -0.57 | -2.792 | 0 | ##### | # | 0.002 | 271                             | tags=82%, list=28%, signal=112% |
| 45 | GO_STEROL_METABOLIC_PROCESS                                     | 15 | 0.616 | -2.728 | 0 | ##### | # | 0.002 | 216                             | tags=80%, list=22%, signal=101% |
| 46 | GO_DNA_RECOMBINATION                                            | 24 | 0.482 | -2.726 | 0 | ##### | # | 0.003 | 407                             | tags=88%, list=42%, signal=147% |

|    |                                                     |     |   |       |        |        |           |       |     |                                       |
|----|-----------------------------------------------------|-----|---|-------|--------|--------|-----------|-------|-----|---------------------------------------|
| 47 | GO_PROTEIN_FOLDING                                  | 16  | - | 0.577 | -2.703 | 0      | ####<br># | 0.005 | 343 | tags=94%,<br>list=35%,<br>signal=142% |
| 48 | GO_SMALL_MOLECULE_METABOLIC_PROCESS                 | 119 | - | -0.25 | -2.693 | 0      | ####<br># | 0.005 | 226 | tags=42%,<br>list=23%,<br>signal=48%  |
| 49 | GO_LIPID_BIOSYNTHETIC_PROCESSES                     | 44  | - | 0.359 | -2.693 | 0      | ####<br># | 0.005 | 216 | tags=52%,<br>list=22%,<br>signal=64%  |
| 50 | GO_NEGATIVE_REGULATION_OF_ORGANELLE_ORGANIZATION    | 37  | - | 0.398 | -2.692 | 0      | ####<br># | 0.005 | 328 | tags=70%,<br>list=34%,<br>signal=102% |
| 51 | GO_PROTEIN_DNA_COMPLEX_SUBUNIT_ORGANIZATION         | 17  | - | 0.561 | -2.657 | 0      | ####<br># | 0.009 | 381 | tags=94%,<br>list=39%,<br>signal=152% |
| 52 | GO_REGULATION_OF_MITOTIC_CELL_CYCLE                 | 48  | - | 0.347 | -2.635 | 0      | ####<br># | 0.016 | 412 | tags=75%,<br>list=42%,<br>signal=124% |
| 53 | GO_NEGATIVE_REGULATION_OF_MITOTIC_CELL_CYCLE        | 21  | - | 0.498 | -2.598 | 0      | ####<br># | 0.019 | 412 | tags=90%,<br>list=42%,<br>signal=153% |
| 54 | GO_MITOTIC_CELL_CYCLE_CHECKPOINT                    | 18  | - | 0.531 | -2.591 | 0      | ####<br># | 0.022 | 412 | tags=94%,<br>list=42%,<br>signal=161% |
| 55 | GO_CHROMATIN_ORGANIZATION                           | 37  | - | 0.387 | -2.584 | 0      | ####<br># | 0.023 | 434 | tags=81%,<br>list=45%,<br>signal=141% |
| 56 | GO_SISTER_CHROMATID_COHESION                        | 16  | - | 0.545 | -2.54  | 0      | ####<br># | 0.037 | 396 | tags=94%,<br>list=41%,<br>signal=155% |
| 57 | GO_OXIDATION_REDUCTION_PROCESS                      | 45  | - | 0.349 | -2.536 | 0      | ####<br># | 0.037 | 247 | tags=56%,<br>list=25%,<br>signal=71%  |
| 58 | GO_CHROMATIN_MODIFICATION                           | 35  | - | 0.375 | -2.526 | 0      | ####<br># | 0.039 | 434 | tags=80%,<br>list=45%,<br>signal=139% |
| 59 | GO_PEPTIDYL_LYSINE_MODIFICATION                     | 25  | - | 0.435 | -2.519 | 0      | ####<br># | 0.041 | 412 | tags=84%,<br>list=42%,<br>signal=142% |
| 60 | GO_REGULATION_OF_CHROMOSOME_ORGANIZATION            | 26  | - | -0.44 | -2.518 | 0      | ####<br># | 0.041 | 454 | tags=88%,<br>list=47%,<br>signal=161% |
| 61 | GO_NUCLEAR_CHROMOSOME_TELOMERIC_REGION              | 17  | - | 0.531 | -2.514 | 0      | ####<br># | 0.043 | 412 | tags=94%,<br>list=42%,<br>signal=160% |
| 62 | GO_NEGATIVE_REGULATION_OF_CYTOSKELETON_ORGANIZATION | 23  | - | 0.459 | -2.504 | 0      | ####<br># | 0.046 | 328 | tags=78%,<br>list=34%,<br>signal=115% |
| 63 | GO_ENVELOPE                                         | 61  | - | 0.289 | -2.491 | 0      | ####<br># | 0.052 | 386 | tags=66%,<br>list=40%,<br>signal=102% |
| 64 | GO_MIDBODY                                          | 21  | - | -0.47 | -2.489 | 0.0021 | ####<br># | 0.053 | 272 | tags=71%,<br>list=28%,<br>signal=97%  |
| 65 | GO_ADENYL_NUCLEOTIDE_BINDING                        | 120 | - | 0.226 | -2.485 | 0      | ####<br># | 0.055 | 405 | tags=60%,<br>list=42%,<br>signal=90%  |
| 66 | GO_MICROTUBULE                                      | 26  | - | 0.432 | -2.484 | 0      | ####<br># | 0.055 | 328 | tags=73%,<br>list=34%,<br>signal=107% |

|    |                                                                                                        |     |       |        |   |            |       |     |                                       |
|----|--------------------------------------------------------------------------------------------------------|-----|-------|--------|---|------------|-------|-----|---------------------------------------|
| 67 | GO_SPINDLE_POLE                                                                                        | 16  | 0.539 | -2.48  | 0 | #####<br># | 0.056 | 301 | tags=81%,<br>list=31%,<br>signal=116% |
| 68 | GO_STEROID_METABOLIC_PROCESS                                                                           | 21  | 0.457 | -2.464 | 0 | #####<br># | 0.065 | 231 | tags=67%,<br>list=24%,<br>signal=86%  |
| 69 | GO_LIPID_METABOLIC_PROCESS                                                                             | 79  | 0.264 | -2.463 | 0 | #####<br># | 0.065 | 231 | tags=44%,<br>list=24%,<br>signal=53%  |
| 70 | GO_RESPONSE_TO_ENDOPLASMIC_RETICULUM_STRESS                                                            | 16  | 0.522 | -2.459 | 0 | #####<br># | 0.072 | 356 | tags=88%,<br>list=37%,<br>signal=136% |
| 71 | GO_OXIDOREDUCTASE_ACTIVITY_ACTING_ON_PAIRED_DONORS_WITH_INCORPORATION_OR_REDUCTION_OF_MOLECULAR_OXYGEN | 15  | 0.549 | -2.452 | 0 | 0.001      | 0.077 | 157 | tags=67%,<br>list=16%,<br>signal=78%  |
| 72 | GO_MEIOTIC_CELL_CYCLE                                                                                  | 15  | -0.55 | -2.443 | 0 | 0.001      | 0.086 | 391 | tags=93%,<br>list=40%,<br>signal=154% |
| 73 | GO_RESPONSE_TO_TOPOLOGICALLY_INCORRECT_PROTEIN                                                         | 15  | 0.534 | -2.436 | 0 | 0.001      | 0.091 | 331 | tags=87%,<br>list=34%,<br>signal=129% |
| 74 | GO_TELOMERE_ORGANIZATION                                                                               | 15  | 0.527 | -2.392 | 0 | 0.002      | 0.126 | 407 | tags=93%,<br>list=42%,<br>signal=158% |
| 75 | GO_NEGATIVE_REGULATION_OF_CELL_CYCLE                                                                   | 46  | 0.327 | -2.364 | 0 | 0.002      | 0.16  | 412 | tags=72%,<br>list=42%,<br>signal=118% |
| 76 | GO_REGULATION_OF_CELL_CYCLE_PROCESS                                                                    | 47  | 0.305 | -2.35  | 0 | 0.002      | 0.183 | 276 | tags=55%,<br>list=28%,<br>signal=73%  |
| 77 | GO_CHROMATIN_REMODELING                                                                                | 15  | 0.516 | -2.347 | 0 | 0.002      | 0.19  | 302 | tags=80%,<br>list=31%,<br>signal=114% |
| 78 | GO_SMALL_MOLECULE_BIOSYNTHETIC_PROCESS                                                                 | 37  | 0.337 | -2.312 | 0 | 0.003      | 0.233 | 216 | tags=51%,<br>list=22%,<br>signal=63%  |
| 79 | GO_CELLULAR_AMIDE_METABOLIC_PROCESS                                                                    | 37  | 0.343 | -2.307 | 0 | 0.003      | 0.233 | 379 | tags=70%,<br>list=39%,<br>signal=111% |
| 80 | GO_RIBONUCLEOTIDE_BINDING                                                                              | 134 | 0.204 | -2.307 | 0 | 0.003      | 0.235 | 405 | tags=58%,<br>list=42%,<br>signal=86%  |
| 81 | GO_CYTOSKELETAL_PART                                                                                   | 73  | 0.247 | -2.294 | 0 | 0.003      | 0.253 | 272 | tags=48%,<br>list=28%,<br>signal=62%  |
| 82 | GO_HYDROLASE_ACTIVITY_ACTING_ON_ACID_ANHYDRIDES                                                        | 51  | 0.294 | -2.284 | 0 | 0.003      | 0.264 | 227 | tags=49%,<br>list=23%,<br>signal=61%  |
| 83 | GO_OXIDOREDUCTASE_ACTIVITY                                                                             | 39  | 0.326 | -2.278 | 0 | 0.003      | 0.281 | 157 | tags=44%,<br>list=16%,<br>signal=50%  |
| 84 | GO_MICROTUBULE_ORGANIZING_CENTER                                                                       | 29  | 0.373 | -2.274 | 0 | 0.004      | 0.29  | 400 | tags=76%,<br>list=41%,<br>signal=125% |
| 85 | GO_PROTEIN_MODIFICATION_BY_SMALL_PROTEIN_CONJUGATION_OR_REMOVAL                                        | 43  | 0.307 | -2.271 | 0 | 0.004      | 0.295 | 422 | tags=74%,<br>list=43%,<br>signal=126% |
| 86 | GO_RIBONUCLEOPROTEIN_COMPLEX                                                                           | 26  | 0.382 | -2.254 | 0 | 0.004      | 0.325 | 415 | tags=81%,<br>list=43%,<br>signal=137% |

|     |                                                   |     |   |       |        |        |       |       |     |                                       |
|-----|---------------------------------------------------|-----|---|-------|--------|--------|-------|-------|-----|---------------------------------------|
| 87  | GO_ALCOHOL_METABOLIC_PROCESS                      | 32  | - | 0.353 | -2.25  | 0      | 0.004 | 0.332 | 216 | tags=53%,<br>list=22%,<br>signal=66%  |
| 88  | GO_REGULATION_OF_DNA_METABOLIC_PROCESS            | 41  | - | 0.322 | -2.221 | 0      | 0.005 | 0.402 | 449 | tags=78%,<br>list=46%,<br>signal=139% |
| 89  | GO_ORGANONITROGEN_COMPOUND_METABOLIC_PROCESS      | 92  | - | 0.218 | -2.191 | 0      | 0.006 | 0.455 | 297 | tags=48%,<br>list=30%,<br>signal=62%  |
| 90  | GO_POSITIVE_REGULATION_OF_DNA_METABOLIC_PROCESS   | 21  | - | 0.404 | -2.154 | 0.0066 | 0.008 | 0.538 | 449 | tags=86%,<br>list=46%,<br>signal=156% |
| 91  | GO_ORGANIC_HYDROXY_COMPOUND_BIOSYNTHETIC_PROCESS  | 15  | - | 0.482 | -2.15  | 0.0021 | 0.008 | 0.551 | 216 | tags=67%,<br>list=22%,<br>signal=84%  |
| 92  | GO_COENZYME_METABOLIC_PROCESS                     | 19  | - | 0.446 | -2.142 | 0.0023 | 0.008 | 0.569 | 321 | tags=74%,<br>list=33%,<br>signal=108% |
| 93  | GO_ORGANIC_HYDROXY_COMPOUND_METABOLIC_PROCESS     | 36  | - | 0.317 | -2.139 | 0      | 0.008 | 0.577 | 216 | tags=50%,<br>list=22%,<br>signal=62%  |
| 94  | GO_NUCLEAR_ENVELOPE                               | 40  | - | 0.306 | -2.13  | 0.0046 | 0.009 | 0.596 | 347 | tags=63%,<br>list=36%,<br>signal=93%  |
| 95  | GO_CYTOSKELETON                                   | 110 | - | 0.197 | -2.124 | 0      | 0.009 | 0.611 | 272 | tags=43%,<br>list=28%,<br>signal=53%  |
| 96  | GO_PROTEASOMAL_PROTEIN_CATABOLIC_PROCESS          | 18  | - | 0.434 | -2.12  | 0.0021 | 0.009 | 0.618 | 292 | tags=72%,<br>list=30%,<br>signal=101% |
| 97  | GO_MRNA_PROCESSING                                | 15  | - | 0.472 | -2.114 | 0.0021 | 0.009 | 0.635 | 458 | tags=93%,<br>list=47%,<br>signal=173% |
| 98  | GO_CELLULAR_MODIFIED_AMINO_ACID_METABOLIC_PROCESS | 17  | - | 0.425 | -2.108 | 0.0066 | 0.01  | 0.645 | 188 | tags=53%,<br>list=19%,<br>signal=64%  |
| 99  | GO_CENTROSOME                                     | 24  | - | 0.372 | -2.105 | 0.0043 | 0.01  | 0.651 | 391 | tags=75%,<br>list=40%,<br>signal=122% |
| 100 | GO_PROTEIN_DNA_COMPLEX                            | 15  | - | 0.468 | -2.102 | 0      | 0.01  | 0.658 | 407 | tags=87%,<br>list=42%,<br>signal=147% |
| 101 | GO_HELICASE_ACTIVITY                              | 15  | - | 0.471 | -2.101 | 0.0022 | 0.01  | 0.659 | 156 | tags=60%,<br>list=16%,<br>signal=70%  |
| 102 | GO_ATPASE_ACTIVITY                                | 29  | - | 0.343 | -2.093 | 0.0068 | 0.01  | 0.674 | 359 | tags=69%,<br>list=37%,<br>signal=106% |
| 103 | GO_MRNA_METABOLIC_PROCESS                         | 18  | - | -0.43 | -2.088 | 0.0021 | 0.01  | 0.688 | 403 | tags=83%,<br>list=41%,<br>signal=140% |
| 104 | GO_CHROMATIN_BINDING                              | 29  | - | 0.339 | -2.085 | 0.0155 | 0.01  | 0.694 | 434 | tags=76%,<br>list=45%,<br>signal=133% |
| 105 | GO_NEGATIVE_REGULATION_OF_CELL_CYCLE_PROCESS      | 21  | - | 0.398 | -2.07  | 0.0044 | 0.011 | 0.737 | 412 | tags=81%,<br>list=42%,<br>signal=137% |
| 106 | GO_CHROMATIN                                      | 33  | - | 0.321 | -2.068 | 0      | 0.011 | 0.74  | 436 | tags=76%,<br>list=45%,<br>signal=133% |

|     |                                                                  |     |   |       |        |        |       |       |     |                                       |
|-----|------------------------------------------------------------------|-----|---|-------|--------|--------|-------|-------|-----|---------------------------------------|
| 107 | GO_NUCLEOPLASM_PART                                              | 37  | - | 0.293 | -2.066 | 0      | 0.011 | 0.743 | 412 | tags=73%,<br>list=42%,<br>signal=122% |
| 108 | GO_POSITIVE_REGULATION_OF_CHROMOSOME_ORGANIZATION                | 16  | - | 0.447 | -2.056 | 0.0042 | 0.012 | 0.769 | 434 | tags=88%,<br>list=45%,<br>signal=155% |
| 109 | GO_DNA_INTEGRITY_CHECKPOINT                                      | 15  | - | 0.457 | -2.056 | 0.008  | 0.012 | 0.771 | 412 | tags=87%,<br>list=42%,<br>signal=148% |
| 110 | GO_REGULATION_OF_DNA_REPLICATION                                 | 18  | - | 0.424 | -2.054 | 0.0022 | 0.012 | 0.778 | 412 | tags=83%,<br>list=42%,<br>signal=142% |
| 111 | GO_TRANSFERASE_COMPLEX_TRANSFERRING_PHOSPHORUS_CONTAINING_GROUPS | 17  | - | 0.432 | -2.049 | 0.0044 | 0.012 | 0.79  | 391 | tags=82%,<br>list=40%,<br>signal=135% |
| 112 | GO_REGULATION_OF_ORGANELLE_ORGANIZATION                          | 95  | - | 0.201 | -2.03  | 0.0023 | 0.014 | 0.831 | 331 | tags=51%,<br>list=34%,<br>signal=69%  |
| 113 | GO_REGULATION_OF_SIGNAL_TRANSDUCTION_BY_P53_CLASS_MEDIATOR       | 15  | - | 0.438 | -2.02  | 0.0089 | 0.015 | 0.85  | 412 | tags=87%,<br>list=42%,<br>signal=148% |
| 114 | GO_POSITIVE_REGULATION_OF_CELL_CYCLE                             | 30  | - | 0.326 | -1.985 | 0.0022 | 0.018 | 0.908 | 412 | tags=73%,<br>list=42%,<br>signal=123% |
| 115 | GO_CYTOSKELETON_ORGANIZATION                                     | 61  | - | 0.241 | -1.974 | 0.0024 | 0.019 | 0.915 | 279 | tags=49%,<br>list=29%,<br>signal=65%  |
| 116 | GO_COFACTOR_METABOLIC_PROCESS                                    | 22  | - | 0.356 | -1.95  | 0.0067 | 0.022 | 0.934 | 99  | tags=36%,<br>list=10%,<br>signal=40%  |
| 117 | GO_NUCLEOLUS                                                     | 48  | - | 0.251 | -1.949 | 0.0113 | 0.022 | 0.935 | 412 | tags=67%,<br>list=42%,<br>signal=110% |
| 118 | GO_REPRODUCTION                                                  | 75  | - | -0.21 | -1.918 | 0.0072 | 0.026 | 0.961 | 244 | tags=41%,<br>list=25%,<br>signal=51%  |
| 119 | GO_CARBOHYDRATE_METABOLIC_PROCESS                                | 38  | - | 0.277 | -1.906 | 0.0073 | 0.028 | 0.968 | 406 | tags=68%,<br>list=42%,<br>signal=113% |
| 120 | GO_SULFUR_COMPOUND_METABOLIC_PROCESS                             | 28  | - | 0.317 | -1.894 | 0.0089 | 0.029 | 0.974 | 99  | tags=32%,<br>list=10%,<br>signal=35%  |
| 121 | GO_PROTEIN_COMPLEX_SUBUNIT_ORGANIZATION                          | 122 | - | 0.169 | -1.887 | 0.0049 | 0.03  | 0.979 | 331 | tags=48%,<br>list=34%,<br>signal=64%  |
| 122 | GO_POSITIVE_REGULATION_OF_CELL_CYCLE_PROCESS                     | 24  | - | 0.338 | -1.886 | 0.0133 | 0.03  | 0.979 | 412 | tags=75%,<br>list=42%,<br>signal=127% |
| 123 | GO_MITOCHONDRION                                                 | 71  | - | -0.21 | -1.882 | 0.0069 | 0.03  | 0.98  | 386 | tags=59%,<br>list=40%,<br>signal=91%  |
| 124 | GO_ORGANIC_ACID_METABOLIC_PROCESS                                | 66  | - | 0.216 | -1.87  | 0.0068 | 0.032 | 0.982 | 162 | tags=32%,<br>list=17%,<br>signal=36%  |
| 125 | GO_NEGATIVE_REGULATION_OF_CELLULAR_COMPONENT_ORGANIZATION        | 58  | - | 0.227 | -1.868 | 0.0066 | 0.032 | 0.983 | 328 | tags=53%,<br>list=34%,<br>signal=76%  |
| 126 | GO_ENDOPLASMIC_RETICULUM_LUMEN                                   | 15  | - | 0.407 | -1.863 | 0.0043 | 0.033 | 0.985 | 267 | tags=67%,<br>list=27%,<br>signal=90%  |

|     |                                                                                |     |   |       |        |        |       |       |     |                                       |
|-----|--------------------------------------------------------------------------------|-----|---|-------|--------|--------|-------|-------|-----|---------------------------------------|
| 127 | GO_RNA_PROCESSING                                                              | 22  | - | 0.344 | -1.852 | 0.0235 | 0.035 | 0.987 | 458 | tags=82%,<br>list=47%,<br>signal=151% |
| 128 | GO_PROTEIN_CATABOLIC_PROCESS                                                   | 32  | - | 0.282 | -1.845 | 0.0066 | 0.036 | 0.987 | 316 | tags=59%,<br>list=32%,<br>signal=85%  |
| 129 | GO_ENDOPLASMIC_RETICULUM_PART                                                  | 88  | - | -0.19 | -1.842 | 0.0141 | 0.036 | 0.987 | 267 | tags=43%,<br>list=27%,<br>signal=54%  |
| 130 | GO_ORGANELLE_ASSEMBLY                                                          | 23  | - | -0.33 | -1.838 | 0.0199 | 0.037 | 0.988 | 299 | tags=61%,<br>list=31%,<br>signal=86%  |
| 131 | GO_IN_UTERO_EMBRYONIC_DEVELOPMENT                                              | 16  | - | 0.397 | -1.837 | 0.0128 | 0.037 | 0.989 | 466 | tags=88%,<br>list=48%,<br>signal=165% |
| 132 | GO_MONOCARBOXYLIC_ACID_METABOLIC_PROCESS                                       | 39  | - | 0.259 | -1.836 | 0.0149 | 0.037 | 0.989 | 102 | tags=28%,<br>list=10%,<br>signal=30%  |
| 133 | GO_AMIDE_BIOSYNTHETIC_PROCESS                                                  | 18  | - | 0.378 | -1.827 | 0.0253 | 0.038 | 0.992 | 379 | tags=78%,<br>list=39%,<br>signal=125% |
| 134 | GO_ENDOPLASMIC_RETICULUM_GO_EMBRYO_DEVELOPMENT_ENDING_IN_BIRTH_OR_EGG_HATCHING | 109 | - | 0.168 | -1.822 | 0.0162 | 0.039 | 0.993 | 257 | tags=39%,<br>list=26%,<br>signal=48%  |
| 135 |                                                                                | 31  | - | 0.287 | -1.817 | 0.0168 | 0.039 | 0.994 | 434 | tags=71%,<br>list=45%,<br>signal=124% |
| 136 | GO_CELLULAR_COMPONENT_DISASSEMBLY                                              | 32  | - | 0.289 | -1.814 | 0.0154 | 0.04  | 0.995 | 377 | tags=66%,<br>list=39%,<br>signal=104% |
| 137 | GO_SEXUAL_REPRODUCTION                                                         | 29  | - | 0.295 | -1.801 | 0.013  | 0.042 | 0.998 | 404 | tags=69%,<br>list=41%,<br>signal=114% |
| 138 | GO_ANCHORED_COMPONENT_OF_MEMBRANE                                              | 17  | - | -0.37 | -1.793 | 0.0195 | 0.044 | 0.998 | 43  | tags=29%,<br>list=4%,<br>signal=30%   |
| 139 | GO_MACROMOLECULE_CATABOLIC_PROCESS                                             | 44  | - | 0.242 | -1.785 | 0.0115 | 0.045 | 0.998 | 292 | tags=52%,<br>list=30%,<br>signal=71%  |
| 140 | GO_CELLULAR_LIPID_METABOLIC_PROCESS                                            | 62  | - | 0.213 | -1.778 | 0.0142 | 0.047 | 0.999 | 221 | tags=39%,<br>list=23%,<br>signal=47%  |

| Positive DEGs enrichment results in the C7 |                                                                                                                                                 |      |       |        |           |           |            |             |                                       |
|--------------------------------------------|-------------------------------------------------------------------------------------------------------------------------------------------------|------|-------|--------|-----------|-----------|------------|-------------|---------------------------------------|
| follow link to MSigDB                      |                                                                                                                                                 |      |       |        |           |           |            |             |                                       |
|                                            |                                                                                                                                                 | SIZE | ES    | NES    | NOM p-val | FDR q-val | FWER p-val | RANK AT MAX | LEADING EDGE                          |
| 1                                          | GSE41176_UNSTIM_VS_ANTI_IGM_STIM_BCELL_1H_DN                                                                                                    | 33   | 0.615 | 3.9353 | 0         | 0         | 0          | 295         | tags=88%,<br>list=30%,<br>signal=122% |
| 2                                          | GSE22140_GERMFREE_VS_SPF_ARTHRITIC_MOUSE_CD4_TCELL_DN<br>GSE19888_ADENOSINE_A3R_INH_PRETREAT_AND_ACT_BY_A3R_VS_TCELL_MEMBRANES_ACT_MAST_CELL_UP | 47   | 0.539 | 3.909  | 0         | 0         | 0          | 271         | tags=74%,<br>list=28%,<br>signal=98%  |
| 3                                          | GSE37533_PPARG1_FOXP3_VS_FOXP3_TRANSDUCE_CD4_TCELL_DN                                                                                           | 50   | 0.525 | 3.886  | 0         | 0         | 0          | 392         | tags=88%,<br>list=40%,<br>signal=140% |
| 4                                          |                                                                                                                                                 | 46   | 0.541 | 3.7998 | 0         | 0         | 0          | 401         | tags=91%,<br>list=41%,<br>signal=148% |



|    |                                                                      |    |       |        |   |   |   |     |                                       |
|----|----------------------------------------------------------------------|----|-------|--------|---|---|---|-----|---------------------------------------|
| 5  | GSE1432_CTRL_VS_IFNG_24H_MI<br>CROGLIA_DN                            | 51 | 0.503 | 3.7929 | 0 | 0 | 0 | 254 | tags=69%,<br>list=26%,<br>signal=88%  |
| 6  | GSE24634_IL4_VS_CTRL_TREATE<br>D_NAIVE_CD4_TCELL_DAY3_DN             | 52 | 0.504 | 3.7774 | 0 | 0 | 0 | 414 | tags=90%,<br>list=43%,<br>signal=149% |
| 7  | GSE13411_PLASMA_CELL_VS_ME<br>MORY_BCELL_DN                          | 43 | 0.543 | 3.7286 | 0 | 0 | 0 | 374 | tags=88%,<br>list=38%,<br>signal=137% |
| 8  | GSE42021_TREG_VS_TCONV_PLN_<br>UP                                    | 45 | 0.538 | 3.7248 | 0 | 0 | 0 | 401 | tags=91%,<br>list=41%,<br>signal=148% |
| 9  | GSE42021_CD24HI_VS_CD24LOW_<br>TCONV_THYMUS_DN                       | 47 | 0.495 | 3.6383 | 0 | 0 | 0 | 257 | tags=70%,<br>list=26%,<br>signal=91%  |
| 10 | GSE42021_CD24HI_VS_CD24INT_T<br>REG_THYMUS_DN                        | 44 | 0.506 | 3.6174 | 0 | 0 | 0 | 246 | tags=70%,<br>list=25%,<br>signal=90%  |
| 11 | GSE10325_LUPUS_CD4_TCELL_VS<br>_LUPUS_BCELL_DN                       | 50 | 0.484 | 3.6063 | 0 | 0 | 0 | 377 | tags=82%,<br>list=39%,<br>signal=127% |
| 12 | GSE1432_1H_VS_24H_IFNG_MICR<br>OGLIA_DN                              | 51 | 0.476 | 3.5995 | 0 | 0 | 0 | 257 | tags=67%,<br>list=26%,<br>signal=86%  |
| 13 | GSE1740_UNSTIM_VS_IFNA_STIM<br>ULATED_MCSF_DERIVED_MACR<br>OPHAGE_DN | 25 | 0.653 | 3.5389 | 0 | 0 | 0 | 257 | tags=88%,<br>list=26%,<br>signal=116% |
| 14 | GSE29618_PDC_VS_MDC_DAY7_F<br>LU_VACCINE_DN                          | 50 | 0.48  | 3.5339 | 0 | 0 | 0 | 426 | tags=88%,<br>list=44%,<br>signal=148% |
| 15 | GSE42021_TREG_PLN_VS_CD24IN<br>T_TREG_THYMUS_DN                      | 43 | 0.521 | 3.5272 | 0 | 0 | 0 | 257 | tags=72%,<br>list=26%,<br>signal=94%  |
| 16 | GSE36476_CTRL_VS_TSST_ACT_16<br>H_MEMORY_CD4_TCELL_YOUNG<br>_UP      | 31 | 0.574 | 3.4852 | 0 | 0 | 0 | 260 | tags=81%,<br>list=27%,<br>signal=107% |
| 17 | GSE7218_UNSTIM_VS_ANTIGEN_S<br>TIM_THROUGH_IGG_BCELL_DN              | 54 | 0.461 | 3.4789 | 0 | 0 | 0 | 367 | tags=80%,<br>list=38%,<br>signal=121% |
| 18 | GSE21063_WT_VS_NFATC1_KO_3<br>H_ANTI_IGM_STIM_BCELL_DN               | 38 | 0.515 | 3.4614 | 0 | 0 | 0 | 217 | tags=66%,<br>list=22%,<br>signal=81%  |
| 19 | GSE1791_CTRL_VS_NEUROMEDIN<br>U_IN_T_CELL_LINE_3H_UP                 | 27 | 0.622 | 3.4556 | 0 | 0 | 0 | 257 | tags=85%,<br>list=26%,<br>signal=113% |
| 20 | GSE37533_PPARG2_FOXP3_VS_FO<br>XP3_TRANSDUCECD_CD4_TCELL_<br>DN      | 46 | 0.481 | 3.4403 | 0 | 0 | 0 | 401 | tags=85%,<br>list=41%,<br>signal=137% |
| 21 | GSE41978_ID2_KO_VS_BIM_KO_K<br>LRG1_LOW_EFFECTOR_CD8_TCE<br>LL_UP    | 38 | 0.509 | 3.4267 | 0 | 0 | 0 | 305 | tags=76%,<br>list=31%,<br>signal=107% |
| 22 | GSE1432_CTRL_VS_IFNG_6H_MIC<br>ROGLIA_DN                             | 40 | 0.494 | 3.4132 | 0 | 0 | 0 | 411 | tags=88%,<br>list=42%,<br>signal=145% |
| 23 | GSE7509_UNSTIM_VS_FCGRIIB_ST<br>IM_DC_DN                             | 38 | 0.492 | 3.3812 | 0 | 0 | 0 | 342 | tags=79%,<br>list=35%,<br>signal=117% |
| 24 | GSE22140_GERMFREE_VS_SPF_M<br>OUSE_CD4_TCELL_UP                      | 40 | 0.503 | 3.3659 | 0 | 0 | 0 | 305 | tags=75%,<br>list=31%,<br>signal=105% |

|    |                                                                                            |    |       |        |   |       |       |     |                                                                                |
|----|--------------------------------------------------------------------------------------------|----|-------|--------|---|-------|-------|-----|--------------------------------------------------------------------------------|
| 25 | GSE19888_ADENOSINE_A3R_INH_VS_ACT_WITH_INHIBITOR_PRETR<br>EATMENT_IN_MAST_CELL_UP          | 34 | 0.542 | 3.3481 | 0 | 0     | 0     | 392 | tags=91%,<br>list=40%,<br>signal=147%                                          |
| 26 | GSE37533_PPARG1_FOXP3_VS_PP<br>ARG2_FOXP3_TRANSDUCECD4<br>TCELL_PIOGLITAZONE_TREAT<br>D_DN | 42 | 0.493 | 3.3409 | 0 | 0     | 0     | 401 | tags=86%,<br>list=41%,<br>signal=139%<br>tags=85%,<br>list=43%,<br>signal=142% |
| 27 | GSE29618_PDC_VS_MDC_DN                                                                     | 47 | 0.461 | 3.3219 | 0 | 0     | 0     | 419 | tags=70%,<br>list=27%,<br>signal=92%                                           |
| 28 | GSE7509_UNSTIM_VS_IFNA_STIM<br>IMMATURE_DC_DN                                              | 37 | 0.51  | 3.3009 | 0 | 0     | 0     | 259 | tags=88%,<br>list=33%,<br>signal=128%                                          |
| 29 | GSE43863_NAIVE_VS_MEMORY_T<br>H1_CD4_TCELL_D150_LCMV_UP                                    | 26 | 0.591 | 3.2868 | 0 | 0     | 0     | 321 | tags=88%,<br>list=42%,<br>signal=146%                                          |
| 30 | GSE29618_MONOCYTE_VS_PDC_U<br>P                                                            | 40 | 0.491 | 3.251  | 0 | 0     | 0     | 413 | tags=86%,<br>list=42%,<br>signal=141%                                          |
| 31 | GSE22886_CTRL_VS_LPS_24H_DC_<br>DN                                                         | 43 | 0.474 | 3.2507 | 0 | 0     | 0     | 407 | tags=89%,<br>list=43%,<br>signal=150%                                          |
| 32 | GSE24634_IL4_VS_CTRL_TREAT<br>D_NAIVE_CD4_TCELL_DAY5_DN                                    | 38 | 0.497 | 3.2451 | 0 | 0     | 0     | 414 | tags=74%,<br>list=31%,<br>signal=104%                                          |
| 33 | GSE13485_PRE_VS_POST_YF17D_<br>VACCINATION_PBMCDN                                          | 39 | 0.484 | 3.2446 | 0 | 0     | 0     | 305 | tags=84%,<br>list=40%,<br>signal=135%                                          |
| 34 | GSE13485_CTRL_VS_DAY7_YF17D<br>_VACCINE_PBMCDN                                             | 45 | 0.464 | 3.242  | 0 | 0     | 0     | 392 | tags=87%,<br>list=40%,<br>signal=140%                                          |
| 35 | GSE13485_CTRL_VS_DAY3_YF17D<br>_VACCINE_PBMCDN                                             | 38 | 0.498 | 3.2379 | 0 | 0     | 0     | 392 | tags=86%,<br>list=42%,<br>signal=142%                                          |
| 36 | GSE10325_LUPUS_CD4_TCELL_VS<br>LUPUS_MYELOID_DN                                            | 42 | 0.475 | 3.2333 | 0 | 0     | 0     | 410 | tags=96%,<br>list=38%,<br>signal=151%                                          |
| 37 | GSE1112_HY_CD8AB_VS_HY_CD8<br>AA_THYMOCYTE_RTOC_CULTUR<br>E_UP                             | 24 | 0.602 | 3.2053 | 0 | 0     | 0     | 370 | tags=58%,<br>list=17%,<br>signal=68%                                           |
| 38 | GSE16266_LPS_VS_HEATSHOCK_<br>AND_LPS_STIM_MEF_UP                                          | 36 | 0.481 | 3.1568 | 0 | 0     | 0     | 170 | tags=79%,<br>list=26%,<br>signal=105%                                          |
| 39 | GSE2770_IL12_AND_TGFB_VS_IL4<br>TREATED_ACT_CD4_TCELL_48H<br>DN                            | 24 | 0.579 | 3.1535 | 0 | 0     | 0     | 257 | tags=54%,<br>list=17%,<br>signal=62%                                           |
| 40 | GSE32164_ALTERNATIVELY_ACT<br>M2_VS_CMYC_INHIBITED_MACR<br>OPHAGE_UP                       | 41 | 0.45  | 3.1198 | 0 | 0     | 0     | 170 | tags=90%,<br>list=52%,<br>signal=175%                                          |
| 41 | GSE3039_NKT_CELL_VS_ALPHAA<br>LPHA_CD8_TCELL_DN                                            | 58 | 0.405 | 3.1162 | 0 | 0     | 0     | 506 | tags=92%,<br>list=52%,<br>signal=181%                                          |
| 42 | GSE10325_LUPUS_CD4_TCELL_VS<br>LUPUS_BCELL_UP                                              | 48 | 0.424 | 3.1126 | 0 | 0     | 0     | 505 | tags=53%,<br>list=14%,<br>signal=59%                                           |
| 43 | GSE17301_ACD3_ACD28_VS_ACD3<br>ACD28_AND_IFNA5_STIM_CD8_T<br>CELL_DN                       | 38 | 0.477 | 3.0828 | 0 | 0     | 0     | 132 | tags=74%,<br>list=18%,<br>signal=88%                                           |
| 44 | GSE32533_MIR17_KO_VS_MIR17_O<br>VEREXPRESS_ACT_CD4_TCELL_D<br>N                            | 19 | 0.621 | 3.0691 | 0 | ##### | 0.001 | 175 |                                                                                |

|    |                                                                                              |    |       |        |   |           |       |     |                                       |
|----|----------------------------------------------------------------------------------------------|----|-------|--------|---|-----------|-------|-----|---------------------------------------|
| 45 | GSE36826_WT_VS_IL1R_KO_SKIN_UP                                                               | 39 | 0.46  | 3.0677 | 0 | ####<br># | 0.001 | 440 | tags=90%,<br>list=45%,<br>signal=157% |
| 46 | GSE42021_CD24HI_VS_CD24INT_T<br>CONV_THYMUS_DN                                               | 33 | 0.488 | 3.0491 | 0 | ####<br># | 0.001 | 267 | tags=70%,<br>list=27%,<br>signal=93%  |
| 47 | GSE29164_UNTREATED_VS_CD8<br>TCELL_TREATED_MELANOMA_D<br>AY7_UP                              | 36 | 0.471 | 3.038  | 0 | ####<br># | 0.001 | 162 | tags=56%,<br>list=17%,<br>signal=64%  |
| 48 | GSE2128_CTRL_VS_MIMETOPE_N<br>EGATIVE_SELECTION_DP_THYM<br>OCYTE_NOD_UP                      | 30 | 0.501 | 3.0371 | 0 | ####<br># | 0.001 | 173 | tags=60%,<br>list=18%,<br>signal=71%  |
| 49 | GSE22886_NAIVE_TCELL_VS_DC<br>UP                                                             | 36 | 0.468 | 3.0368 | 0 | ####<br># | 0.001 | 437 | tags=89%,<br>list=45%,<br>signal=155% |
| 50 | GSE10325_CD4_TCELL_VS_BCELL<br>UP                                                            | 53 | 0.403 | 3.0366 | 0 | ####<br># | 0.001 | 344 | tags=70%,<br>list=35%,<br>signal=102% |
| 51 | GSE10325_CD4_TCELL_VS_MYEL<br>OID_DN                                                         | 47 | 0.427 | 3.0363 | 0 | ####<br># | 0.001 | 394 | tags=81%,<br>list=40%,<br>signal=129% |
| 52 | GSE41087_WT_VS_FOXP3_MUT_A<br>NTI_CD3_CD28_STIM_CD4_TCELL<br>UP                              | 36 | 0.478 | 3.0295 | 0 | ####<br># | 0.001 | 383 | tags=83%,<br>list=39%,<br>signal=132% |
| 53 | GSE10325_CD4_TCELL_VS_BCELL<br>DN                                                            | 55 | 0.394 | 3.029  | 0 | ####<br># | 0.001 | 479 | tags=85%,<br>list=49%,<br>signal=159% |
| 54 | GSE24026_PD1_LIGATION_VS_CT<br>RL_IN_ACT_TCELL_LINE_UP                                       | 49 | 0.416 | 3.022  | 0 | ####<br># | 0.001 | 302 | tags=67%,<br>list=31%,<br>signal=93%  |
| 55 | GSE42021_TREG_PLN_VS_TREG_P<br>RECURSORS_THYMUS_DN                                           | 42 | 0.437 | 3.021  | 0 | ####<br># | 0.001 | 401 | tags=81%,<br>list=41%,<br>signal=132% |
| 56 | GSE25123_WT_VS_PPARG_KO_MA<br>CROPHAGE_DN                                                    | 28 | 0.518 | 3.0052 | 0 | ####<br># | 0.002 | 224 | tags=68%,<br>list=23%,<br>signal=86%  |
| 57 | GSE13485_DAY3_VS_DAY7_YF17D<br>_VACCINE_PBMC_DN                                              | 40 | 0.447 | 3.0007 | 0 | ####<br># | 0.002 | 305 | tags=73%,<br>list=31%,<br>signal=101% |
| 58 | GSE15330_LYMPHOID_MULTIPOT<br>ENT_VS_MEGAKARYOCYTE_ERY<br>THROID_PROGENITOR_IKAROS_K<br>O_DN | 32 | 0.491 | 2.9952 | 0 | ####<br># | 0.002 | 254 | tags=69%,<br>list=26%,<br>signal=90%  |
| 59 | GSE21546_WT_VS_SAP1A_KO_DP_<br>THYMOCYTES_UP                                                 | 37 | 0.463 | 2.9908 | 0 | ####<br># | 0.002 | 401 | tags=84%,<br>list=41%,<br>signal=137% |
| 60 | GSE42021_TREG_PLN_VS_CD24LO<br>_TREG_THYMUS_DN                                               | 35 | 0.474 | 2.9791 | 0 | ####<br># | 0.002 | 305 | tags=74%,<br>list=31%,<br>signal=104% |
| 61 | GSE18791_UNSTIM_VS_NEWCATS<br>LE_VIRUS_DC_6H_DN                                              | 30 | 0.505 | 2.9777 | 0 | ####<br># | 0.002 | 305 | tags=77%,<br>list=31%,<br>signal=108% |
| 62 | GSE10325_LUPUS_CD4_TCELL_VS<br>_LUPUS_MYELOID_UP                                             | 42 | 0.434 | 2.9727 | 0 | ####<br># | 0.002 | 541 | tags=98%,<br>list=56%,<br>signal=210% |
| 63 | GSE13522_CTRL_VS_T_CRUZI_Y_S<br>TRAIN_INF_SKIN_IFNAR_KO_UP                                   | 26 | 0.529 | 2.9661 | 0 | ####<br># | 0.002 | 379 | tags=88%,<br>list=39%,<br>signal=141% |
| 64 | GSE360_L_DONOVANI_VS_M_TUB<br>ERCULOSIS_MAC_DN                                               | 29 | 0.507 | 2.9602 | 0 | ####<br># | 0.002 | 321 | tags=79%,<br>list=33%,<br>signal=115% |

|    |                                                                                     |    |       |        |   |           |       |     |                                                                                                                         |
|----|-------------------------------------------------------------------------------------|----|-------|--------|---|-----------|-------|-----|-------------------------------------------------------------------------------------------------------------------------|
| 65 | GSE17974_IL4_AND_ANTI_IL12_VS_UNTREATED_72H_ACT_CD4_TCELL_LL_DN                     | 33 | 0.486 | 2.9571 | 0 | ####<br># | 0.002 | 239 | tags=67%,<br>list=25%,<br>signal=85%                                                                                    |
| 66 | GSE37534_UNTREATED_VS_PIOGLITAZONE_TREATED_CD4_TCELL_PPARG1_AND_FOXP3_TRASDUCE_D_DN | 36 | 0.463 | 2.9488 | 0 | ####<br># | 0.002 | 246 | tags=67%,<br>list=25%,<br>signal=86%<br>tags=76%,<br>list=38%,<br>signal=116%                                           |
| 67 | GSE24634_TEFF_VS_TCONV_DAY3_IN_CULTURE_DN                                           | 45 | 0.425 | 2.9452 | 0 | ####<br># | 0.002 | 370 | tags=69%,<br>list=25%,<br>signal=89%                                                                                    |
| 68 | GSE23505_UNTREATED_VS_4DAY_IL6_IL1_IL23_TREATED_CD4_TCELL_DN                        | 29 | 0.507 | 2.9334 | 0 | ####<br># | 0.002 | 242 | tags=66%,<br>list=25%,<br>signal=85%<br>tags=79%,<br>list=27%,<br>signal=105%                                           |
| 69 | GSE7218_IGM_VS_IGG_SIGNAL_T_HGOUGH_ANTIGEN_BCELL_DN                                 | 35 | 0.453 | 2.9334 | 0 | ####<br># | 0.002 | 244 | tags=79%,<br>list=27%,<br>signal=105%                                                                                   |
| 70 | GSE1740_MCSF_VS_MCSF_AND_IFNG_DAY2_DERIVED_MACROPHAGE_UP                            | 24 | 0.556 | 2.9334 | 0 | ####<br># | 0.002 | 259 | tags=64%,<br>list=23%,<br>signal=80%<br>tags=76%,<br>list=25%,<br>signal=98%                                            |
| 71 | GSE20715_0H_VS_24H_OZONE_LUNG_UP                                                    | 33 | 0.475 | 2.9197 | 0 | ####<br># | 0.002 | 227 | tags=76%,<br>list=25%,<br>signal=98%<br>tags=70%,<br>list=26%,<br>signal=91%                                            |
| 72 | GSE19401_UNSTIM_VS_RETINOIC_ACID_STIM_FOLLICULAR_DC_UP                              | 25 | 0.543 | 2.9112 | 0 | ####<br># | 0.002 | 240 | tags=100%,<br>list=56%,<br>signal=217%<br>tags=56%,<br>list=17%,<br>signal=65%<br>tags=87%,<br>list=41%,<br>signal=142% |
| 73 | GSE37301_MULTIPOTENT_PROGENITOR_VS_GRAN_MONO_PROGENITOR_DN                          | 30 | 0.495 | 2.9099 | 0 | ####<br># | 0.002 | 250 | tags=53%,<br>list=15%,<br>signal=60%<br>tags=84%,<br>list=39%,<br>signal=134%                                           |
| 74 | GSE22886_NAIVE_CD8_TCELL_VS_MONOCYTE_DN                                             | 35 | 0.459 | 2.9012 | 0 | ####<br># | 0.002 | 542 | tags=67%,<br>list=23%,<br>signal=84%<br>tags=94%,<br>list=51%,<br>signal=184%                                           |
| 75 | GSE32164_RESTING_DIFFERENTIATED_VS_ALTERNATIVELY_ACTIVATED_M2_MACROPHAGE_DN         | 34 | 0.464 | 2.8992 | 0 | ####<br># | 0.002 | 170 | tags=92%,<br>list=49%,<br>signal=172%<br>tags=96%,<br>list=44%,<br>signal=167%                                          |
| 76 | GSE18791_CTRL_VS_NEWCASTLE_VIRUS_DC_8H_DN                                           | 30 | 0.495 | 2.898  | 0 | ####<br># | 0.002 | 396 | tags=73%,<br>list=31%,<br>signal=101%<br>tags=100%,<br>list=38%,<br>signal=159%                                         |
| 77 | GOLDRATH_NAIVE_VS_MEMORY_CD8_TCELL_DN                                               | 34 | 0.459 | 2.8919 | 0 | ####<br># | 0.003 | 142 |                                                                                                                         |
| 78 | GSE33292_DN3_THYMOCYTE_VS_TCF1_KO_TCELL_LYMPHOMA_UP                                 | 31 | 0.475 | 2.8853 | 0 | ####<br># | 0.003 | 382 |                                                                                                                         |
| 79 | GSE19888_ADENOSINE_A3R_ACT_VS_TCELL_MEMBRANES_ACT_IN_MAST_CELL_UP                   | 30 | 0.493 | 2.8793 | 0 | ####<br># | 0.003 | 222 |                                                                                                                         |
| 80 | GSE43863_DAY6_EFF_VS_DAY150_MEM_LY6C_INT_CXCR5POS_CD4_TCELL_DN                      | 34 | 0.455 | 2.8748 | 0 | ####<br># | 0.003 | 494 |                                                                                                                         |
| 81 | GSE29618_BCELL_VS_MONOCYTE_DAY7_FLU_VACCINE_UP                                      | 36 | 0.447 | 2.8701 | 0 | ####<br># | 0.004 | 473 |                                                                                                                         |
| 82 | GSE2706_UNSTIM_VS_8H_LPS_AND_R848_DC_DN                                             | 24 | 0.533 | 2.8638 | 0 | ####<br># | 0.004 | 428 |                                                                                                                         |
| 83 | GSE22886_NAIVE_BCELL_VS_NEUTROPHIL_DN                                               | 37 | 0.435 | 2.8593 | 0 | ####<br># | 0.004 | 299 |                                                                                                                         |
| 84 | GSE2770_IL12_AND_TGFB_VS_IL4_TREATED_ACT_CD4_TCELL_48H_UP                           | 16 | 0.626 | 2.8517 | 0 | ####<br># | 0.005 | 373 |                                                                                                                         |

|     |                                                                                |    |       |        |   |           |       |     |                                       |
|-----|--------------------------------------------------------------------------------|----|-------|--------|---|-----------|-------|-----|---------------------------------------|
| 85  | GSE21774_CD62L_POS_CD56_BRIG<br>HT_VS_CD62L_NEG_CD56_DIM_N<br>K_CELL_UP        | 26 | 0.51  | 2.8505 | 0 | ####<br># | 0.005 | 379 | tags=88%,<br>list=39%,<br>signal=141% |
| 86  | GSE42088_2H_VS_24H_LEISHMANI<br>A_INF_DC_UP                                    | 36 | 0.444 | 2.8497 | 0 | ####<br># | 0.005 | 386 | tags=81%,<br>list=40%,<br>signal=129% |
| 87  | GSE21546_UNSTIM_VS_ANTI_CD3<br>_STIM_SAP1A_KO_AND_ELK1_KO<br>_DP_THYMOCYTES_UP | 16 | 0.629 | 2.8493 | 0 | ####<br># | 0.005 | 321 | tags=94%,<br>list=33%,<br>signal=138% |
| 88  | GSE20715_0H_VS_48H_OZONE_LU<br>NG_UP                                           | 25 | 0.524 | 2.8388 | 0 | ####<br># | 0.005 | 283 | tags=76%,<br>list=29%,<br>signal=104% |
| 89  | GSE1432_1H_VS_6H_IFNG_MICRO<br>GLIA_DN                                         | 30 | 0.47  | 2.8345 | 0 | ####<br># | 0.005 | 254 | tags=67%,<br>list=26%,<br>signal=87%  |
| 90  | GSE41867_DAY15_EFFECTOR_VS_<br>DAY30_EXHAUSTED_CD8_TCELL<br>_LCMV_CLONE13_UP   | 25 | 0.522 | 2.834  | 0 | ####<br># | 0.005 | 380 | tags=88%,<br>list=39%,<br>signal=141% |
| 91  | GSE3982_CTRL_VS_LPS_4H_MAC_<br>DN                                              | 32 | 0.463 | 2.8338 | 0 | ####<br># | 0.005 | 239 | tags=66%,<br>list=25%,<br>signal=84%  |
| 92  | GSE42021_TCONV_PLN_VS_CD24H<br>I_TCONV_THYMUS_UP                               | 35 | 0.442 | 2.8207 | 0 | ####<br># | 0.006 | 257 | tags=66%,<br>list=26%,<br>signal=86%  |
| 93  | GSE22886_NAIVE_VS_IGG_IGA_M<br>EMORY_BCELL_DN                                  | 32 | 0.463 | 2.8179 | 0 | ####<br># | 0.006 | 327 | tags=75%,<br>list=34%,<br>signal=109% |
| 94  | GSE12845_PRE_GC_VS_DARKZON<br>E_GC_TONSIL_BCELL_UP                             | 36 | 0.438 | 2.8135 | 0 | ####<br># | 0.006 | 385 | tags=81%,<br>list=40%,<br>signal=128% |
| 95  | GSE5589_LPS_AND_IL10_VS_LPS_<br>AND_IL6_STIM_IL6_KO_MACROP<br>HAGE_45MIN_UP    | 41 | 0.411 | 2.8095 | 0 | ####<br># | 0.006 | 381 | tags=76%,<br>list=39%,<br>signal=119% |
| 96  | GSE22886_DAY0_VS_DAY7_MONO<br>CYTE_IN_CULTURE_UP                               | 40 | 0.412 | 2.7985 | 0 | ####<br># | 0.007 | 412 | tags=83%,<br>list=42%,<br>signal=137% |
| 97  | GSE21360_PRIMARY_VS_TERTIAR<br>Y_MEMORY_CD8_TCELL_DN                           | 46 | 0.395 | 2.7908 | 0 | ####<br># | 0.009 | 428 | tags=78%,<br>list=44%,<br>signal=133% |
| 98  | GSE7460_CD8_TCELL_VS_CD4_TC<br>ELL_ACT_UP                                      | 30 | 0.462 | 2.7809 | 0 | ####<br># | 0.011 | 254 | tags=67%,<br>list=26%,<br>signal=87%  |
| 99  | GSE10325_CD4_TCELL_VS_MYEL<br>OID_UP                                           | 49 | 0.38  | 2.7739 | 0 | ####<br># | 0.012 | 546 | tags=92%,<br>list=56%,<br>signal=198% |
| 100 | GSE3982_MAST_CELL_VS_NKCEL<br>L_DN                                             | 27 | 0.485 | 2.772  | 0 | ####<br># | 0.013 | 421 | tags=89%,<br>list=43%,<br>signal=152% |
| 101 | GSE15767_MED_VS_SCS_MAC_LN<br>_UP                                              | 29 | 0.464 | 2.7532 | 0 | ####<br># | 0.014 | 384 | tags=83%,<br>list=39%,<br>signal=133% |
| 102 | GSE22886_NAIVE_CD8_TCELL_VS<br>_MONOCYTE_UP                                    | 60 | 0.347 | 2.7466 | 0 | ####<br># | 0.015 | 541 | tags=88%,<br>list=56%,<br>signal=186% |
| 103 | GSE13484_UNSTIM_VS_YF17D_VA<br>CCINE_STIM_PBMC_DN                              | 38 | 0.414 | 2.7449 | 0 | ####<br># | 0.015 | 401 | tags=79%,<br>list=41%,<br>signal=129% |
| 104 | GSE2770_TGFB_AND_IL4_ACT_VS<br>_ACT_CD4_TCELL_2H_DN                            | 28 | 0.476 | 2.7402 | 0 | ####<br># | 0.016 | 426 | tags=89%,<br>list=44%,<br>signal=154% |

|     |                                                                                    |    |       |        |        |           |       |     |                                       |
|-----|------------------------------------------------------------------------------------|----|-------|--------|--------|-----------|-------|-----|---------------------------------------|
| 105 | GSE1432_CTRL_VS_IFNG_1H_MIC<br>ROGLIA_DN                                           | 21 | 0.527 | 2.7374 | 0      | ####<br># | 0.017 | 237 | tags=71%,<br>list=24%,<br>signal=92%  |
| 106 | GSE2405_HEAT_KILLED_LYSATE<br>VS_LIVE_A_PHAGOCYTOPHILUM<br>_STIM_NEUTROPHIL_24H_UP | 26 | 0.496 | 2.731  | 0      | ####<br># | 0.017 | 159 | tags=58%,<br>list=16%,<br>signal=67%  |
| 107 | GSE22886_TCELL_VS_BCELL_NAI<br>VE_UP                                               | 56 | 0.353 | 2.7299 | 0      | ####<br># | 0.017 | 458 | tags=79%,<br>list=47%,<br>signal=140% |
| 108 | GSE22196_HEALTHY_VS_OBESE_<br>MOUSE_SKIN_GAMMADDELTA_TC<br>ELL_UP                  | 41 | 0.411 | 2.729  | 0      | ####<br># | 0.017 | 117 | tags=44%,<br>list=12%,<br>signal=48%  |
| 109 | GSE30083_SP2_VS_SP4_THYMOCY<br>TE_DN                                               | 27 | 0.48  | 2.7263 | 0      | ####<br># | 0.017 | 384 | tags=85%,<br>list=39%,<br>signal=137% |
| 110 | GSE18791_UNSTIM_VS_NEWCATS<br>LE_VIRUS_DC_10H_DN                                   | 27 | 0.487 | 2.7229 | 0      | ####<br># | 0.017 | 392 | tags=85%,<br>list=40%,<br>signal=139% |
| 111 | GSE360_L_DONOVANI_VS_B_MAL<br>AYI_HIGH_DOSE_MAC_DN                                 | 28 | 0.468 | 2.7179 | 0      | ####<br># | 0.017 | 235 | tags=64%,<br>list=24%,<br>signal=82%  |
| 112 | GSE22886_CD4_TCELL_VS_BCELL<br>_NAIVE_UP                                           | 44 | 0.396 | 2.7176 | 0      | ####<br># | 0.017 | 541 | tags=93%,<br>list=56%,<br>signal=200% |
| 113 | GSE22886_NAIVE_VS_IGM_MEMO<br>RY_BCELL_DN                                          | 33 | 0.44  | 2.7154 | 0      | ####<br># | 0.017 | 419 | tags=85%,<br>list=43%,<br>signal=144% |
| 114 | GSE18791_CTRL_VS_NEWCASTLE<br>_VIRUS_DC_18H_DN                                     | 25 | 0.492 | 2.7104 | 0      | ####<br># | 0.02  | 396 | tags=88%,<br>list=41%,<br>signal=144% |
| 115 | GSE16385_ROSIGLITAZONE_IL4_V<br>S_IFNG_TNF_STIM_MACROPHAG<br>E_UP                  | 24 | 0.5   | 2.7095 | 0      | ####<br># | 0.021 | 291 | tags=75%,<br>list=30%,<br>signal=104% |
| 116 | GSE24634_TREG_VS_TCONV_POS<br>T_DAY10_IL4_CONVERSION_DN                            | 36 | 0.416 | 2.6999 | 0.0018 | ####<br># | 0.021 | 310 | tags=69%,<br>list=32%,<br>signal=98%  |
| 117 | GSE46606_UNSTIM_VS_CD40L_IL2<br>_IL5_1DAY_STIMULATED_IRF4_K<br>O_BCELL_UP          | 23 | 0.507 | 2.6916 | 0      | ####<br># | 0.024 | 305 | tags=78%,<br>list=31%,<br>signal=111% |
| 118 | GSE22886_NAIVE_BCELL_VS_MO<br>NOCYTE_DN                                            | 29 | 0.451 | 2.6908 | 0      | ####<br># | 0.024 | 413 | tags=86%,<br>list=42%,<br>signal=145% |
| 119 | GSE21670_UNTREATED_VS_IL6_T<br>REATED_STAT3_KO_CD4_TCELL_<br>UP                    | 33 | 0.43  | 2.6902 | 0      | ####<br># | 0.024 | 386 | tags=79%,<br>list=40%,<br>signal=126% |
| 120 | GSE2706_UNSTIM_VS_8H_R848_D<br>C_DN                                                | 27 | 0.477 | 2.688  | 0      | ####<br># | 0.026 | 426 | tags=89%,<br>list=44%,<br>signal=154% |
| 121 | GSE1460_INTRATHYMIC_T_PROG<br>ENITOR_VS_CD4_THYMOCYTE_D<br>N                       | 58 | 0.334 | 2.6865 | 0      | ####<br># | 0.027 | 537 | tags=86%,<br>list=55%,<br>signal=181% |
| 122 | GSE6259_FLT3L_INDUCED_DEC20<br>5_POS_DC_VS_CD8_TCELL_DN                            | 21 | 0.524 | 2.6834 | 0      | ####<br># | 0.028 | 384 | tags=90%,<br>list=39%,<br>signal=146% |
| 123 | GSE40685_TREG_VS_FOXP3_KO_T<br>REG_PRECURSOR_DN                                    | 35 | 0.425 | 2.6771 | 0      | ####<br># | 0.03  | 399 | tags=80%,<br>list=41%,<br>signal=131% |
| 124 | GSE13411_IGM_MEMORY_BCELL_<br>VS_PLASMA_CELL_UP                                    | 28 | 0.473 | 2.6683 | 0      | ####<br># | 0.03  | 462 | tags=93%,<br>list=47%,<br>signal=172% |

|     |                                                                          |    |       |        |   |           |       |     |                                       |
|-----|--------------------------------------------------------------------------|----|-------|--------|---|-----------|-------|-----|---------------------------------------|
| 125 | GSE33374_CD8_ALPHAALPHA_VS_ALPHABETA_CD161_HIGH_TCELL_DN                 | 40 | 0.396 | 2.6679 | 0 | ####<br># | 0.03  | 441 | tags=83%,<br>list=45%,<br>signal=145% |
| 126 | GSE21546_SAPIA_KO_VS_SAPIA_KO_AND_ELK1_KO_ANTI_CD3_STIM_DP_THYMOCYTES_DN | 22 | 0.517 | 2.6667 | 0 | ####<br># | 0.03  | 329 | tags=82%,<br>list=34%,<br>signal=121% |
| 127 | GSE24634_TREG_VS_TCONV_POS_T_DAY5_IL4_CONVERSION_DN                      | 41 | 0.39  | 2.6621 | 0 | ####<br># | 0.031 | 272 | tags=63%,<br>list=28%,<br>signal=84%  |
| 128 | GSE23568_CTRL_TRANSDUCED_VS_WT_CD8_TCELL_DN                              | 46 | 0.373 | 2.6604 | 0 | ####<br># | 0.034 | 465 | tags=83%,<br>list=48%,<br>signal=151% |
| 129 | GSE36078_WT_VS_IL1R_KO_LUNG_DC_DN                                        | 25 | 0.482 | 2.6502 | 0 | ####<br># | 0.036 | 354 | tags=80%,<br>list=36%,<br>signal=122% |
| 130 | GSE36476_CTRL_VS_TSST_ACT_72H_MEMORY_CD4_TCELL_YOUNG_UP                  | 22 | 0.501 | 2.6446 | 0 | ####<br># | 0.037 | 337 | tags=82%,<br>list=35%,<br>signal=122% |
| 131 | GSE24142_EARLY_THYMIC_PROGENITOR_VS_DN2_THYMOCYTE_FATAL_DN               | 22 | 0.504 | 2.6436 | 0 | ####<br># | 0.037 | 332 | tags=82%,<br>list=34%,<br>signal=121% |
| 132 | GSE14000_UNSTIM_VS_4H_LPS_DC_TRANSLATED_RNA_DN                           | 30 | 0.447 | 2.6432 | 0 | ####<br># | 0.037 | 394 | tags=83%,<br>list=40%,<br>signal=136% |
| 133 | GSE3982_MEMORY_CD4_TCELL_VS_BCELL_UP                                     | 42 | 0.38  | 2.6426 | 0 | ####<br># | 0.037 | 465 | tags=83%,<br>list=48%,<br>signal=153% |
| 134 | GSE17580_TREG_VS_TEFF_S_MANSONI_INF_DN                                   | 24 | 0.489 | 2.6378 | 0 | ####<br># | 0.039 | 365 | tags=83%,<br>list=37%,<br>signal=130% |
| 135 | GSE33424_CD161_INT_VS_NEG_CD8_TCELL_UP                                   | 29 | 0.453 | 2.6373 | 0 | ####<br># | 0.039 | 392 | tags=83%,<br>list=40%,<br>signal=134% |
| 136 | GSE360_L_DONOVANI_VS_M_TUBERCULOSIS_DC_DN                                | 28 | 0.462 | 2.6343 | 0 | ####<br># | 0.04  | 268 | tags=71%,<br>list=28%,<br>signal=96%  |
| 137 | GSE360_DC_VS_MAC_M_TUBERCULOSIS_UP                                       | 42 | 0.376 | 2.6296 | 0 | ####<br># | 0.041 | 364 | tags=69%,<br>list=37%,<br>signal=105% |
| 138 | GSE22140_HEALTHY_VS_ARTHRTIC_GERMFREE_MOUSE_CD4_TCELL_UP                 | 34 | 0.417 | 2.6263 | 0 | ####<br># | 0.042 | 257 | tags=62%,<br>list=26%,<br>signal=81%  |
| 139 | GSE18791_UNSTIM_VS_NEWCATS_LE_VIRUS_DC_18H_DN                            | 19 | 0.534 | 2.6256 | 0 | ####<br># | 0.042 | 254 | tags=74%,<br>list=26%,<br>signal=98%  |
| 140 | GSE3982_CENT_MEMORY_CD4_TCELL_VS_NKCELL_DN                               | 33 | 0.428 | 2.6233 | 0 | ####<br># | 0.043 | 268 | tags=64%,<br>list=28%,<br>signal=85%  |
| 141 | GSE23925_LIGHT_ZONE_VS_NAIVE_BCELL_UP                                    | 27 | 0.464 | 2.621  | 0 | ####<br># | 0.044 | 344 | tags=78%,<br>list=35%,<br>signal=117% |
| 142 | GSE21360_NAIVE_VS_QUATERNARY_MEMORY_CD8_TCELL_UP                         | 23 | 0.492 | 2.6132 | 0 | ####<br># | 0.047 | 396 | tags=87%,<br>list=41%,<br>signal=143% |
| 143 | GSE360_T_GONDII_VS_M_TUBERCULOSIS_DC_DN                                  | 28 | 0.446 | 2.6059 | 0 | ####<br># | 0.049 | 289 | tags=71%,<br>list=30%,<br>signal=99%  |
| 144 | GSE24210_CTRL_VS_IL35_TREATED_TCONV_CD4_TCELL_UP                         | 16 | 0.573 | 2.5991 | 0 | ####<br># | 0.052 | 226 | tags=75%,<br>list=23%,<br>signal=96%  |

|     |                                                                             |    |       |        |        |           |       |     |                                       |
|-----|-----------------------------------------------------------------------------|----|-------|--------|--------|-----------|-------|-----|---------------------------------------|
| 145 | GSE2706_UNSTIM_VS_2H_R848_D<br>C_DN                                         | 25 | 0.474 | 2.5962 | 0      | ####<br># | 0.055 | 254 | tags=68%,<br>list=26%,<br>signal=90%  |
| 146 | GSE17974_IL4_AND_ANTI_IL12_VS<br>UNTREATED_48H_ACT_CD4_TCE<br>LL_DN         | 23 | 0.488 | 2.5928 | 0      | ####<br># | 0.056 | 397 | tags=87%,<br>list=41%,<br>signal=143% |
| 147 | GSE41867_DAY6_EFFECTOR_VS_D<br>AY30_EXHAUSTED_CD8_TCELL_L<br>CMV_CLONE13_UP | 22 | 0.493 | 2.5881 | 0      | ####<br># | 0.059 | 384 | tags=86%,<br>list=39%,<br>signal=139% |
| 148 | GSE7852_TREG_VS_TCONV_THY<br>MUS_UP                                         | 15 | 0.592 | 2.587  | 0      | ####<br># | 0.062 | 246 | tags=80%,<br>list=25%,<br>signal=105% |
| 149 | GSE22886_NAIVE_BCELL_VS_BLO<br>OD_PLASMA_CELL_UP                            | 37 | 0.403 | 2.5858 | 0      | ####<br># | 0.062 | 320 | tags=70%,<br>list=33%,<br>signal=101% |
| 150 | GSE3565_CTRL_VS_LPS_INJECTED<br>_DUSP1_KO_SPLENOCYTES_UP                    | 32 | 0.412 | 2.5856 | 0      | ####<br># | 0.062 | 159 | tags=50%,<br>list=16%,<br>signal=58%  |
| 151 | GSE3982_MAST_CELL_VS_BCELL_<br>DN                                           | 27 | 0.447 | 2.5807 | 0      | ####<br># | 0.065 | 479 | tags=93%,<br>list=49%,<br>signal=177% |
| 152 | GSE1460_DP_VS_CD4_THYMOCYT<br>E_DN                                          | 40 | 0.378 | 2.5801 | 0      | ####<br># | 0.067 | 396 | tags=75%,<br>list=41%,<br>signal=121% |
| 153 | GSE13485_DAY1_VS_DAY7_YF17D<br>_VACCINE_PBMC_DN                             | 37 | 0.391 | 2.5798 | 0      | ####<br># | 0.068 | 305 | tags=68%,<br>list=31%,<br>signal=95%  |
| 154 | GSE40685_TREG_VS_FOXP3_KO_T<br>REG_PRECURSOR_UP                             | 32 | 0.431 | 2.5777 | 0      | ####<br># | 0.069 | 321 | tags=72%,<br>list=33%,<br>signal=104% |
| 155 | GSE21546_ELK1_KO_VS_SAPIA_K<br>O_AND_ELK1_KO_DP_THYMOCY<br>TES_UP           | 20 | 0.517 | 2.5702 | 0.0019 | ####<br># | 0.073 | 305 | tags=80%,<br>list=31%,<br>signal=114% |
| 156 | GSE19401_NAIVE_VS_IMMUNIZED<br>_MOUSE_PLN_FOLLICULAR_DC_<br>DN              | 33 | 0.408 | 2.5696 | 0      | ####<br># | 0.073 | 271 | tags=64%,<br>list=28%,<br>signal=85%  |
| 157 | GSE22886_IGG_IGA_MEMORY_BC<br>ELL_VS_BM_PLASMA_CELL_UP                      | 22 | 0.498 | 2.5657 | 0      | ####<br># | 0.076 | 377 | tags=86%,<br>list=39%,<br>signal=138% |
| 158 | GSE34156_NOD2_LIGAND_VS_TLR<br>1_TLR2_LIGAND_6H_TREATED_M<br>ONOCYTE_UP     | 22 | 0.488 | 2.5642 | 0      | ####<br># | 0.079 | 237 | tags=68%,<br>list=24%,<br>signal=88%  |
| 159 | KAECH_NAIVE_VS_MEMORY_CD<br>8_TCELL_DN                                      | 34 | 0.412 | 2.5637 | 0      | ####<br># | 0.079 | 162 | tags=50%,<br>list=17%,<br>signal=58%  |
| 160 | GSE29618_BCELL_VS_PDC_UP                                                    | 44 | 0.368 | 2.5577 | 0      | ####<br># | 0.082 | 193 | tags=50%,<br>list=20%,<br>signal=60%  |
| 161 | GSE24634_TREG_VS_TCONV_POS<br>T_DAY3_IL4_CONVERSION_DN                      | 37 | 0.389 | 2.5492 | 0      | ####<br># | 0.09  | 272 | tags=62%,<br>list=28%,<br>signal=83%  |
| 162 | GSE21670_TGFB_VS_IL6_TREATE<br>D_STAT3_KO_CD4_TCELL_DN                      | 18 | 0.549 | 2.5483 | 0      | ####<br># | 0.092 | 233 | tags=72%,<br>list=24%,<br>signal=93%  |
| 163 | GSE46242_CTRL_VS_EGR2_DELET<br>ED_ANERGIC_TH1_CD4_TCELL_D<br>N              | 20 | 0.499 | 2.5412 | 0.0019 | ####<br># | 0.096 | 351 | tags=85%,<br>list=36%,<br>signal=130% |
| 164 | GSE19888_CTRL_VS_TCELL_MEM<br>BRANES_ACT_MAST_CELL_PRET<br>REAT_A3R_INH_DN  | 33 | 0.41  | 2.536  | 0      | ####<br># | 0.099 | 401 | tags=79%,<br>list=41%,<br>signal=129% |



|     |                                                                                 |    |       |        |        |           |       |     |                                        |
|-----|---------------------------------------------------------------------------------|----|-------|--------|--------|-----------|-------|-----|----------------------------------------|
| 165 | GSE13411_NAIVE_VS_IGM_MEMO<br>RY_BCELL_DN                                       | 26 | 0.451 | 2.5355 | 0.0019 | ####<br># | 0.099 | 321 | tags=73%,<br>list=33%,<br>signal=106%  |
| 166 | GSE43955_TH0_VS_TGFB_IL6_TH1<br>7_ACT_CD4_TCELL_1H_UP                           | 22 | 0.483 | 2.5325 | 0      | ####<br># | 0.104 | 387 | tags=86%,<br>list=40%,<br>signal=140%  |
| 167 | GSE18791_CTRL_VS_NEWCASTLE<br>_VIRUS_DC_6H_DN                                   | 28 | 0.428 | 2.5239 | 0      | ####<br># | 0.113 | 392 | tags=79%,<br>list=40%,<br>signal=128%  |
| 168 | GSE22886_DAY0_VS_DAY1_MONO<br>CYTE_IN_CULTURE_UP                                | 45 | 0.358 | 2.5231 | 0      | ####<br># | 0.113 | 556 | tags=91%,<br>list=57%,<br>signal=202%  |
| 169 | GSE43863_NAIVE_VS_MEMORY_T<br>FH_CD4_TCELL_D150_LCMV_UP                         | 27 | 0.434 | 2.5224 | 0      | ####<br># | 0.115 | 494 | tags=51%,<br>signal=183%               |
| 170 | GSE2405_0H_VS_12H_A_PHAGOC<br>YTOPHILUM_STIM_NEUTROPHIL_<br>UP                  | 36 | 0.391 | 2.5214 | 0      | ####<br># | 0.116 | 530 | tags=92%,<br>list=54%,<br>signal=194%  |
| 171 | GSE2405_S_AUREUS_VS_A_PHAG<br>OCYTOPHILUM_NEUTROPHIL_UP                         | 23 | 0.481 | 2.5193 | 0      | ####<br># | 0.119 | 403 | tags=87%,<br>list=41%,<br>signal=145%  |
| 172 | GSE16755_CTRL_VS_IFNA_TREAT<br>ED_MAC_DN                                        | 28 | 0.437 | 2.5171 | 0      | ####<br># | 0.122 | 411 | tags=82%,<br>list=42%,<br>signal=138%  |
| 173 | GSE21546_UNSTIM_VS_ANTI_CD3<br>_STIM_ELK1_KO_DP_THYMOCYT<br>ES_UP               | 23 | 0.483 | 2.513  | 0      | 0.001     | 0.129 | 321 | tags=78%,<br>list=33%,<br>signal=114%  |
| 174 | GSE25123_IL4_VS_IL4_AND_ROSI<br>GLITAZONE_STIM_PPARG_KO_M<br>ACROPHAGE_DAY10_DN | 23 | 0.475 | 2.5113 | 0      | 0.001     | 0.13  | 250 | tags=70%,<br>list=26%,<br>signal=91%   |
| 175 | GSE22935_WT_VS_MYPD88_KO_MA<br>CROPHAGE_UP                                      | 36 | 0.388 | 2.5067 | 0      | 0.001     | 0.14  | 370 | tags=72%,<br>list=38%,<br>signal=112%  |
| 176 | GSE28408_LY6G_POS_VS_NEG_DC<br>_UP                                              | 16 | 0.552 | 2.5045 | 0      | 0.001     | 0.143 | 444 | tags=100%,<br>list=46%,<br>signal=181% |
| 177 | GSE22886_NAIVE_BCELL_VS_NEU<br>TROPHIL_UP                                       | 32 | 0.412 | 2.5016 | 0      | 0.001     | 0.151 | 153 | tags=50%,<br>list=16%,<br>signal=57%   |
| 178 | GSE7548_DAY7_VS_DAY28_PCC_I<br>MMUNIZATION_CD4_TCELL_DN                         | 31 | 0.415 | 2.4998 | 0      | 0.001     | 0.156 | 271 | tags=65%,<br>list=28%,<br>signal=87%   |
| 179 | GSE16450_CTRL_VS_IFNA_6H_STI<br>M_IMMATURE_NEURON_CELL_LI<br>NE_DN              | 21 | 0.492 | 2.4963 | 0      | 0.001     | 0.161 | 295 | tags=76%,<br>list=30%,<br>signal=107%  |
| 180 | GSE42088_UNINF_VS_LEISHMANI<br>A_INF_DC_4H_DN                                   | 20 | 0.496 | 2.4949 | 0      | 0.001     | 0.164 | 337 | tags=80%,<br>list=35%,<br>signal=120%  |
| 181 | GSE24142_EARLY_THYMIC_PROG<br>ENITOR_VS_DN2_THYMOCYTE_U<br>P                    | 36 | 0.393 | 2.4853 | 0.0017 | 0.001     | 0.181 | 578 | tags=97%,<br>list=59%,<br>signal=230%  |
| 182 | GSE3400_UNTREATED_VS_IFNB_T<br>REATED_MEF_DN                                    | 18 | 0.516 | 2.4814 | 0      | 0.001     | 0.186 | 257 | tags=72%,<br>list=26%,<br>signal=96%   |
| 183 | GSE9960_GRAM_NEG_VS_GRAM_<br>NEG_AND_POS_SEPSIS_PBMIC_UP                        | 19 | 0.507 | 2.4789 | 0      | 0.001     | 0.188 | 489 | tags=100%,<br>list=50%,<br>signal=197% |
| 184 | GSE10325_BCELL_VS_MYELOID_<br>UP                                                | 39 | 0.368 | 2.4764 | 0      | 0.001     | 0.19  | 418 | tags=77%,<br>list=43%,<br>signal=129%  |

|     |                                                                           |    |       |        |        |       |       |     |                                        |
|-----|---------------------------------------------------------------------------|----|-------|--------|--------|-------|-------|-----|----------------------------------------|
| 185 | GSE22886_NAIVE_CD4_TCELL_VS_MONOCYTE_UP                                   | 42 | 0.365 | 2.4751 | 0      | 0.001 | 0.193 | 533 | tags=90%,<br>list=55%,<br>signal=191%  |
| 186 | GSE18281_SUBCAPSULAR_VS_CENTRAL_CORTICAL_REGION_OF_THYMUS_DN              | 35 | 0.392 | 2.4746 | 0.0019 | 0.001 | 0.193 | 380 | tags=74%,<br>list=39%,<br>signal=117%  |
| 187 | GSE24634_TEFF_VS_TCONV_DAY7_IN_CULTURE_DN                                 | 35 | 0.392 | 2.4687 | 0      | 0.001 | 0.202 | 310 | tags=66%,<br>list=32%,<br>signal=93%   |
| 188 | GSE22886_DC_VS_MONOCYTE_DN                                                | 40 | 0.374 | 2.4614 | 0      | 0.002 | 0.213 | 361 | tags=73%,<br>list=37%,<br>signal=110%  |
| 189 | GSE16385_ROSIGLITAZONE_IL4_VS_IL4_ALONE_STIM_MACROPHAGE_12H_UP            | 24 | 0.454 | 2.4603 | 0      | 0.002 | 0.217 | 161 | tags=54%,<br>list=17%,<br>signal=63%   |
| 190 | GSE3565_DUSP1_VS_WT_SPLENCYTES_UP                                         | 27 | 0.431 | 2.4589 | 0      | 0.002 | 0.22  | 162 | tags=52%,<br>list=17%,<br>signal=60%   |
| 191 | GSE1448_CTRL_VS_ANTI_VBETA5_DP_THYMOCYTE_DN                               | 27 | 0.441 | 2.4579 | 0      | 0.002 | 0.221 | 234 | tags=63%,<br>list=24%,<br>signal=81%   |
| 192 | GSE7831_UNSTIM_VS_INFLUENZA_STIM_PDC_4H_UP                                | 27 | 0.424 | 2.4547 | 0      | 0.002 | 0.226 | 159 | tags=52%,<br>list=16%,<br>signal=60%   |
| 193 | GSE2770_IL12_AND_TGFB_ACT_VS_ACT_CD4_TCELL_6H_UP                          | 25 | 0.446 | 2.4541 | 0      | 0.002 | 0.227 | 516 | tags=96%,<br>list=53%,<br>signal=199%  |
| 194 | GSE23568_ID3_TRANSDUCED_VS_ID3_KO_CD8_TCELL_DN                            | 17 | 0.531 | 2.4531 | 0      | 0.002 | 0.227 | 465 | tags=100%,<br>list=48%,<br>signal=188% |
| 195 | GSE29618_BCELL_VS_MDC_UP                                                  | 36 | 0.38  | 2.4527 | 0      | 0.002 | 0.229 | 495 | tags=89%,<br>list=51%,<br>signal=174%  |
| 196 | GSE29618_BCELL_VS_MONOCYTE_UP                                             | 38 | 0.374 | 2.4517 | 0      | 0.002 | 0.229 | 473 | tags=84%,<br>list=49%,<br>signal=157%  |
| 197 | GSE34205_RSV_VS_FLU_INF_INFANT_PBMC_DN                                    | 36 | 0.381 | 2.4515 | 0.0018 | 0.002 | 0.23  | 371 | tags=72%,<br>list=38%,<br>signal=112%  |
| 198 | GSE10240_IL22_VS_IL22_AND_IL17_STIM_PRIMARY_BRONCHIAL_EPITHELIAL_CELLS_DN | 17 | 0.533 | 2.4478 | 0      | 0.002 | 0.243 | 312 | tags=82%,<br>list=32%,<br>signal=119%  |
| 199 | GSE18791_CTRL_VS_NEWCASTLE_VIRUS_DC_4H_DN                                 | 21 | 0.483 | 2.4463 | 0      | 0.002 | 0.246 | 392 | tags=86%,<br>list=40%,<br>signal=140%  |
| 200 | GSE5099_DAY3_VS_DAY7_MCSF_TREATED_MACROPHAGE_UP                           | 20 | 0.489 | 2.4439 | 0      | 0.002 | 0.25  | 407 | tags=95%,<br>list=42%,<br>signal=160%  |
| 201 | GSE20715_0H_VS_48H_OZONE_TLR4_KO_LUNG_UP                                  | 32 | 0.401 | 2.4433 | 0      | 0.002 | 0.25  | 496 | tags=91%,<br>list=51%,<br>signal=179%  |
| 202 | GSE43863_NAIVE_VS_MEMORY_LY6C_INT_CXCR5POS_CD4_TCELL_D150_LCMV_UP         | 22 | 0.469 | 2.4431 | 0      | 0.002 | 0.25  | 251 | tags=68%,<br>list=26%,<br>signal=90%   |
| 203 | GSE24634_NAIVE_CD4_TCELL_VS_DAY5_IL4_CONV_TREG_UP                         | 21 | 0.474 | 2.4294 | 0      | 0.002 | 0.274 | 437 | tags=90%,<br>list=45%,<br>signal=161%  |
| 204 | GSE32986_CURDLAN_LOWDOSE_VS_CURDLAN_HIGHDOSE_STIM_DC_DN                   | 21 | 0.468 | 2.428  | 0      | 0.002 | 0.279 | 237 | tags=67%,<br>list=24%,<br>signal=86%   |

|     |                                                                                 |    |       |        |        |       |       |     |                                        |
|-----|---------------------------------------------------------------------------------|----|-------|--------|--------|-------|-------|-----|----------------------------------------|
| 205 | GSE37533_PPARG1_FOXP3_VS_FOXP3_TRANSDUCED_CD4_TCELL_P<br>IOGLITAZONE_TREATED_UP | 32 | 0.403 | 2.4227 | 0      | 0.002 | 0.289 | 392 | tags=78%,<br>list=40%,<br>signal=126%  |
| 206 | GSE24142_EARLY_THYMIC_PROG<br>ENITOR_VS_DN2_THYMOCYTE_A<br>DULT_UP              | 23 | 0.455 | 2.4217 | 0      | 0.002 | 0.293 | 397 | tags=83%,<br>list=41%,<br>signal=136%  |
| 207 | GSE21380_NON_TFH_VS_TFH_CD4<br>_TCELL_UP                                        | 22 | 0.468 | 2.4208 | 0      | 0.002 | 0.296 | 286 | tags=73%,<br>list=29%,<br>signal=101%  |
| 208 | GSE42021_CD24INT_VS_CD24LOW<br>_TREG_THYMUS_DN                                  | 31 | 0.406 | 2.4203 | 0      | 0.002 | 0.297 | 392 | tags=77%,<br>list=40%,<br>signal=125%  |
| 209 | GSE3039_ALPHAALPHA_VS_ALPH<br>ABETA_CD8_TCELL_DN                                | 25 | 0.433 | 2.4194 | 0      | 0.002 | 0.302 | 496 | tags=92%,<br>list=51%,<br>signal=183%  |
| 210 | GSE7548_NAIVE_VS_DAY7_PCC_I<br>MMUNIZATION_CD4_TCELL_DN                         | 34 | 0.389 | 2.4145 | 0      | 0.002 | 0.314 | 237 | tags=56%,<br>list=24%,<br>signal=71%   |
| 211 | GSE21379_WT_VS_SAP_KO_TFH_C<br>D4_TCELL_DN                                      | 24 | 0.453 | 2.4134 | 0      | 0.002 | 0.316 | 148 | tags=54%,<br>list=15%,<br>signal=62%   |
| 212 | GSE33424_CD161_HIGH_VS_NEG_<br>CD8_TCELL_UP                                     | 25 | 0.432 | 2.4116 | 0      | 0.002 | 0.319 | 453 | tags=88%,<br>list=47%,<br>signal=160%  |
| 213 | GSE29618_BCELL_VS_MDC_DAY7<br>_FLU_VACCINE_UP                                   | 42 | 0.351 | 2.4116 | 0.0018 | 0.002 | 0.319 | 473 | tags=81%,<br>list=49%,<br>signal=151%  |
| 214 | GSE4748_LPS_VS_LPS_AND_CYAN<br>OBACTERIUM_LPSLIKE_STIM_DC<br>_3H_UP             | 25 | 0.432 | 2.4048 | 0      | 0.002 | 0.331 | 563 | tags=100%,<br>list=58%,<br>signal=231% |
| 215 | KAECH_NAIVE_VS_DAY15_EFF_C<br>D8_TCELL_DN                                       | 35 | 0.381 | 2.4006 | 0.0018 | 0.002 | 0.344 | 256 | tags=57%,<br>list=26%,<br>signal=75%   |
| 216 | GSE26495_NAIVE_VS_PD1LOW_C<br>D8_TCELL_DN                                       | 33 | 0.386 | 2.3949 | 0      | 0.003 | 0.353 | 254 | tags=58%,<br>list=26%,<br>signal=75%   |
| 217 | GSE25088_WT_VS_STAT6_KO_MA<br>CROPHAGE_IL4_STIM_UP                              | 24 | 0.44  | 2.3947 | 0      | 0.003 | 0.354 | 475 | tags=92%,<br>list=49%,<br>signal=175%  |
| 218 | GSE19888_ADENOSINE_A3R_INH<br>_VS_TCELL_MEMBRANES_ACT_M<br>AST_CELL_UP          | 29 | 0.407 | 2.394  | 0.0035 | 0.003 | 0.354 | 392 | tags=76%,<br>list=40%,<br>signal=123%  |
| 219 | GSE2706_UNSTIM_VS_2H_LPS_AN<br>D_R848_DC_DN                                     | 28 | 0.418 | 2.3896 | 0      | 0.003 | 0.364 | 397 | tags=79%,<br>list=41%,<br>signal=129%  |
| 220 | GSE360_L_DONOVANI_VS_B_MAL<br>AYI_LOW_DOSE_DC_DN                                | 25 | 0.443 | 2.3892 | 0      | 0.003 | 0.365 | 271 | tags=68%,<br>list=28%,<br>signal=92%   |
| 221 | GSE37605_FOXP3_FUSION_GFP_V<br>S_IRES_GFP_TREG_C57BL6_DN                        | 20 | 0.482 | 2.3892 | 0      | 0.003 | 0.365 | 340 | tags=80%,<br>list=35%,<br>signal=120%  |
| 222 | GSE26030_TH1_VS_TH17_DAY5_P<br>OST_POLARIZATION_UP                              | 28 | 0.412 | 2.389  | 0      | 0.003 | 0.365 | 392 | tags=79%,<br>list=40%,<br>signal=128%  |
| 223 | GSE36826_WT_VS_IL1R_KO_SKIN_<br>STAPH_AUREUS_INF_DN                             | 31 | 0.394 | 2.3878 | 0      | 0.003 | 0.371 | 425 | tags=81%,<br>list=44%,<br>signal=139%  |
| 224 | GSE42724_NAIVE_BCELL_VS_PLA<br>SMABLAST_UP                                      | 37 | 0.363 | 2.3841 | 0      | 0.003 | 0.382 | 280 | tags=59%,<br>list=29%,<br>signal=80%   |

|     |                                                                      |    |       |        |        |       |       |     |                                        |
|-----|----------------------------------------------------------------------|----|-------|--------|--------|-------|-------|-----|----------------------------------------|
| 225 | GSE43863_DAY6_EFF_VS_DAY150<br>_MEM_TH1_CD4_TCELL_DN                 | 17 | 0.519 | 2.3825 | 0      | 0.003 | 0.388 | 425 | tags=94%,<br>list=44%,<br>signal=164%  |
| 226 | GSE26495_NAIVE_VS_PD1HIGH_C<br>D8_TCELL_DN                           | 34 | 0.381 | 2.3813 | 0      | 0.003 | 0.392 | 264 | tags=59%,<br>list=27%,<br>signal=78%   |
| 227 | GSE4984_UNTREATED_VS_GALEC<br>TIN1_TREATED_DC_DN                     | 26 | 0.431 | 2.3812 | 0      | 0.003 | 0.392 | 247 | tags=62%,<br>list=25%,<br>signal=80%   |
| 228 | GSE17974_IL4_AND_ANTI_IL12_VS<br>_UNTREATED_24H_ACT_CD4_TCE<br>LL_DN | 18 | 0.509 | 2.3808 | 0      | 0.003 | 0.392 | 396 | tags=89%,<br>list=41%,<br>signal=147%  |
| 229 | GSE45739_UNSTIM_VS_ACD3_AC<br>D28_STIM_NRAS_KO_CD4_TCELL<br>_DN      | 48 | 0.331 | 2.3799 | 0      | 0.003 | 0.395 | 530 | tags=85%,<br>list=54%,<br>signal=178%  |
| 230 | GSE6269_FLU_VS_STREP_PNEUM<br>O_INF_PBMC_UP                          | 31 | 0.387 | 2.3784 | 0      | 0.003 | 0.397 | 305 | tags=65%,<br>list=31%,<br>signal=91%   |
| 231 | GSE3982_NKCELL_VS_TH2_UP                                             | 19 | 0.488 | 2.3775 | 0      | 0.003 | 0.398 | 466 | tags=95%,<br>list=48%,<br>signal=178%  |
| 232 | GSE2706_R848_VS_R848_AND_LPS<br>_2H_STIM_DC_DN                       | 21 | 0.474 | 2.3773 | 0      | 0.003 | 0.398 | 254 | tags=67%,<br>list=26%,<br>signal=88%   |
| 233 | GSE19923_HEB_KO_VS_HEB_AND<br>_E2A_KO_DP_THYMOCYTE_DN                | 27 | 0.422 | 2.3771 | 0      | 0.003 | 0.4   | 425 | tags=85%,<br>list=44%,<br>signal=147%  |
| 234 | GSE21360_NAIVE_VS_PRIMARY_<br>MEMORY_CD8_TCELL_UP                    | 28 | 0.409 | 2.3758 | 0      | 0.003 | 0.405 | 316 | tags=71%,<br>list=32%,<br>signal=103%  |
| 235 | GSE3982_BCELL_VS_CENT_MEMO<br>RY_CD4_TCELL_UP                        | 35 | 0.375 | 2.3694 | 0      | 0.003 | 0.422 | 170 | tags=49%,<br>list=17%,<br>signal=57%   |
| 236 | GSE360_DC_VS_MAC_T_GONDII_<br>UP                                     | 24 | 0.438 | 2.3641 | 0      | 0.003 | 0.44  | 208 | tags=58%,<br>list=21%,<br>signal=72%   |
| 237 | GSE28726_NAIVE_VS_ACTIVATED<br>_NKTCCELL_UP                          | 18 | 0.498 | 2.364  | 0      | 0.003 | 0.441 | 432 | tags=94%,<br>list=44%,<br>signal=167%  |
| 238 | GSE45365_HEALTHY_VS_MCMV_I<br>NFECTION_CD8A_DC_IFNAR_KO_<br>DN       | 28 | 0.406 | 2.3638 | 0      | 0.003 | 0.443 | 401 | tags=79%,<br>list=41%,<br>signal=130%  |
| 239 | GSE5099_CLASSICAL_M1_VS_ALT<br>ERNATIVE_M2_MACROPHAGE_U<br>P         | 16 | 0.521 | 2.3635 | 0      | 0.003 | 0.443 | 474 | tags=100%,<br>list=49%,<br>signal=192% |
| 240 | GSE10325_LUPUS_BCELL_VS_LUP<br>US_MYELOID_DN                         | 32 | 0.387 | 2.3629 | 0.0018 | 0.003 | 0.445 | 426 | tags=81%,<br>list=44%,<br>signal=140%  |
| 241 | GSE10325_MYELOID_VS_LUPUS_<br>MYELOID_DN                             | 31 | 0.391 | 2.3598 | 0      | 0.003 | 0.451 | 181 | tags=52%,<br>list=19%,<br>signal=61%   |
| 242 | GSE29618_BCELL_VS_MDC_DN                                             | 33 | 0.379 | 2.3512 | 0.0038 | 0.003 | 0.464 | 441 | tags=82%,<br>list=45%,<br>signal=144%  |
| 243 | GSE40666_NAIVE_VS_EFFECTOR_<br>CD8_TCELL_WITH_IFNA_STIM_90<br>MIN_UP | 24 | 0.43  | 2.3506 | 0      | 0.003 | 0.467 | 384 | tags=79%,<br>list=39%,<br>signal=127%  |
| 244 | GSE9988_ANTI_TREM1_AND_LPS_<br>VS_VEHICLE_TREATED_MONOCY<br>TES_DN   | 21 | 0.471 | 2.3473 | 0      | 0.003 | 0.474 | 323 | tags=76%,<br>list=33%,<br>signal=112%  |

|     |                                                                                   |    |       |        |        |       |       |     |                                        |
|-----|-----------------------------------------------------------------------------------|----|-------|--------|--------|-------|-------|-----|----------------------------------------|
| 245 | GSE13522_CTRL_VS_T_CRUZI_BR<br>AZIL_STRAIN_INF_SKIN_DN                            | 16 | 0.523 | 2.346  | 0.0019 | 0.003 | 0.477 | 403 | tags=94%,<br>list=41%,<br>signal=157%  |
| 246 | GSE19512_NAUTRAL_VS_INDUCE<br>D_TREG_DN                                           | 19 | 0.489 | 2.3429 | 0.0019 | 0.003 | 0.482 | 315 | tags=79%,<br>list=32%,<br>signal=114%  |
| 247 | GSE26343_UNSTIM_VS_LPS_STIM_<br>NFAT5_KO_MACRÖPHAGE_DN                            | 25 | 0.427 | 2.3364 | 0      | 0.004 | 0.502 | 428 | tags=84%,<br>list=44%,<br>signal=146%  |
| 248 | GSE42021_CD24HI_VS_CD24LOW_<br>TREG_THYMUS_DN                                     | 28 | 0.404 | 2.3359 | 0      | 0.004 | 0.503 | 321 | tags=68%,<br>list=33%,<br>signal=98%   |
| 249 | GSE36476_CTRL_VS_TSST_ACT_40<br>H_MEMORY_CD4_TCELL_YOUNG<br>UP                    | 23 | 0.435 | 2.3278 | 0      | 0.004 | 0.526 | 260 | tags=65%,<br>list=27%,<br>signal=87%   |
| 250 | GSE22589_HEALTHY_VS_SIV_INF<br>ECTED_DC_DN                                        | 24 | 0.429 | 2.3275 | 0      | 0.004 | 0.528 | 215 | tags=58%,<br>list=22%,<br>signal=73%   |
| 251 | GSE1925_CTRL_VS_24H_IFNG_STI<br>M_MACRÖPHAGE_UP                                   | 22 | 0.436 | 2.3203 | 0      | 0.004 | 0.548 | 364 | tags=77%,<br>list=37%,<br>signal=121%  |
| 252 | GSE18791_CTRL_VS_NEWCASTLE<br>_VIRUS_DC_10H_DN                                    | 20 | 0.471 | 2.3195 | 0.0019 | 0.004 | 0.548 | 486 | tags=95%,<br>list=50%,<br>signal=186%  |
| 253 | GSE21360_SECONDARY_VS_QUAT<br>ERNARY_MEMORY_CD8_TCELL_<br>UP                      | 19 | 0.469 | 2.3171 | 0      | 0.004 | 0.557 | 254 | tags=68%,<br>list=26%,<br>signal=91%   |
| 254 | GSE12845_IGD_POS_BLOOD_VS_N<br>AIVE_TONSIL_BCELL_UP                               | 22 | 0.446 | 2.313  | 0      | 0.004 | 0.572 | 277 | tags=68%,<br>list=28%,<br>signal=93%   |
| 255 | GSE22886_NAIVE_TCELL_VS_NKC<br>ELL_UP                                             | 29 | 0.397 | 2.3127 | 0      | 0.004 | 0.572 | 533 | tags=93%,<br>list=55%,<br>signal=200%  |
| 256 | GSE9650_NAIVE_VS_MEMORY_C<br>D8_TCELL_DN                                          | 35 | 0.367 | 2.3098 | 0      | 0.004 | 0.581 | 162 | tags=46%,<br>list=17%,<br>signal=53%   |
| 257 | GSE42088_UNINF_VS_LEISHMANI<br>A_INF_DC_24H_UP                                    | 30 | 0.396 | 2.3062 | 0      | 0.005 | 0.589 | 362 | tags=73%,<br>list=37%,<br>signal=113%  |
| 258 | GSE18281_PERIMEDULLARY_COR<br>TICAL_REGION_VS_WHOLE_COR<br>TEX_THYMUS_DN          | 15 | 0.529 | 2.3062 | 0      | 0.004 | 0.589 | 236 | tags=73%,<br>list=24%,<br>signal=95%   |
| 259 | GSE16522_MEMORY_VS_NAIVE_A<br>NTI_CD3CD28_STIM_CD8_TCELL_<br>DN                   | 29 | 0.401 | 2.3019 | 0      | 0.005 | 0.601 | 442 | tags=83%,<br>list=45%,<br>signal=147%  |
| 260 | GSE21360_TERTIARY_VS_QUATE<br>RNARY_MEMORY_CD8_TCELL_D<br>N                       | 25 | 0.425 | 2.3015 | 0      | 0.005 | 0.601 | 284 | tags=68%,<br>list=29%,<br>signal=94%   |
| 261 | GSE38681_WT_VS_LYL1_KO_LYM<br>PHOID_PRIMED_MULTIPOTENT_P<br>ROGENITOR_DN          | 28 | 0.405 | 2.2973 | 0      | 0.005 | 0.618 | 447 | tags=86%,<br>list=46%,<br>signal=154%  |
| 262 | GSE46606_UNSTIM_VS_CD40L_IL2<br>_IL5_1DAY_STIMULATED_IRF4HI<br>GH_SORTED_BCELL_DN | 21 | 0.456 | 2.2972 | 0      | 0.005 | 0.618 | 148 | tags=52%,<br>list=15%,<br>signal=60%   |
| 263 | GSE46606_IRF4_KO_VS_WT_UNST<br>IM_BCELL_DN                                        | 20 | 0.463 | 2.2971 | 0      | 0.005 | 0.619 | 531 | tags=100%,<br>list=55%,<br>signal=215% |
| 264 | GSE10325_BCELL_VS_MYELOID_<br>DN                                                  | 42 | 0.338 | 2.2965 | 0      | 0.005 | 0.619 | 426 | tags=76%,<br>list=44%,<br>signal=130%  |

|     |                                                                        |    |       |        |        |       |       |     |                                  |
|-----|------------------------------------------------------------------------|----|-------|--------|--------|-------|-------|-----|----------------------------------|
| 265 | GSE40274_CTRL_VS_FOXP3_AND_LEF1_TRANSDUCED_ACTIVATED_CD4_TCELL_UP      | 25 | 0.421 | 2.295  | 0      | 0.005 | 0.622 | 425 | tags=84%, list=44%, signal=145%  |
| 266 | GSE18791_CTRL_VS_NEWCASTLE_VIRUS_DC_16H_DN                             | 24 | 0.425 | 2.2934 | 0.0018 | 0.005 | 0.624 | 463 | tags=88%, list=48%, signal=163%  |
| 267 | GSE17974_0H_VS_48H_IN_VITRO_ACT_CD4_TCELL_UP                           | 17 | 0.496 | 2.2921 | 0      | 0.005 | 0.628 | 247 | tags=71%, list=25%, signal=93%   |
| 268 | GSE7509_DC_VS_MONOCYTE_WITH_FCGRIIB_STIM_DN                            | 29 | 0.39  | 2.292  | 0      | 0.005 | 0.629 | 364 | tags=72%, list=37%, signal=112%  |
| 269 | GSE9650_NAIVE_VS_EFF_CD8_TCELL_DN                                      | 38 | 0.345 | 2.2895 | 0      | 0.005 | 0.636 | 162 | tags=45%, list=17%, signal=52%   |
| 270 | GSE3982_MEMORY_CD4_TCELL_VS_TH2_UP                                     | 20 | 0.459 | 2.2869 | 0.0036 | 0.005 | 0.646 | 247 | tags=65%, list=25%, signal=85%   |
| 271 | GSE17721_PAM3CSK4_VS_CPG_4H_BMDC_DN                                    | 17 | 0.49  | 2.2865 | 0      | 0.005 | 0.651 | 242 | tags=71%, list=25%, signal=92%   |
| 272 | GSE39382_IL3_VS_IL3_IL33_TREATED_MAST_CELL_DN                          | 19 | 0.467 | 2.2864 | 0.0019 | 0.005 | 0.651 | 486 | tags=95%, list=50%, signal=185%  |
| 273 | GSE41176_UNSTIM_VS_ANTI_IGM_STIM_TAK1_KO_BCELL_24H_DN                  | 23 | 0.423 | 2.2851 | 0.0019 | 0.005 | 0.655 | 301 | tags=70%, list=31%, signal=98%   |
| 274 | GSE19923_E2A_KO_VS_HEB_AND_E2A_KO_DP_THYMOCYTE_DN                      | 17 | 0.503 | 2.2825 | 0      | 0.005 | 0.66  | 342 | tags=82%, list=35%, signal=125%  |
| 275 | GSE40274_FOXP3_VS_FOXP3_AND_IRF4_TRANSDUCED_ACTIVATED_CD4_TCELL_DN     | 16 | 0.504 | 2.2804 | 0      | 0.005 | 0.667 | 122 | tags=56%, list=13%, signal=63%   |
| 276 | GSE17974_CTRL_VS_ACT_IL4_AND_ANTI_IL12_72H_CD4_TCELL_UP                | 17 | 0.485 | 2.279  | 0      | 0.005 | 0.672 | 248 | tags=71%, list=25%, signal=93%   |
| 277 | GSE360_CTRL_VS_M_TUBERCULOSIS_DC_DN                                    | 30 | 0.382 | 2.277  | 0      | 0.005 | 0.677 | 370 | tags=73%, list=38%, signal=115%  |
| 278 | GSE24634_TEFF_VS_TCONV_DAY5_IN_CULTURE_DN                              | 19 | 0.472 | 2.2744 | 0      | 0.005 | 0.683 | 435 | tags=89%, list=45%, signal=159%  |
| 279 | GSE26156_DOUBLE_POSITIVE_VS_CD4_SINGLE_POSITIVE_THYMOCYTE_UP           | 19 | 0.475 | 2.274  | 0.0019 | 0.005 | 0.684 | 420 | tags=89%, list=43%, signal=154%  |
| 280 | GSE2706_UNSTIM_VS_2H_LPS_DC_DN                                         | 27 | 0.407 | 2.2739 | 0.0018 | 0.005 | 0.684 | 237 | tags=59%, list=24%, signal=76%   |
| 281 | GSE7219_UNSTIM_VS_LPS_AND_ANTI_CD40_STIM_NIK_NFKB2_KO_DC_DN            | 28 | 0.387 | 2.2719 | 0      | 0.005 | 0.69  | 526 | tags=93%, list=54%, signal=196%  |
| 282 | GSE4748_CTRL_VS_CYANOBACTERIUM_LPSTLIKE_STIM_DC_3H_DN                  | 17 | 0.484 | 2.2712 | 0      | 0.005 | 0.693 | 133 | tags=53%, list=14%, signal=60%   |
| 283 | GSE2935_UV_INACTIVATED_VS_LIVE_SENDAI_VIRUS_INF_MACROPHAGE_DN          | 31 | 0.373 | 2.2688 | 0      | 0.005 | 0.703 | 349 | tags=68%, list=36%, signal=102%  |
| 284 | GSE16385_UNTREATED_VS_12H_ROSIGLITAZONE_IFNG_TNF_TREATED_MACROPHAGE_UP | 21 | 0.453 | 2.2668 | 0      | 0.006 | 0.707 | 541 | tags=100%, list=56%, signal=220% |

|     |                                                                                                       |    |       |        |        |       |       |     |                                        |
|-----|-------------------------------------------------------------------------------------------------------|----|-------|--------|--------|-------|-------|-----|----------------------------------------|
| 285 | GSE43863_TFH_VS_LY6C_LOW_C<br>XCR5NEG_EFFECTOR_CD4_TCELL<br>_UP                                       | 23 | 0.423 | 2.2608 | 0      | 0.006 | 0.719 | 428 | tags=83%,<br>list=44%,<br>signal=144%  |
| 286 | GSE22886_NAIVE_CD8_TCELL_VS<br>_DC_UP                                                                 | 40 | 0.34  | 2.2577 | 0      | 0.006 | 0.729 | 517 | tags=88%,<br>list=53%,<br>signal=179%  |
| 287 | GSE23568_ID3_KO_VS_WT_CD8_T<br>CELL_DN                                                                | 37 | 0.348 | 2.2568 | 0      | 0.006 | 0.729 | 281 | tags=59%,<br>list=29%,<br>signal=80%   |
| 288 | GSE23568_ID3_TRANSDUCE<br>D_VS_ID3_KO_CD8_TCELL_UP                                                    | 44 | 0.319 | 2.2541 | 0.0018 | 0.006 | 0.735 | 465 | tags=77%,<br>list=48%,<br>signal=141%  |
| 289 | GSE21774_CD62L_POS_CD56_DIM<br>_VS_CD62L_NEG_CD56_DIM_NK_C<br>ELL_DN                                  | 20 | 0.46  | 2.2512 | 0.0036 | 0.006 | 0.748 | 267 | tags=70%,<br>list=27%,<br>signal=94%   |
| 290 | GSE5679_PPARG_LIGAND_ROSIGL<br>ITAZONE_VS_ROSIGLITAZONE_A<br>ND_RARA_AAGONIST_AM580_TRE<br>ATED_DC_DN | 16 | 0.5   | 2.2496 | 0.0037 | 0.006 | 0.75  | 494 | tags=100%,<br>list=51%,<br>signal=200% |
| 291 | GSE360_HIGH_DOSE_B_MALAYI<br>_VS_M_TUBERCULOSIS_DC_DN                                                 | 35 | 0.353 | 2.2448 | 0      | 0.006 | 0.761 | 383 | tags=71%,<br>list=39%,<br>signal=113%  |
| 292 | GSE32533_MIR17_KO_VS_MIR17_O<br>VEREXPRESS_ACT_CD4_TCELL_U<br>P                                       | 32 | 0.363 | 2.2447 | 0.0018 | 0.006 | 0.761 | 133 | tags=41%,<br>list=14%,<br>signal=46%   |
| 293 | GSE19198_1H_VS_6H_IL21_TREAT<br>ED_TCELL_DN                                                           | 19 | 0.454 | 2.2426 | 0.0069 | 0.006 | 0.765 | 129 | tags=53%,<br>list=13%,<br>signal=59%   |
| 294 | GSE16450_IMMATURE_VS_MATU<br>RE_NEURON_CELL_LINE_12H_IFN<br>A_STIM_UP                                 | 19 | 0.475 | 2.2361 | 0      | 0.007 | 0.781 | 477 | tags=95%,<br>list=49%,<br>signal=182%  |
| 295 | GSE21360_NAIVE_VS_QUATERNA<br>RY_MEMORY_CD8_TCELL_DN                                                  | 29 | 0.385 | 2.2355 | 0      | 0.007 | 0.783 | 396 | tags=76%,<br>list=41%,<br>signal=124%  |
| 296 | GSE1460_INTRATHYMIC_T_PROG<br>ENITOR_VS_NAIVE_CD4_TCELL_<br>ADULT_BLOOD_DN                            | 32 | 0.363 | 2.2324 | 0.0051 | 0.007 | 0.792 | 536 | tags=91%,<br>list=55%,<br>signal=195%  |
| 297 | GSE16451_CTRL_VS_WEST_EQUIN<br>E_ENC_VIRUS_IMMATURE_NEUR<br>ON_CELL_LINE_UP                           | 20 | 0.447 | 2.2271 | 0      | 0.007 | 0.801 | 260 | tags=65%,<br>list=27%,<br>signal=87%   |
| 298 | GSE14000_UNSTIM_VS_4H_LPS_D<br>C_DN                                                                   | 32 | 0.362 | 2.2247 | 0      | 0.007 | 0.804 | 411 | tags=75%,<br>list=42%,<br>signal=125%  |
| 299 | GSE35685_CD34POS_CD38NEG_VS<br>_CD34POS_CD10POS_BONE_MARR<br>OW_DN                                    | 23 | 0.418 | 2.2236 | 0      | 0.007 | 0.807 | 392 | tags=78%,<br>list=40%,<br>signal=128%  |
| 300 | GSE3920_IFNA_VS_IFNB_TREATE<br>D_ENDOTHELIAL_CELL_DN                                                  | 25 | 0.398 | 2.2218 | 0.0018 | 0.007 | 0.813 | 526 | tags=92%,<br>list=54%,<br>signal=195%  |
| 301 | GSE41176_WT_VS_TAK1_KO_ANTI<br>_IGM_STIM_BCELL_6H_UP                                                  | 18 | 0.47  | 2.2159 | 0      | 0.007 | 0.823 | 365 | tags=83%,<br>list=37%,<br>signal=131%  |
| 302 | GSE45365_NK_CELL_VS_CD8_TCE<br>LL_MCMV_INFECTION_DN                                                   | 27 | 0.4   | 2.2152 | 0.0019 | 0.007 | 0.823 | 286 | tags=63%,<br>list=29%,<br>signal=87%   |
| 303 | GSE9988_ANTI_TREM1_VS_CTRL_<br>TREATED_MONOCYTES_DN                                                   | 25 | 0.4   | 2.2141 | 0.0018 | 0.007 | 0.825 | 343 | tags=72%,<br>list=35%,<br>signal=108%  |
| 304 | GSE23568_CTRL_VS_ID3_TRANS<br>D_UCED_CD8_TCELL_UP                                                     | 28 | 0.398 | 2.213  | 0      | 0.007 | 0.826 | 465 | tags=86%,<br>list=48%,<br>signal=159%  |

|     |                                                                                          |    |       |        |        |       |       |     |                                  |
|-----|------------------------------------------------------------------------------------------|----|-------|--------|--------|-------|-------|-----|----------------------------------|
| 305 | GSE18791_CTRL_VS_NEWCASTLE_VIRUS_DC_12H_DN                                               | 23 | 0.421 | 2.2117 | 0      | 0.008 | 0.833 | 413 | tags=83%, list=42%, signal=140%  |
| 306 | GSE16385_IFNG_TNF_VS_IL4_STIM_MACROPHAGE_UP                                              | 20 | 0.448 | 2.2116 | 0      | 0.008 | 0.833 | 362 | tags=80%, list=37%, signal=125%  |
| 307 | GSE10325_CD4_TCELL_VS_LUPUS_CD4_TCELL_DN                                                 | 38 | 0.333 | 2.2034 | 0      | 0.008 | 0.853 | 447 | tags=76%, list=46%, signal=136%  |
| 308 | GSE27241_CTRL_VS_DIGOXIN_TREATED_CD4_TCELL_IN_TH17_POLARIZING_CONDITIONS_UP              | 17 | 0.481 | 2.2015 | 0      | 0.008 | 0.854 | 513 | tags=100%, list=53%, signal=208% |
| 309 | GSE23925_DARK_ZONE_VS_NAIVE_BCELL_DN                                                     | 23 | 0.407 | 2.1999 | 0.0019 | 0.008 | 0.858 | 353 | tags=74%, list=36%, signal=113%  |
| 310 | GSE4748_CYANOBACTERIUM_LPS_LIKE_VS_LPS_AND_CYANOBACTERIUM_LPSLIKE_STIM_DC_3H_UP          | 30 | 0.375 | 2.1993 | 0      | 0.008 | 0.861 | 309 | tags=63%, list=32%, signal=90%   |
| 311 | GSE46606_DAY1_VS_DAY3_CD40L_IL2_IL5_STIMULATED_BCELL_DN                                  | 16 | 0.481 | 2.1965 | 0      | 0.008 | 0.873 | 192 | tags=63%, list=20%, signal=77%   |
| 312 | GSE11057_NAIVE_CD4_VS_PBMC_CD4_TCELL_DN                                                  | 23 | 0.412 | 2.1933 | 0      | 0.008 | 0.88  | 272 | tags=65%, list=28%, signal=88%   |
| 313 | GSE3691_IFN_PRODUCING_KILLER_DC_VS_CONVENTIONAL_DC_SPLEEN_DN                             | 16 | 0.497 | 2.1884 | 0.0018 | 0.009 | 0.885 | 178 | tags=63%, list=18%, signal=75%   |
| 314 | GSE3337_4H_VS_16H_IFNG_IN_CD8POS_DC_DN                                                   | 33 | 0.357 | 2.1883 | 0      | 0.009 | 0.885 | 235 | tags=55%, list=24%, signal=69%   |
| 315 | GSE9988_ANTI_TREM1_AND_LPS_VS_CTRL_TREATED_MONOCYTES_DN                                  | 23 | 0.416 | 2.1882 | 0      | 0.009 | 0.885 | 343 | tags=74%, list=35%, signal=111%  |
| 316 | GSE7460_FOXP3_MUT_VS_WT_ACT_TCONV_UP                                                     | 19 | 0.445 | 2.1871 | 0      | 0.009 | 0.888 | 189 | tags=58%, list=19%, signal=70%   |
| 317 | GSE5679_PPARG_LIGAND_ROSIGLITAZONE_VS_ROSIGLITAZONE_AND_RARA_Agonist_AM580_Treated_DC_UP | 20 | 0.446 | 2.1834 | 0.0019 | 0.009 | 0.893 | 241 | tags=65%, list=25%, signal=85%   |
| 318 | GSE557_CIITA_KO_VS_I_AB_KO_DC_UP                                                         | 19 | 0.462 | 2.1817 | 0.0037 | 0.009 | 0.896 | 303 | tags=74%, list=31%, signal=105%  |
| 319 | GSE29949_CD8_NEG_DC_SPLEEN_VS_MONOCYTE_BONE_MARROW_UP                                    | 23 | 0.417 | 2.1816 | 0.0019 | 0.009 | 0.896 | 171 | tags=52%, list=18%, signal=62%   |
| 320 | GSE24634_IL4_VS_CTRL_TREATED_NAIVE_CD4_TCELL_DAY10_DN                                    | 27 | 0.375 | 2.1797 | 0      | 0.009 | 0.902 | 399 | tags=78%, list=41%, signal=128%  |
| 321 | GSE22886_NAIVE_CD4_TCELL_VS_DC_UP                                                        | 34 | 0.348 | 2.1785 | 0.0036 | 0.009 | 0.904 | 552 | tags=94%, list=57%, signal=210%  |
| 322 | GSE22140_HEALTHY_VS_ARTHROITIC_MOUSE_CD4_TCELL_UP                                        | 31 | 0.362 | 2.1753 | 0      | 0.009 | 0.912 | 307 | tags=65%, list=32%, signal=91%   |
| 323 | GSE2706_2H_VS_8H_LPS_STIM_DC_DN                                                          | 24 | 0.406 | 2.1742 | 0.0018 | 0.009 | 0.912 | 411 | tags=79%, list=42%, signal=134%  |
| 324 | GSE360_L_DONOVANI_VS_B_MALAYI_LOW_DOSE_DC_UP                                             | 19 | 0.435 | 2.172  | 0.0019 | 0.009 | 0.918 | 282 | tags=68%, list=29%, signal=94%   |



|     |                                                                    |    |       |        |        |       |       |     |                                       |
|-----|--------------------------------------------------------------------|----|-------|--------|--------|-------|-------|-----|---------------------------------------|
| 325 | GSE22886_IGM_MEMORY_BCELL_VS_BM_PLASMA_CELL_UP                     | 24 | 0.396 | 2.1719 | 0      | 0.009 | 0.918 | 377 | tags=79%,<br>list=39%,<br>signal=126% |
| 326 | GSE11057_NAIVE_VS_EFF_MEMORY_CD4_TCELL_DN                          | 32 | 0.355 | 2.1714 | 0.0036 | 0.009 | 0.918 | 274 | tags=56%,<br>list=28%,<br>signal=76%  |
| 327 | GSE3982_BCELL_VS_NKCELL_DN                                         | 23 | 0.411 | 2.1682 | 0      | 0.01  | 0.922 | 417 | tags=83%,<br>list=43%,<br>signal=141% |
| 328 | GSE43863_TH1_VS_TFH_MEMORY_CD4_TCELL_DN                            | 27 | 0.38  | 2.1674 | 0.0017 | 0.01  | 0.923 | 413 | tags=78%,<br>list=42%,<br>signal=131% |
| 329 | GSE7852_THYMUS_VS_FAT_TCONV_DN                                     | 25 | 0.388 | 2.1624 | 0      | 0.01  | 0.928 | 413 | tags=80%,<br>list=42%,<br>signal=135% |
| 330 | GSE40274_CTRL_VS_XBP1_TRANS-DUCED_ACTIVATED_CD4_TCELL_UP           | 18 | 0.465 | 2.1614 | 0      | 0.01  | 0.931 | 477 | tags=94%,<br>list=49%,<br>signal=182% |
| 331 | GSE9988_ANTI_TREM1_VS_VEHICLE_TREATED_MONOCYTES_DN                 | 27 | 0.381 | 2.1601 | 0.0037 | 0.01  | 0.932 | 351 | tags=70%,<br>list=36%,<br>signal=107% |
| 332 | GSE33425_CD161_INT_VS_NEG_CD8_TCELL_DN                             | 23 | 0.417 | 2.1591 | 0.0018 | 0.01  | 0.933 | 240 | tags=61%,<br>list=25%,<br>signal=79%  |
| 333 | GSE35825_IFNA_VS_IFNG_STIM_MACROPHAGE_UP                           | 15 | 0.488 | 2.1532 | 0.0019 | 0.011 | 0.941 | 243 | tags=67%,<br>list=25%,<br>signal=87%  |
| 334 | GSE16450_IMMATURE_VS_MATURE_NEURON_CELL_LINE_UP                    | 25 | 0.394 | 2.1527 | 0      | 0.011 | 0.941 | 459 | tags=88%,<br>list=47%,<br>signal=162% |
| 335 | GSE14000_UNSTIM_VS_16H_LPS_DC_TRANSLATED_RNA_DN                    | 24 | 0.402 | 2.1502 | 0.0018 | 0.011 | 0.944 | 254 | tags=63%,<br>list=26%,<br>signal=82%  |
| 336 | GSE20715_WT_VS_TLR4_KO_LUNG_DN                                     | 15 | 0.476 | 2.1468 | 0      | 0.011 | 0.946 | 406 | tags=87%,<br>list=42%,<br>signal=146% |
| 337 | GSE42021_CD24INT_VS_CD24LOW_TCONV_THYMUS_UP                        | 28 | 0.376 | 2.1456 | 0.0018 | 0.011 | 0.949 | 267 | tags=61%,<br>list=27%,<br>signal=81%  |
| 338 | GSE3982_MEMORY_CD4_TCELL_VS_BCELL_DN                               | 42 | 0.312 | 2.1431 | 0.0019 | 0.011 | 0.95  | 327 | tags=60%,<br>list=34%,<br>signal=86%  |
| 339 | GSE1740_UNSTIM_VS_IFNA_STIMULATED_MCSF_IFNG_DERIVED_MACROPHAGE_UP  | 23 | 0.393 | 2.1429 | 0.0037 | 0.011 | 0.95  | 401 | tags=78%,<br>list=41%,<br>signal=130% |
| 340 | GSE17186_MEMORY_VS_CD21HIGH_TRANSITIONAL_BCELL_DN                  | 33 | 0.341 | 2.1425 | 0      | 0.011 | 0.95  | 477 | tags=82%,<br>list=49%,<br>signal=155% |
| 341 | GSE360_CTRL_VS_T_GONDII_DC_DN                                      | 24 | 0.396 | 2.1421 | 0.0019 | 0.011 | 0.95  | 348 | tags=71%,<br>list=36%,<br>signal=107% |
| 342 | GSE40274_XBP1_VS_FOXP3_AND_XBP1_TRANS-DUCED_ACTIVATED_CD4_TCELL_UP | 18 | 0.448 | 2.1413 | 0.0019 | 0.011 | 0.95  | 344 | tags=78%,<br>list=35%,<br>signal=118% |
| 343 | GSE3565_CTRL_VS_LPS_INJECTED_SPLENOCYTES_UP                        | 26 | 0.387 | 2.1403 | 0.0036 | 0.011 | 0.952 | 220 | tags=54%,<br>list=23%,<br>signal=68%  |
| 344 | GSE14769_40MIN_VS_360MIN_LPS_BMDM_DN                               | 15 | 0.479 | 2.1399 | 0.0077 | 0.011 | 0.952 | 222 | tags=67%,<br>list=23%,<br>signal=85%  |

|     |                                                                                   |    |       |        |        |       |       |     |                                       |
|-----|-----------------------------------------------------------------------------------|----|-------|--------|--------|-------|-------|-----|---------------------------------------|
| 345 | GSE24142_EARLY_THYMIC_PROG<br>ENITOR_VS_DN3_THYMOCYTE_D<br>N                      | 28 | 0.371 | 2.1386 | 0.0018 | 0.011 | 0.955 | 521 | tags=89%,<br>list=53%,<br>signal=186% |
| 346 | GSE2405_HEAT_KILLED_LYSATE<br>VS_LIVE_A_PHAGOCYTOPHILUM<br>_STIM_NEUTROPHIL_9H_DN | 33 | 0.337 | 2.1384 | 0.0037 | 0.011 | 0.956 | 235 | tags=52%,<br>list=24%,<br>signal=66%  |
| 347 | GSE36078_WT_VS_IL1R_KO_LUNG<br>_DC_AFTER_AD5_INF_UP                               | 33 | 0.341 | 2.1376 | 0.0018 | 0.011 | 0.956 | 142 | tags=42%,<br>list=15%,<br>signal=48%  |
| 348 | GSE17186_NAIVE_VS_CD21LOW_T<br>RANSITIONAL_BCELL_CORD_B<br>LOOD_UP                | 17 | 0.468 | 2.1375 | 0.0019 | 0.011 | 0.956 | 419 | tags=88%,<br>list=43%,<br>signal=152% |
| 349 | GSE6092_UNSTIM_VS_IFNG_STIM<br>_ENDOTHELIAL_CELL_DN                               | 20 | 0.427 | 2.1373 | 0.0035 | 0.011 | 0.957 | 355 | tags=75%,<br>list=36%,<br>signal=116% |
| 350 | GSE29618_MONOCYTE_VS_PDC_D<br>AY7_FLU_VACCINE_UP                                  | 35 | 0.343 | 2.1369 | 0      | 0.011 | 0.957 | 426 | tags=77%,<br>list=44%,<br>signal=132% |
| 351 | GSE11057_PBMC_VS_MEM_CD4_T<br>CELL_UP                                             | 30 | 0.357 | 2.1354 | 0      | 0.011 | 0.959 | 506 | tags=87%,<br>list=52%,<br>signal=175% |
| 352 | GSE43863_DAY6_EFF_VS_DAY150<br>_MEM_TH1_CD4_TCELL_UP                              | 39 | 0.317 | 2.1347 | 0      | 0.011 | 0.961 | 390 | tags=69%,<br>list=40%,<br>signal=111% |
| 353 | GSE44649_WT_VS_MIR155_KO_NA<br>IVE_CD8_TCELL_DN                                   | 24 | 0.394 | 2.1339 | 0.0055 | 0.011 | 0.962 | 414 | tags=79%,<br>list=43%,<br>signal=134% |
| 354 | GSE29618_BCELL_VS_MDC_DAY7<br>_FLU_VACCINE_DN                                     | 38 | 0.327 | 2.133  | 0      | 0.011 | 0.963 | 441 | tags=76%,<br>list=45%,<br>signal=134% |
| 355 | GSE7852_LN_VS_FAT_TCONV_DN                                                        | 26 | 0.38  | 2.1321 | 0.0019 | 0.011 | 0.964 | 274 | tags=62%,<br>list=28%,<br>signal=83%  |
| 356 | GSE19198_1H_VS_24H_IL21_TREA<br>TED_TCELL_DN                                      | 24 | 0.4   | 2.1277 | 0.0056 | 0.012 | 0.965 | 512 | tags=92%,<br>list=53%,<br>signal=188% |
| 357 | GSE17721_PAM3CSK4_VS_CPG_12<br>H_BMDC_DN                                          | 16 | 0.459 | 2.1254 | 0.0019 | 0.012 | 0.969 | 221 | tags=63%,<br>list=23%,<br>signal=80%  |
| 358 | GSE33425_CD8_ALPHAALPHA_VS<br>_ALPHABETA_CD161_HIGH_TCEL<br>L_UP                  | 32 | 0.351 | 2.1251 | 0      | 0.012 | 0.969 | 309 | tags=63%,<br>list=32%,<br>signal=89%  |
| 359 | GSE19772_CTRL_VS_HCMV_INF_<br>MONOCYTES_UP                                        | 26 | 0.381 | 2.1234 | 0.0018 | 0.012 | 0.969 | 217 | tags=54%,<br>list=22%,<br>signal=67%  |
| 360 | GSE8835_CD4_VS_CD8_TCELL_CL<br>L_PATIENT_UP                                       | 33 | 0.343 | 2.1225 | 0.0018 | 0.012 | 0.971 | 237 | tags=52%,<br>list=24%,<br>signal=66%  |
| 361 | GSE22886_CD8_TCELL_VS_BCELL<br>_NAIVE_UP                                          | 48 | 0.291 | 2.1219 | 0      | 0.012 | 0.974 | 533 | tags=81%,<br>list=55%,<br>signal=171% |
| 362 | GSE3982_CTRL_VS_LPS_48H_DC_<br>DN                                                 | 36 | 0.329 | 2.1213 | 0.0019 | 0.012 | 0.975 | 299 | tags=58%,<br>list=31%,<br>signal=81%  |
| 363 | GSE17974_CTRL_VS_ACT_IL4_AN<br>D_ANTI_IL12_48H_CD4_TCELL_UP                       | 20 | 0.427 | 2.1202 | 0      | 0.012 | 0.975 | 179 | tags=55%,<br>list=18%,<br>signal=66%  |
| 364 | GSE35685_CD34POS_CD10NEG_CD<br>62LPOS_VS_CD34POS_CD10POS_B<br>ONE_MARROW_DN       | 29 | 0.366 | 2.1184 | 0.0018 | 0.012 | 0.976 | 272 | tags=59%,<br>list=28%,<br>signal=79%  |

|     |                                                                            |    |       |        |        |       |       |     |                                       |
|-----|----------------------------------------------------------------------------|----|-------|--------|--------|-------|-------|-----|---------------------------------------|
| 365 | GSE21360_PRIMARY_VS_QUATER<br>NARY_MEMORY_CD8_TCELL_UP                     | 31 | 0.333 | 2.1179 | 0.0037 | 0.012 | 0.976 | 254 | tags=55%,<br>list=26%,<br>signal=72%  |
| 366 | GSE14415_NATURAL_TREG_VS_F<br>OXP3_KO_NATURAL_TREG_UP                      | 20 | 0.424 | 2.1176 | 0.0018 | 0.012 | 0.976 | 474 | tags=90%,<br>list=49%,<br>signal=172% |
| 367 | GSE22886_NAIVE_TCELL_VS_MO<br>NOCYTE_UP                                    | 44 | 0.304 | 2.1163 | 0.0018 | 0.012 | 0.976 | 533 | tags=84%,<br>list=55%,<br>signal=177% |
| 368 | GSE2770_IL4_ACT_VS_ACT_CD4_T<br>CELL_6H_UP                                 | 20 | 0.431 | 2.1147 | 0.002  | 0.012 | 0.978 | 422 | tags=85%,<br>list=43%,<br>signal=147% |
| 369 | GSE26488_CTRL_VS_PEPTIDE_INJ<br>ECTION_OT2_THYMOCYTE_DN                    | 33 | 0.341 | 2.1128 | 0.0035 | 0.013 | 0.979 | 331 | tags=64%,<br>list=34%,<br>signal=93%  |
| 370 | GSE37301_MULTIPOTENT_PROGE<br>NITOR_VS_COMMON_LYMPHOID<br>_PROGENITOR_UP   | 19 | 0.432 | 2.1078 | 0.0072 | 0.013 | 0.981 | 419 | tags=84%,<br>list=43%,<br>signal=145% |
| 371 | GSE22886_NAIVE_CD8_TCELL_VS<br>_DC_DN                                      | 29 | 0.362 | 2.1076 | 0      | 0.013 | 0.981 | 268 | tags=59%,<br>list=28%,<br>signal=78%  |
| 372 | GSE24142_EARLY_THYMIC_PROG<br>ENITOR_VS_DN3_THYMOCYTE_A<br>DULT_UP         | 20 | 0.422 | 2.1072 | 0      | 0.013 | 0.982 | 400 | tags=80%,<br>list=41%,<br>signal=133% |
| 373 | GSE46606_IRF4HIGH_VS_WT_CD4<br>0L_IL2_IL5_DAY3_STIMULATED_<br>BCELL_DN     | 26 | 0.369 | 2.1061 | 0.0036 | 0.013 | 0.984 | 239 | tags=58%,<br>list=25%,<br>signal=74%  |
| 374 | GSE7460_TCONV_VS_TREG_THY<br>MUS_DN                                        | 15 | 0.489 | 2.106  | 0      | 0.013 | 0.984 | 239 | tags=67%,<br>list=25%,<br>signal=87%  |
| 375 | GSE32986_CURDLAN_HIGHDOSE_<br>VS_GMCSF_AND_CURDLAN_HIG<br>HDOSE_STIM_DC_DN | 31 | 0.344 | 2.1033 | 0.0019 | 0.013 | 0.984 | 463 | tags=81%,<br>list=48%,<br>signal=149% |
| 376 | GSE22601_CD4_SINGLE_POSITIVE<br>_VS_CD8_SINGLE_POSITIVE_THY<br>MOCYTE_DN   | 23 | 0.401 | 2.1032 | 0.0018 | 0.013 | 0.984 | 252 | tags=61%,<br>list=26%,<br>signal=80%  |
| 377 | GSE33425_CD161_HIGH_VS_INT_C<br>D8_TCELL_UP                                | 26 | 0.375 | 2.1018 | 0.0072 | 0.013 | 0.985 | 309 | tags=65%,<br>list=32%,<br>signal=93%  |
| 378 | GSE6269_HEALTHY_VS_STAPH_A<br>UREUS_INF_PBMC_UP                            | 24 | 0.396 | 2.0999 | 0.0019 | 0.013 | 0.985 | 305 | tags=67%,<br>list=31%,<br>signal=95%  |
| 379 | GSE22886_NAIVE_CD4_TCELL_VS<br>_DC_DN                                      | 25 | 0.383 | 2.0946 | 0.0039 | 0.014 | 0.985 | 197 | tags=52%,<br>list=20%,<br>signal=64%  |
| 380 | GSE45365_NK_CELL_VS_CD11B_D<br>C_DN                                        | 21 | 0.409 | 2.094  | 0      | 0.014 | 0.985 | 362 | tags=76%,<br>list=37%,<br>signal=119% |
| 381 | GSE360_T_GONDII_VS_B_MALAYI<br>_LOW_DOSE_DC_DN                             | 29 | 0.358 | 2.0923 | 0.0037 | 0.014 | 0.986 | 417 | tags=76%,<br>list=43%,<br>signal=129% |
| 382 | GSE40273_GATA1_KO_VS_WT_TR<br>EG_DN                                        | 15 | 0.474 | 2.0923 | 0.0018 | 0.014 | 0.986 | 451 | tags=93%,<br>list=46%,<br>signal=171% |
| 383 | GSE21063_CTRL_VS_ANTI_IGM_S<br>TIM_BCELL_NFATC1_KO_16H_UP                  | 21 | 0.405 | 2.0911 | 0      | 0.014 | 0.987 | 214 | tags=57%,<br>list=22%,<br>signal=72%  |
| 384 | GSE35825_UNTREATED_VS_IFNA_<br>STIM_MACROPHAGE_DN                          | 21 | 0.419 | 2.0863 | 0      | 0.014 | 0.989 | 312 | tags=71%,<br>list=32%,<br>signal=103% |

|     |                                                                             |    |       |        |        |       |       |     |                                       |
|-----|-----------------------------------------------------------------------------|----|-------|--------|--------|-------|-------|-----|---------------------------------------|
| 385 | GSE22935 WT VS MYD88 KO MA<br>CROPHAGE_48H_MBOVIS_BCG_S<br>TIM_DN           | 24 | 0.379 | 2.0862 | 0.0019 | 0.014 | 0.989 | 363 | tags=71%,<br>list=37%,<br>signal=110% |
| 386 | GSE39556 UNTREATED VS 3H P<br>OLYIC_INJ_MOUSE_CD8A_DC_DN                    | 25 | 0.381 | 2.0845 | 0.0039 | 0.014 | 0.99  | 321 | tags=68%,<br>list=33%,<br>signal=99%  |
| 387 | GSE27670 BLIMP1 VS LMP1 TRA<br>NSDUCED_GC_BCELL_UP                          | 31 | 0.348 | 2.0832 | 0.0053 | 0.015 | 0.992 | 303 | tags=61%,<br>list=31%,<br>signal=86%  |
| 388 | GSE31082_DN VS_CD8_SP_THYM<br>OCYTE_DN                                      | 22 | 0.409 | 2.083  | 0.0054 | 0.014 | 0.992 | 387 | tags=77%,<br>list=40%,<br>signal=125% |
| 389 | GSE22611_NOD2_TRANSDUCED_V<br>S_CTRL_HEK293T_STIMULATED_<br>WITH_MDP_2H_UP  | 20 | 0.428 | 2.0811 | 0.0018 | 0.015 | 0.994 | 379 | tags=80%,<br>list=39%,<br>signal=128% |
| 390 | GSE9316_IL6_KO VS_IFNG_KO_IN<br>VIVO_EXPANDED_CD4_TCELL_D<br>N              | 28 | 0.364 | 2.0811 | 0.0019 | 0.015 | 0.994 | 380 | tags=71%,<br>list=39%,<br>signal=114% |
| 391 | GSE21927_SPLEEN_C57BL6 VS_4T<br>1_TUMOR_BALBC_MONOCYTES_<br>DN              | 27 | 0.371 | 2.0806 | 0.0017 | 0.015 | 0.994 | 392 | tags=74%,<br>list=40%,<br>signal=121% |
| 392 | GSE360_T_GONDII VS_M_TUBER<br>CULOSIS_MAC_DN                                | 19 | 0.426 | 2.0803 | 0.0037 | 0.015 | 0.994 | 221 | tags=58%,<br>list=23%,<br>signal=73%  |
| 393 | GSE19772_HCMV_INFL VS_HCMV<br>_INF_MONOCYTES_AND_PI3K_IN<br>HIBITION_DN     | 23 | 0.395 | 2.0796 | 0.0038 | 0.015 | 0.994 | 217 | tags=57%,<br>list=22%,<br>signal=71%  |
| 394 | GSE29618_BCELL VS_PDC_DAY7_<br>FLU_VACCINE_UP                               | 44 | 0.302 | 2.0755 | 0.0018 | 0.015 | 0.994 | 193 | tags=43%,<br>list=20%,<br>signal=51%  |
| 395 | GSE40274_FOXP3 VS_FOXP3_AND<br>_PBX1_TRANSDUCED_ACTIVAT<br>E_D_CD4_TCELL_UP | 20 | 0.421 | 2.0753 | 0.0019 | 0.015 | 0.994 | 351 | tags=75%,<br>list=36%,<br>signal=115% |
| 396 | GSE19198_CTRL VS_IL21_TREATE<br>D_TCELL_6H_UP                               | 31 | 0.343 | 2.0723 | 0.0071 | 0.015 | 0.995 | 406 | tags=74%,<br>list=42%,<br>signal=123% |
| 397 | GSE2405_0H VS_1.5H_A_PHAGOC<br>YTOPHILUM_STIM_NEUTROPHIL_<br>UP             | 19 | 0.426 | 2.0711 | 0.0057 | 0.015 | 0.995 | 275 | tags=68%,<br>list=28%,<br>signal=93%  |
| 398 | GSE43863_TH1 VS_TFH_EFFECTO<br>R_CD4_TCELL_DN                               | 16 | 0.465 | 2.0702 | 0.0018 | 0.015 | 0.995 | 367 | tags=81%,<br>list=38%,<br>signal=128% |
| 399 | GSE30083_SP3 VS_SP4_THYMOCY<br>TE_DN                                        | 28 | 0.355 | 2.0697 | 0.0055 | 0.015 | 0.995 | 251 | tags=57%,<br>list=26%,<br>signal=75%  |
| 400 | GSE3337_CTRL VS_4H_IFNG_IN_C<br>D8POS_DC_DN                                 | 29 | 0.352 | 2.0696 | 0.0035 | 0.015 | 0.995 | 241 | tags=55%,<br>list=25%,<br>signal=71%  |
| 401 | GSE30971_WBP7_HET VS_KO_MA<br>CROPHAGE_2H_LPS_STIM_UP                       | 29 | 0.348 | 2.0696 | 0.0073 | 0.015 | 0.995 | 291 | tags=62%,<br>list=30%,<br>signal=86%  |
| 402 | GSE24142_EARLY_THYMIC_PROG<br>ENITOR_VS_DN3_THYMOCYTE_U<br>P                | 29 | 0.353 | 2.0679 | 0      | 0.015 | 0.995 | 400 | tags=72%,<br>list=41%,<br>signal=119% |
| 403 | GSE3982_BCELL VS_TH2_UP                                                     | 26 | 0.363 | 2.0654 | 0.0037 | 0.016 | 0.995 | 170 | tags=46%,<br>list=17%,<br>signal=54%  |
| 404 | GSE11864_CSF1_IFNG VS_CSF1_P<br>AM3CYS_IN_MAC_UP                            | 23 | 0.387 | 2.0651 | 0.0019 | 0.016 | 0.996 | 387 | tags=78%,<br>list=40%,<br>signal=127% |

|     |                                                                                 |    |       |        |        |       |       |     |                                        |
|-----|---------------------------------------------------------------------------------|----|-------|--------|--------|-------|-------|-----|----------------------------------------|
| 405 | GSE22886_IGM_MEMORY_BCELL_VS_BLOOD_PLASMA_CELL_UP                               | 21 | 0.396 | 2.0639 | 0.0038 | 0.016 | 0.996 | 145 | tags=48%,<br>list=15%,<br>signal=55%   |
| 406 | GSE30962_ACUTE_VS_CHRONIC_LCMV_PRIMARY_INF_CD8_TCELL_UP                         | 20 | 0.414 | 2.0618 | 0.002  | 0.016 | 0.996 | 578 | tags=100%,<br>list=59%,<br>signal=241% |
| 407 | GSE17974_IL4_AND_ANTI_IL12_VS_UNTREATED_12H_ACT_CD4_TCELL_LL_DN                 | 17 | 0.447 | 2.0611 | 0.0052 | 0.016 | 0.996 | 138 | tags=53%,<br>list=14%,<br>signal=61%   |
| 408 | GSE14769_UNSTIM_VS_60MIN_LP_S_BMDM_DN                                           | 17 | 0.451 | 2.0599 | 0.0018 | 0.016 | 0.996 | 329 | tags=76%,<br>list=34%,<br>signal=113%  |
| 409 | GSE17301_IFNA2_VS_IFNA2_AND_ACD3_ACD28_STIM_CD8_TCELL_UP                        | 19 | 0.418 | 2.0593 | 0.008  | 0.016 | 0.996 | 290 | tags=68%,<br>list=30%,<br>signal=96%   |
| 410 | GSE360_T_GONDII_VS_B_MALAYI_HIGH_DOSE_DC_UP                                     | 23 | 0.392 | 2.0573 | 0.0019 | 0.016 | 0.999 | 237 | tags=57%,<br>list=24%,<br>signal=73%   |
| 411 | GSE15735_CTRL_VS_HDAC_INHIBITOR_TREATED_CD4_TCELL_2H_DN                         | 28 | 0.362 | 2.0534 | 0.0037 | 0.017 | 0.999 | 530 | tags=89%,<br>list=54%,<br>signal=190%  |
| 412 | GSE7509_DC_VS_MONOCYTE_UP                                                       | 27 | 0.365 | 2.0532 | 0.0165 | 0.017 | 0.999 | 269 | tags=59%,<br>list=28%,<br>signal=80%   |
| 413 | GSE29949_MICROGLIA_BRAIN_VS_CD8_NEG_DC_SPLEEN_UP                                | 17 | 0.448 | 2.0508 | 0.0018 | 0.017 | 0.999 | 177 | tags=59%,<br>list=18%,<br>signal=71%   |
| 414 | GSE20366_TREG_VS_TCONV_DN                                                       | 20 | 0.414 | 2.0498 | 0.0053 | 0.017 | 0.999 | 435 | tags=85%,<br>list=45%,<br>signal=150%  |
| 415 | GSE31082_DP_VS_CD8_SP_THYMOCYTE_DN                                              | 24 | 0.383 | 2.0476 | 0.0075 | 0.017 | 0.999 | 526 | tags=92%,<br>list=54%,<br>signal=194%  |
| 416 | GSE40274_FOXP3_VS_FOXP3_AND_LEF1_TRANSDUCED_ACTIVATE_D_CD4_TCELL_UP             | 24 | 0.376 | 2.0473 | 0.0018 | 0.017 | 0.999 | 379 | tags=75%,<br>list=39%,<br>signal=120%  |
| 417 | GSE34156_UNTREATED_VS_6H_NOD2_LIGAND_TREATED_MONOCYTE_DN                        | 28 | 0.356 | 2.0462 | 0.0037 | 0.017 | 1     | 364 | tags=71%,<br>list=37%,<br>signal=111%  |
| 418 | GSE19888_ADENOSINE_A3R_ACT_VS_A3R_ACT_WITH_A3R_INH_PRETREATMENT_IN_MAST_CELL_DN | 21 | 0.404 | 2.046  | 0.0036 | 0.017 | 1     | 243 | tags=62%,<br>list=25%,<br>signal=81%   |
| 419 | GSE36527_CD62L_HIGH_VS_CD62L_LOW_TREG_CD69_NEG_KLRG1_NEG_UP                     | 35 | 0.329 | 2.0413 | 0.0034 | 0.018 | 1     | 259 | tags=54%,<br>list=27%,<br>signal=71%   |
| 420 | GSE24574_BCL6_HIGH_VS_LOW_TFH_CD4_TCELL_UP                                      | 27 | 0.36  | 2.0377 | 0.0068 | 0.018 | 1     | 351 | tags=70%,<br>list=36%,<br>signal=107%  |
| 421 | GSE28130_ACTIVATED_VS_INDUCED_TREG_UP                                           | 25 | 0.362 | 2.0373 | 0      | 0.018 | 1     | 281 | tags=60%,<br>list=29%,<br>signal=82%   |
| 422 | GSE5455_HEALTHY_VS_TUMOR_BEARING_MOUSE_SPLEEN_MONOCYTE_DN                       | 24 | 0.372 | 2.0323 | 0.0037 | 0.019 | 1     | 576 | tags=96%,<br>list=59%,<br>signal=229%  |
| 423 | GSE13946_CTRL_VS_DSS_COLITIS_GD_TCELL_FROM_COLON_UP                             | 27 | 0.363 | 2.0317 | 0.0038 | 0.019 | 1     | 256 | tags=59%,<br>list=26%,<br>signal=78%   |
| 424 | GSE2405_0H_VS_3H_A_PHAGOCYTOPHILUM_STIM_NEUTROPHIL_UP                           | 16 | 0.454 | 2.0301 | 0.0055 | 0.019 | 1     | 351 | tags=81%,<br>list=36%,<br>signal=125%  |

|     |                                                                 |    |       |        |        |       |   |     |                                 |
|-----|-----------------------------------------------------------------|----|-------|--------|--------|-------|---|-----|---------------------------------|
| 425 | GSE3720_UNSTIM_VS_LPS_STIM_VD2_GAMMADelta_TCELL_UP              | 15 | 0.461 | 2.0298 | 0.0038 | 0.019 | 1 | 463 | tags=93%, list=48%, signal=175% |
| 426 | GSE19888_ADENOSINE_A3R_INH_VS_ACT_IN_MAST_CELL_DN               | 23 | 0.387 | 2.0293 | 0.0018 | 0.019 | 1 | 265 | tags=65%, list=27%, signal=87%  |
| 427 | GSE16385_IFNG_TNF_VS_UNSTIM_MACROPHAGE_ROSIGLITAZONE_TREATED_DN | 23 | 0.38  | 2.0277 | 0.0038 | 0.019 | 1 | 447 | tags=83%, list=46%, signal=149% |
| 428 | GSE28783_ANTI_MIR33_VS_UNTREATED_ATHEROSCLEROSIS_MACROPHAGE_DN  | 22 | 0.394 | 2.0276 | 0.0039 | 0.019 | 1 | 266 | tags=64%, list=27%, signal=86%  |
| 429 | GSE26030_TH1_VS_TH17_DAY15_POST_POLARIZATION_DN                 | 22 | 0.395 | 2.0269 | 0.0019 | 0.019 | 1 | 171 | tags=50%, list=18%, signal=59%  |
| 430 | GSE32034_LY6C_HIGH_VS_LOW_ROSIGLITAZONE_TREATED_MONOCYTE_UP     | 20 | 0.405 | 2.0234 | 0.0036 | 0.02  | 1 | 286 | tags=65%, list=29%, signal=90%  |
| 431 | GSE11057_NAIVE_VS_MEMORY_CD4_TCELL_DN                           | 28 | 0.354 | 2.0221 | 0.0038 | 0.02  | 1 | 138 | tags=43%, list=14%, signal=48%  |
| 432 | GSE17186_BLOOD_VS_CORD_BLOOD_CD21HIGH_TRANSITIONAL_BCELL_DN     | 16 | 0.45  | 2.0206 | 0.0036 | 0.02  | 1 | 382 | tags=81%, list=39%, signal=131% |
| 433 | GSE17721_PAM3CSK4_VS_GADIGUIMOD_6H_BMDC_DN                      | 20 | 0.403 | 2.0187 | 0.0106 | 0.02  | 1 | 329 | tags=70%, list=34%, signal=104% |
| 434 | GSE29618_MONOCYTE_VS_MDC_UP                                     | 33 | 0.326 | 2.0178 | 0.0018 | 0.02  | 1 | 413 | tags=76%, list=42%, signal=127% |
| 435 | GSE23398_WT_VS_IL2_KO_CD4_TCELL_SCURFY_MOUSE_UP                 | 23 | 0.385 | 2.0177 | 0.002  | 0.02  | 1 | 87  | tags=39%, list=9%, signal=42%   |
| 436 | GSE31082_DN_VS_CD4_SP_THYMOCYTE_DN                              | 16 | 0.448 | 2.0162 | 0.0037 | 0.02  | 1 | 387 | tags=81%, list=40%, signal=133% |
| 437 | GSE11057_CD4_CENT_MEM_VS_PBMC_DN                                | 25 | 0.368 | 2.016  | 0.0039 | 0.02  | 1 | 506 | tags=92%, list=52%, signal=187% |
| 438 | GSE24634_NAIVE_CD4_TCELL_VS_DAY3_IL4_CONV_TREG_UP               | 20 | 0.4   | 2.0096 | 0.0037 | 0.021 | 1 | 374 | tags=75%, list=38%, signal=119% |
| 439 | GSE7852_TREG_VS_TCONV_DN                                        | 23 | 0.375 | 2.0085 | 0.0054 | 0.021 | 1 | 420 | tags=78%, list=43%, signal=134% |
| 440 | GSE3982_MAST_CELL_VS_EFFECTIVE_MEMORY_CD4_TCELL_DN              | 25 | 0.372 | 2.0054 | 0.0019 | 0.021 | 1 | 526 | tags=92%, list=54%, signal=195% |
| 441 | GSE34006_WT_VS_A2AR_KO_TREG_DN                                  | 21 | 0.401 | 2.0037 | 0.0038 | 0.022 | 1 | 428 | tags=81%, list=44%, signal=141% |
| 442 | GSE4535_BM_DERIVED_DC_VS_FOLLICULAR_DC_UP                       | 23 | 0.369 | 2.0035 | 0.0126 | 0.022 | 1 | 239 | tags=57%, list=25%, signal=73%  |
| 443 | GSE13485_DAY7_VS_DAY21_YF17D_VACCINE_PBMC_UP                    | 18 | 0.416 | 2.0032 | 0.0052 | 0.022 | 1 | 380 | tags=78%, list=39%, signal=125% |
| 444 | KAECH_NAIVE_VS_DAY8_EFFECTIVE_CD8_TCELL_UP                      | 18 | 0.419 | 2.0023 | 0.0019 | 0.022 | 1 | 373 | tags=78%, list=38%, signal=124% |

|     |                                                                                                 |    |       |        |        |       |   |     |                                                                               |
|-----|-------------------------------------------------------------------------------------------------|----|-------|--------|--------|-------|---|-----|-------------------------------------------------------------------------------|
| 445 | GSE32164 RESTING DIFFERENTIAL<br>TED_VS_CMYC_INHIBITED_MAC<br>ROPHAGE_DN                        | 42 | 0.295 | 2.0018 | 0.0018 | 0.022 | 1 | 515 | tags=81%,<br>list=53%,<br>signal=164%                                         |
| 446 | GSE19888 ADENOSINE A3R_INH<br>VS_INH_PRETREAT_AND_ACT_WI<br>TH_TCELL_MEMBRANES_MAST_<br>CELL_UP | 22 | 0.388 | 2.0001 | 0      | 0.022 | 1 | 243 | tags=59%,<br>list=25%,<br>signal=77%<br>tags=90%,<br>list=51%,<br>signal=180% |
| 447 | GSE15733 BM_VS_SPLEEN_MEMO<br>RY_CD4_TCELL_UP                                                   | 21 | 0.397 | 1.9991 | 0.0054 | 0.022 | 1 | 494 | tags=82%,<br>list=40%,<br>signal=136%                                         |
| 448 | GSE40274_CTRL_VS_FOXP3_AND_<br>PBX1_TRANSDUCE_ACTIVATED<br>_CD4_TCELL_UP                        | 17 | 0.438 | 1.999  | 0.0019 | 0.022 | 1 | 394 | tags=46%,<br>list=20%,<br>signal=55%                                          |
| 449 | GSE24634_IL4_VS_CTRL_TREATE<br>D_NAIVE_CD4_TCELL_DAY5_UP                                        | 35 | 0.304 | 1.998  | 0.0073 | 0.022 | 1 | 195 | tags=88%,<br>list=46%,<br>signal=159%                                         |
| 450 | GSE15330 GRANULOCYTE_MONO<br>CYTE_PROGENITOR_VS_PRO_BCE<br>LL_DN                                | 17 | 0.432 | 1.9976 | 0.0075 | 0.022 | 1 | 444 | tags=95%,<br>list=54%,<br>signal=204%                                         |
| 451 | GSE37301_MULTIPOTENT_PROGE<br>NITOR_VS_CD4_TCELL_UP                                             | 19 | 0.41  | 1.997  | 0.0036 | 0.022 | 1 | 530 | tags=74%,<br>list=43%,<br>signal=127%                                         |
| 452 | GSE3039_CD4_TCELL_VS_ALPHA<br>BETA_CD8_TCELL_UP                                                 | 27 | 0.346 | 1.9968 | 0.0107 | 0.022 | 1 | 422 | tags=86%,<br>list=49%,<br>signal=164%                                         |
| 453 | GSE7348_UNSTIM_VS_LPS_STIM_<br>MACROPHAGE_DN                                                    | 22 | 0.377 | 1.9963 | 0.0055 | 0.022 | 1 | 473 | tags=74%,<br>list=35%,<br>signal=111%                                         |
| 454 | GSE37533_PPARG2_FOXP3_VS_FO<br>XP3_TRANSDUCE_CD4_TCELL_P<br>IOGLITAZONE_TREATED_DN              | 19 | 0.416 | 1.9944 | 0.0058 | 0.022 | 1 | 340 | tags=84%,<br>list=47%,<br>signal=156%                                         |
| 455 | GSE24142_EARLY_THYMIC_PROG<br>ENITOR_VS_DN3_THYMOCYTE_F<br>ETAL_UP                              | 25 | 0.378 | 1.9937 | 0.004  | 0.022 | 1 | 462 | tags=78%,<br>list=43%,<br>signal=135%                                         |
| 456 | GSE28783_ANTI_MIR33_VS_UNTR<br>EATED_ATHEROSCLEROSIS_MAC<br>ROPHAGE_UP                          | 23 | 0.379 | 1.9914 | 0.0037 | 0.023 | 1 | 422 | tags=50%,<br>list=16%,<br>signal=59%                                          |
| 457 | GSE24574_BCL6_HIGH_TFH_VS_T<br>CONV_CD4_TCELL_DN                                                | 20 | 0.4   | 1.9898 | 0.0096 | 0.023 | 1 | 159 | tags=42%,<br>list=14%,<br>signal=47%                                          |
| 458 | GSE43955_10H_VS_30H_ACT_CD4_<br>TCELL_UP                                                        | 24 | 0.364 | 1.989  | 0.0057 | 0.023 | 1 | 133 | tags=42%,<br>list=18%,<br>signal=49%                                          |
| 459 | GSE39110_UNTREATED_VS_IL2_T<br>REATED_CD8_TCELL_DAY6_POST<br>_IMMUNIZATION_UP                   | 36 | 0.307 | 1.989  | 0.0018 | 0.023 | 1 | 173 | tags=94%,<br>list=52%,<br>signal=192%                                         |
| 460 | GSE3982_MAST_CELL_VS_NEUTR<br>OPHIL_DN                                                          | 17 | 0.438 | 1.9886 | 0.0074 | 0.023 | 1 | 504 | tags=86%,<br>list=48%,<br>signal=161%                                         |
| 461 | GSE28726_NAIVE_CD4_TCELL_VS<br>_NAIVE_NKTCELL_DN                                                | 21 | 0.395 | 1.9863 | 0      | 0.023 | 1 | 467 | tags=53%,<br>list=26%,<br>signal=70%                                          |
| 462 | GSE15330_MEGAKARYOCYTE_ER<br>YTHROID_VS GRANULOCYTE_M<br>ONOCYTE_PROGENITOR_UP                  | 30 | 0.328 | 1.9843 | 0.0018 | 0.023 | 1 | 256 | tags=96%,<br>list=58%,<br>signal=224%                                         |
| 463 | GSE37301_CD4_TCELL_VS GRAN<br>ULOCYTE_MONOCYTE_PROGENI<br>TOR_DN                                | 23 | 0.374 | 1.9839 | 0.0073 | 0.023 | 1 | 567 | tags=58%,<br>list=21%,<br>signal=72%                                          |
| 464 | GSE360_HIGH_VS_LOW_DOSE_B_<br>MALAYI_MAC_UP                                                     | 19 | 0.403 | 1.9836 | 0.0074 | 0.023 | 1 | 207 |                                                                               |

|     |                                                                            |    |       |        |        |       |   |     |                                       |
|-----|----------------------------------------------------------------------------|----|-------|--------|--------|-------|---|-----|---------------------------------------|
| 465 | GSE17301_CTRL_VS_48H_IFNA2_S<br>TIM_CD8_TCELL_DN                           | 23 | 0.373 | 1.9821 | 0.0076 | 0.023 | 1 | 533 | tags=91%,<br>list=55%,<br>signal=197% |
| 466 | GSE411_WT_VS_SOCS3_KO_MACR<br>OPHAGE_IL6_STIM_400MIN_UP                    | 22 | 0.385 | 1.9783 | 0.0055 | 0.024 | 1 | 176 | tags=50%,<br>list=18%,<br>signal=60%  |
| 467 | GSE1460_CD4_THYMOCYTE_VS_T<br>HYMIC_STROMAL_CELL_UP                        | 23 | 0.365 | 1.9738 | 0.0038 | 0.025 | 1 | 585 | tags=96%,<br>list=60%,<br>signal=234% |
| 468 | GSE1460_DP_THYMOCYTE_VS_N<br>AIVE_CD4_TCELL_ADULT_BLOO<br>D_DN             | 30 | 0.325 | 1.9737 | 0.0035 | 0.025 | 1 | 536 | tags=87%,<br>list=55%,<br>signal=187% |
| 469 | GSE5589_WT_VS_IL10_KO_LPS_ST<br>IM_MACROPHAGE_180MIN_UP                    | 16 | 0.442 | 1.9723 | 0.0036 | 0.025 | 1 | 237 | tags=63%,<br>list=24%,<br>signal=81%  |
| 470 | GSE22886_NAIVE_CD4_TCELL_VS<br>_NKCELL_UP                                  | 27 | 0.348 | 1.9717 | 0.0036 | 0.025 | 1 | 539 | tags=89%,<br>list=55%,<br>signal=194% |
| 471 | GSE21670_STAT3_KO_VS_WT_CD4<br>_TCELL_TGFB_IL6_TREATED_DN                  | 30 | 0.335 | 1.9695 | 0.0088 | 0.025 | 1 | 434 | tags=77%,<br>list=45%,<br>signal=134% |
| 472 | GSE2128_CTRL_VS_MIMETOPE_N<br>EGATIVE_SELECTION_DP_THYM<br>OCYTE_C57BL6_UP | 19 | 0.399 | 1.9689 | 0.0113 | 0.025 | 1 | 351 | tags=74%,<br>list=36%,<br>signal=113% |
| 473 | GSE3982_DC_VS_TH2_UP                                                       | 24 | 0.36  | 1.9688 | 0.0056 | 0.025 | 1 | 310 | tags=63%,<br>list=32%,<br>signal=89%  |
| 474 | GSE29618_MONOCYTE_VS_MDC_<br>DAY7_FLU_VACCINE_DN                           | 34 | 0.314 | 1.9681 | 0.0071 | 0.025 | 1 | 315 | tags=59%,<br>list=32%,<br>signal=84%  |
| 475 | GSE5503_MLN_DC_VS_SPLEEN_D<br>C_ACTIVATED_ALLOGENIC_TCEL<br>L_UP           | 18 | 0.409 | 1.9679 | 0.011  | 0.025 | 1 | 395 | tags=78%,<br>list=41%,<br>signal=128% |
| 476 | GSE2706_R848_VS_LPS_2H_STIM_<br>DC_DN                                      | 15 | 0.469 | 1.9676 | 0.0074 | 0.025 | 1 | 237 | tags=67%,<br>list=24%,<br>signal=87%  |
| 477 | GSE339_CD8POS_VS_CD4CD8DN_<br>DC_UP                                        | 21 | 0.391 | 1.9664 | 0.0112 | 0.025 | 1 | 479 | tags=86%,<br>list=49%,<br>signal=165% |
| 478 | GSE360_T_GONDII_VS_B_MALAYI<br>_HIGH_DOSE_MAC_DN                           | 38 | 0.292 | 1.9662 | 0.0056 | 0.025 | 1 | 526 | tags=82%,<br>list=54%,<br>signal=170% |
| 479 | GSE19923_WT_VS_HEB_AND_E2A<br>_KO_DP_THYMOCYTE_DN                          | 24 | 0.36  | 1.9653 | 0.0036 | 0.025 | 1 | 422 | tags=79%,<br>list=43%,<br>signal=136% |
| 480 | GSE34156_UNTREATED_VS_24H_N<br>OD2_LIGAND_TREATED_MONOC<br>YTE_DN          | 34 | 0.308 | 1.9647 | 0.0051 | 0.025 | 1 | 537 | tags=85%,<br>list=55%,<br>signal=183% |
| 481 | GSE24634_TEFF_VS_TCONV_DAY1<br>0_IN_CULTURE_DN                             | 35 | 0.303 | 1.964  | 0.0075 | 0.025 | 1 | 321 | tags=60%,<br>list=33%,<br>signal=86%  |
| 482 | GSE20366_TREG_VS_NAIVE_CD4_<br>TCELL_HOMEOSTATIC_CONVERS<br>ION_DN         | 17 | 0.428 | 1.9634 | 0.0037 | 0.026 | 1 | 406 | tags=82%,<br>list=42%,<br>signal=139% |
| 483 | GSE34006_A2AR_KO_VS_A2AR_A<br>GONIST_TREATED_TREG_UP                       | 23 | 0.366 | 1.9619 | 0.0074 | 0.026 | 1 | 428 | tags=78%,<br>list=44%,<br>signal=136% |
| 484 | GSE41176_WT_VS_TAK1_KO_ANTI<br>_IGM_STIM_BCELL_6H_DN                       | 32 | 0.323 | 1.9602 | 0.0094 | 0.026 | 1 | 240 | tags=53%,<br>list=25%,<br>signal=68%  |



|     |                                                                          |    |       |        |        |       |   |     |                                 |
|-----|--------------------------------------------------------------------------|----|-------|--------|--------|-------|---|-----|---------------------------------|
| 485 | GSE5455_HEALTHY_VS_TUMOR_BEARING_MOUSE_SPLEEN_MONOCYTE_24H_INCUBATION_DN | 17 | 0.419 | 1.96   | 0.0056 | 0.026 | 1 | 303 | tags=71%, list=31%, signal=101% |
| 486 | GSE12392_IFNAR_KO_VS_IFNB_KO_CD8_NEG_SPLEEN_DC_DN                        | 27 | 0.344 | 1.9594 | 0.0035 | 0.026 | 1 | 477 | tags=81%, list=49%, signal=155% |
| 487 | GSE25123_WT_VS_PPARG_KO_MACROPHAGE_ROSIGLITAZONE_STIM_DN                 | 20 | 0.392 | 1.9583 | 0.0109 | 0.026 | 1 | 428 | tags=80%, list=44%, signal=140% |
| 488 | GSE17721_ALL_VS_24H_PAM3CSK4_BMDC_UP                                     | 25 | 0.353 | 1.9568 | 0.0147 | 0.026 | 1 | 220 | tags=52%, list=23%, signal=65%  |
| 489 | GSE42088_UNINF_VS_LEISHMANIA_INF_DC_2H_DN                                | 20 | 0.386 | 1.9559 | 0.0094 | 0.026 | 1 | 556 | tags=95%, list=57%, signal=217% |
| 490 | GSE19401_UNSTIM_VS_RETINOIC_ACID_STIM_FOLLICULAR_DC_DN                   | 29 | 0.339 | 1.9507 | 0.0036 | 0.027 | 1 | 260 | tags=55%, list=27%, signal=73%  |
| 491 | GSE9650_NAIVE_VS_EXHAUSTED_CD8_TCELL_UP                                  | 21 | 0.384 | 1.9503 | 0.0075 | 0.027 | 1 | 432 | tags=81%, list=44%, signal=142% |
| 492 | GSE18281_CORTICAL_VS_MEDULLARY_THYMOCYTE_DN                              | 16 | 0.435 | 1.95   | 0.0055 | 0.027 | 1 | 488 | tags=94%, list=50%, signal=185% |
| 493 | GSE39556_UNTREATED_VS_3H_POLYIC_INJ_MOUSE_CD8A_DC_UP                     | 44 | 0.276 | 1.9482 | 0.0035 | 0.027 | 1 | 241 | tags=50%, list=25%, signal=63%  |
| 494 | GSE43955_1H_VS_20H_ACT_CD4_TCELL_WITH_TGFB_IL6_DN                        | 27 | 0.352 | 1.9478 | 0.014  | 0.027 | 1 | 187 | tags=48%, list=19%, signal=58%  |
| 495 | GSE6269_FLU_VS_STAPH_AUREUS_INF_PBMC_UP                                  | 22 | 0.371 | 1.9464 | 0.0171 | 0.027 | 1 | 379 | tags=73%, list=39%, signal=116% |
| 496 | GSE12366_GC_VS_NAIVE_BCELL_DN                                            | 28 | 0.336 | 1.9449 | 0      | 0.028 | 1 | 390 | tags=71%, list=40%, signal=116% |
| 497 | GSE12366_NAIVE_VS_MEMORY_BCELL_DN                                        | 24 | 0.363 | 1.9442 | 0.0073 | 0.028 | 1 | 227 | tags=54%, list=23%, signal=69%  |
| 498 | GSE22886_CD8_VS_CD4_NAIVE_TCELL_DN                                       | 17 | 0.413 | 1.9435 | 0.0112 | 0.028 | 1 | 218 | tags=59%, list=22%, signal=74%  |
| 499 | GSE3920_UNTREATED_VS_IFNG_TREATED_ENDOTHELIAL_CELL_UP                    | 17 | 0.423 | 1.9435 | 0.0057 | 0.028 | 1 | 296 | tags=71%, list=30%, signal=100% |
| 500 | GSE39820_CTRL_VS_IL1B_IL6_IL23A_CD4_TCELL_DN                             | 23 | 0.372 | 1.9433 | 0.0096 | 0.028 | 1 | 189 | tags=52%, list=19%, signal=63%  |
| 501 | GSE360_CTRL_VS_L_MAJOR_DC_DN                                             | 19 | 0.395 | 1.9432 | 0.0058 | 0.028 | 1 | 303 | tags=68%, list=31%, signal=97%  |
| 502 | GSE11961_UNSTIM_VS_ANTI_IGM_AND_CD40_STIM_6H_FOLLICULAR_BCELL_DN         | 22 | 0.384 | 1.9426 | 0.0113 | 0.028 | 1 | 244 | tags=59%, list=25%, signal=77%  |
| 503 | GSE40274_LEF1_VS_FOXP3_AND_LEF1_TRANSDUCED_ACTIVATED_CD4_TCELL_DN        | 17 | 0.425 | 1.9413 | 0.0056 | 0.028 | 1 | 256 | tags=65%, list=26%, signal=86%  |
| 504 | GSE360_HIGH_DOSE_B_MALAYI_VS_M_TUBERCULOSIS_MAC_DN                       | 26 | 0.344 | 1.9406 | 0.0094 | 0.028 | 1 | 239 | tags=54%, list=25%, signal=69%  |

|     |                                                                                                 |    |       |        |        |       |   |     |                                        |
|-----|-------------------------------------------------------------------------------------------------|----|-------|--------|--------|-------|---|-----|----------------------------------------|
| 505 | GSE21063_WT_VS_NFATC1_KO_3<br>H_ANTI_IGM_STIM_BCELL_UP                                          | 17 | 0.417 | 1.9403 | 0.0056 | 0.028 | 1 | 260 | tags=65%,<br>list=27%,<br>signal=87%   |
| 506 | GSE15930_STIM_VS_STIM_AND_T<br>RICHOSTATINA_48H_CD8_T_CELL<br>_UP                               | 24 | 0.358 | 1.9389 | 0      | 0.028 | 1 | 260 | tags=58%,<br>list=27%,<br>signal=78%   |
| 507 | GSE14769_UNSTIM_VS_80MIN_LP<br>S_BMDM_DN                                                        | 24 | 0.36  | 1.938  | 0      | 0.028 | 1 | 254 | tags=58%,<br>list=26%,<br>signal=77%   |
| 508 | GSE43955_1H_VS_60H_ACT_CD4_T<br>CELL_UP                                                         | 26 | 0.347 | 1.9357 | 0.0094 | 0.028 | 1 | 373 | tags=69%,<br>list=38%,<br>signal=109%  |
| 509 | GSE9878_CTRL_VS_EBF_TRANSD<br>UCED_PAX5_KO_PRO_BCELL_UP                                         | 15 | 0.434 | 1.9352 | 0.0074 | 0.028 | 1 | 272 | tags=67%,<br>list=28%,<br>signal=91%   |
| 510 | GSE1791_CTRL_VS_NEUROMEDIN<br>U_IN_T_CELL_LINE_12H_DN                                           | 15 | 0.446 | 1.9343 | 0.0132 | 0.029 | 1 | 257 | tags=67%,<br>list=26%,<br>signal=89%   |
| 511 | GSE1460_DP_THYMOCYTE_VS_N<br>AIVE_CD4_TCELL_CORD_BLOOD_<br>DN                                   | 15 | 0.443 | 1.9318 | 0.0078 | 0.029 | 1 | 548 | tags=100%,<br>list=56%,<br>signal=225% |
| 512 | GSE22601_IMMATURE_CD4_SING<br>LE_POSITIVE_VS_CD8_SINGLE_P<br>OSITIVE_THYMOCYTE_UP               | 26 | 0.348 | 1.9304 | 0.0036 | 0.029 | 1 | 421 | tags=77%,<br>list=43%,<br>signal=132%  |
| 513 | GSE3982_CENT_MEMORY_CD4_T<br>CELL_VS_TH2_UP                                                     | 19 | 0.392 | 1.9261 | 0.0018 | 0.03  | 1 | 244 | tags=58%,<br>list=25%,<br>signal=76%   |
| 514 | GSE37534_UNTREATED_VS_ROSI<br>GLITAZONE_TREATED_CD4_TCEL<br>L_PPARG1_AND_FOXP3_TRASDU<br>CED_DN | 30 | 0.325 | 1.9253 | 0.0074 | 0.03  | 1 | 486 | tags=80%,<br>list=50%,<br>signal=155%  |
| 515 | GSE1460_INTRATHYMIC_T_PROG<br>ENITOR_VS_NAIVE_CD4_TCELL_<br>CORD_BLOOD_DN                       | 15 | 0.435 | 1.9221 | 0.0133 | 0.03  | 1 | 495 | tags=93%,<br>list=51%,<br>signal=187%  |
| 516 | GSE4590_LARGE_PRE_BCELL_VS_<br>VPREB_POS_LARGE_PRE_BCELL_<br>DN                                 | 21 | 0.377 | 1.9206 | 0.0128 | 0.031 | 1 | 571 | tags=95%,<br>list=59%,<br>signal=225%  |
| 517 | GSE360_DC_VS_MAC_L_DONOVA<br>NI_UP                                                              | 20 | 0.391 | 1.9203 | 0.0097 | 0.031 | 1 | 208 | tags=55%,<br>list=21%,<br>signal=68%   |
| 518 | GSE43863_TH1_VS_LY6C_INT_CX<br>CR5POS_MEMORY_CD4_TCELL_D<br>N                                   | 16 | 0.427 | 1.9197 | 0.0136 | 0.031 | 1 | 159 | tags=50%,<br>list=16%,<br>signal=59%   |
| 519 | GSE1432_6H_VS_24H_IFNG_MICR<br>OGLIA_DN                                                         | 24 | 0.355 | 1.9195 | 0.009  | 0.031 | 1 | 257 | tags=58%,<br>list=26%,<br>signal=77%   |
| 520 | GSE20715_0H_VS_24H_OZONE_TL<br>R4_KO_LUNG_UP                                                    | 24 | 0.359 | 1.9176 | 0.0125 | 0.031 | 1 | 442 | tags=79%,<br>list=45%,<br>signal=141%  |
| 521 | GSE2706_R848_VS_R848_AND_LPS<br>_8H_STIM_DC_UP                                                  | 18 | 0.402 | 1.9148 | 0.0037 | 0.031 | 1 | 321 | tags=72%,<br>list=33%,<br>signal=106%  |
| 522 | GSE26343_WT_VS_NFAT5_KO_MA<br>CROPHAGE_DN                                                       | 17 | 0.405 | 1.9128 | 0.0039 | 0.032 | 1 | 381 | tags=76%,<br>list=39%,<br>signal=123%  |
| 523 | GSE9509_LPS_VS_LPS_AND_IL10<br>STIM_IL10_KO_MACROPHAGE_10<br>MIN_UP                             | 18 | 0.407 | 1.9126 | 0.0055 | 0.032 | 1 | 111 | tags=44%,<br>list=11%,<br>signal=49%   |
| 524 | GSE22886_DAY1_VS_DAY7_MONO<br>CYTE_IN_CULTURE_UP                                                | 25 | 0.35  | 1.9102 | 0.0108 | 0.032 | 1 | 512 | tags=88%,<br>list=53%,<br>signal=181%  |

|     |                                                                                     |    |       |        |        |       |   |     |                                        |
|-----|-------------------------------------------------------------------------------------|----|-------|--------|--------|-------|---|-----|----------------------------------------|
| 525 | GSE20715_WT_VS_TLR4_KO_LUN<br>G_UP                                                  | 19 | 0.4   | 1.9099 | 0.0129 | 0.032 | 1 | 174 | tags=53%,<br>list=18%,<br>signal=63%   |
| 526 | GSE45365_NK_CELL_VS_CD11B_D<br>C_MCMV_INFECTION_DN                                  | 23 | 0.353 | 1.908  | 0.0056 | 0.032 | 1 | 220 | tags=52%,<br>list=23%,<br>signal=66%   |
| 527 | GSE37534_GW1929_VS_PIOGLITAZ<br>ONE_TREATED_CD4_TCELL_PPAR<br>G1_FOXP3_TRANSDUCE_UP | 20 | 0.38  | 1.9079 | 0.0018 | 0.032 | 1 | 257 | tags=60%,<br>list=26%,<br>signal=80%   |
| 528 | GSE11864_CSF1_PAM3CYS_VS_CS<br>F1_IFNG_PAM3CYS_IN_MAC_UP                            | 15 | 0.432 | 1.9074 | 0.0093 | 0.032 | 1 | 303 | tags=73%,<br>list=31%,<br>signal=105%  |
| 529 | GSE24574_BCL6_HIGH_TFH_VS_T<br>FH_CD4_TCELL_UP                                      | 20 | 0.381 | 1.9073 | 0.0058 | 0.032 | 1 | 143 | tags=45%,<br>list=15%,<br>signal=52%   |
| 530 | GSE2770_IL4_ACT_VS_ACT_CD4_T<br>CELL_48H_DN                                         | 16 | 0.417 | 1.9027 | 0.0092 | 0.033 | 1 | 193 | tags=56%,<br>list=20%,<br>signal=69%   |
| 531 | GSE34156_UNTREATED_VS_6H_N<br>OD2_AND_TLR1_TLR2_LIGAND_T<br>REATED_MONOCYTE_DN      | 19 | 0.387 | 1.9017 | 0.0074 | 0.033 | 1 | 243 | tags=58%,<br>list=25%,<br>signal=76%   |
| 532 | GSE9601_NFKB_INHIBITOR_VS_PI<br>3K_INHIBITOR_TREATED_HCMV_<br>INF_MONOCYTE_DN       | 29 | 0.322 | 1.9003 | 0.009  | 0.033 | 1 | 248 | tags=52%,<br>list=25%,<br>signal=67%   |
| 533 | GSE30153_LUPUS_VS_HEALTHY_<br>DONOR_BCELL_DN                                        | 23 | 0.354 | 1.9003 | 0.0128 | 0.033 | 1 | 544 | tags=91%,<br>list=56%,<br>signal=202%  |
| 534 | GSE17974_2.5H_VS_72H_IL4_AND_<br>ANTI_IL12_ACT_CD4_TCELL_UP                         | 19 | 0.38  | 1.8974 | 0.0092 | 0.034 | 1 | 465 | tags=84%,<br>list=48%,<br>signal=158%  |
| 535 | GSE3982_BCELL_VS_NKCELL_UP                                                          | 23 | 0.361 | 1.8969 | 0.0037 | 0.034 | 1 | 390 | tags=74%,<br>list=40%,<br>signal=120%  |
| 536 | GSE7568_IL4_VS_IL4_AND_DEXA<br>METHASONE_TREATED_MACROP<br>HAGE_DN                  | 16 | 0.424 | 1.8968 | 0.0113 | 0.034 | 1 | 502 | tags=94%,<br>list=52%,<br>signal=190%  |
| 537 | GSE13484_12H_UNSTIM_VS_YF17<br>D_VACCINE_STIM_PBMC_DN                               | 24 | 0.356 | 1.8952 | 0.013  | 0.034 | 1 | 411 | tags=75%,<br>list=42%,<br>signal=127%  |
| 538 | GSE11057_PBMC_VS_MEM_CD4_T<br>CELL_DN                                               | 28 | 0.333 | 1.895  | 0.0092 | 0.034 | 1 | 551 | tags=89%,<br>list=57%,<br>signal=200%  |
| 539 | GSE1925_CTRL_VS_IFNG_PRIMED<br>_MACROPHAGE_24H_IFNG_STIM_<br>UP                     | 19 | 0.386 | 1.8916 | 0.0058 | 0.035 | 1 | 201 | tags=53%,<br>list=21%,<br>signal=65%   |
| 540 | GSE3039_ALPHAALPHA_CD8_TCE<br>LL_VS_B1_BCELL_UP                                     | 16 | 0.411 | 1.8911 | 0.0057 | 0.035 | 1 | 463 | tags=88%,<br>list=48%,<br>signal=164%  |
| 541 | GSE22501_PERIPHERAL_BLOOD_V<br>S_CORD_BLOOD_TREG_DN                                 | 25 | 0.343 | 1.8905 | 0.0144 | 0.035 | 1 | 140 | tags=44%,<br>list=14%,<br>signal=50%   |
| 542 | GSE22140_GERMFREE_VS_SPF_AR<br>THRITIC_MOUSE_CD4_TCELL_UP                           | 24 | 0.359 | 1.8887 | 0.0098 | 0.035 | 1 | 267 | tags=58%,<br>list=27%,<br>signal=78%   |
| 543 | GSE19772_HCMV_INFL_VS_HCMV<br>_INF_MONOCYTES_AND_PI3K_IN<br>HIBITION_UP             | 16 | 0.417 | 1.8881 | 0.0094 | 0.035 | 1 | 348 | tags=75%,<br>list=36%,<br>signal=115%  |
| 544 | GSE3982_MAC_VS_NEUTROPHIL_<br>DN                                                    | 15 | 0.436 | 1.8878 | 0.0166 | 0.035 | 1 | 555 | tags=100%,<br>list=57%,<br>signal=229% |

|     |                                                               |    |       |        |        |       |   |     |                                       |
|-----|---------------------------------------------------------------|----|-------|--------|--------|-------|---|-----|---------------------------------------|
| 545 | GSE6259_DEC205_POS_DC_VS_BCELL_DN                             | 19 | 0.394 | 1.8877 | 0.0166 | 0.035 | 1 | 384 | tags=74%,<br>list=39%,<br>signal=119% |
| 546 | GSE33292_WT_VS_TCF1_KO_DN3_THYMOCYTE_UP                       | 18 | 0.396 | 1.8868 | 0.0131 | 0.035 | 1 | 486 | tags=89%,<br>list=50%,<br>signal=174% |
| 547 | GSE12366_GC_VS_MEMORY_BCELL_DN                                | 18 | 0.4   | 1.8866 | 0.011  | 0.035 | 1 | 482 | tags=89%,<br>list=49%,<br>signal=173% |
| 548 | GSE21546_WT_VS_SAPIA_KO_ANTI_CD3_STIM_DP_THYMOCYTES_UP        | 18 | 0.393 | 1.8858 | 0.0075 | 0.035 | 1 | 267 | tags=61%,<br>list=27%,<br>signal=83%  |
| 549 | GSE7509_DC_VS_MONOCYTE_DN                                     | 29 | 0.325 | 1.8841 | 0.0037 | 0.036 | 1 | 240 | tags=52%,<br>list=25%,<br>signal=67%  |
| 550 | GSE13522_WT_VS_IFNAR_KO_SKIN_DN                               | 26 | 0.334 | 1.8841 | 0.0198 | 0.036 | 1 | 275 | tags=58%,<br>list=28%,<br>signal=78%  |
| 551 | GSE360_CTRL_VS_L_DONOVANI_DC_DN                               | 20 | 0.374 | 1.8835 | 0.0092 | 0.036 | 1 | 220 | tags=55%,<br>list=23%,<br>signal=70%  |
| 552 | GSE25123_WT_VS_PPARG_KO_MACROPHAGE_ROSIGLITAZONE_STIM_UP      | 17 | 0.407 | 1.8823 | 0.0108 | 0.036 | 1 | 232 | tags=59%,<br>list=24%,<br>signal=76%  |
| 553 | GSE12392_WT_VS_IFNAR_KO_CD8A_NEG_SPLEEN_DC_UP                 | 31 | 0.307 | 1.8815 | 0.0108 | 0.036 | 1 | 558 | tags=87%,<br>list=57%,<br>signal=197% |
| 554 | GSE45365_NK_CELL_VS_BCELL_MCMV_INFECTION_DN                   | 24 | 0.349 | 1.8802 | 0.0092 | 0.036 | 1 | 282 | tags=58%,<br>list=29%,<br>signal=80%  |
| 555 | GSE29618_BCELL_VS_MONOCYTE_DN                                 | 24 | 0.355 | 1.8799 | 0.0088 | 0.036 | 1 | 413 | tags=75%,<br>list=42%,<br>signal=127% |
| 556 | GSE33425_CD161_HIGH_VS_NEG_CD8_TCELL_UP                       | 34 | 0.294 | 1.8793 | 0.0055 | 0.036 | 1 | 323 | tags=59%,<br>list=33%,<br>signal=85%  |
| 557 | GSE21063_WT_VS_NFATC1_KO_BCELL_UP                             | 21 | 0.374 | 1.8791 | 0.0098 | 0.036 | 1 | 362 | tags=71%,<br>list=37%,<br>signal=111% |
| 558 | GSE11057_CD4_EFF_MEM_VS_PBMC_DN                               | 27 | 0.332 | 1.8778 | 0.0169 | 0.036 | 1 | 519 | tags=85%,<br>list=53%,<br>signal=177% |
| 559 | GSE45365_HEALTHY_VS_MCMV_INFECTION_CD8A_DC_DN                 | 22 | 0.36  | 1.8776 | 0.0096 | 0.036 | 1 | 431 | tags=77%,<br>list=44%,<br>signal=135% |
| 560 | GSE369_SOCS3_KO_VS_WT_LIVER_POST_IL6_INJECTION_DN             | 23 | 0.353 | 1.8754 | 0.0128 | 0.037 | 1 | 389 | tags=74%,<br>list=40%,<br>signal=120% |
| 561 | GSE21546_WT_VS_SAPIA_KO_AND_ELK1_KO_DP_THYMOCYTES_UP          | 15 | 0.426 | 1.8742 | 0.013  | 0.037 | 1 | 392 | tags=80%,<br>list=40%,<br>signal=132% |
| 562 | GSE7460_WT_VS_FOXP3_HET_ACT_WITH_TGFB_TCONV_UP                | 16 | 0.415 | 1.8727 | 0.0092 | 0.037 | 1 | 465 | tags=88%,<br>list=48%,<br>signal=165% |
| 563 | GSE14415_INDUCED_TREG_VS_FOXP3_KO_INDUCED_TREG_IL2_CULTURE_UP | 27 | 0.339 | 1.8716 | 0.0119 | 0.037 | 1 | 256 | tags=56%,<br>list=26%,<br>signal=73%  |
| 564 | GSE12845_NAIVE_VS_DARKZONE_GC_TONSIL_BCELL_UP                 | 19 | 0.384 | 1.8715 | 0.002  | 0.037 | 1 | 555 | tags=95%,<br>list=57%,<br>signal=216% |

|     |                                                                     |    |       |        |        |       |   |     |                                 |
|-----|---------------------------------------------------------------------|----|-------|--------|--------|-------|---|-----|---------------------------------|
| 565 | GSE21670_STAT3_KO_VS_WT_CD4_TCELL_UP                                | 28 | 0.323 | 1.8694 | 0.0164 | 0.038 | 1 | 463 | tags=79%, list=48%, signal=145% |
| 566 | GSE14769_UNSTIM_VS_40MIN_LP_S_BMDM_DN                               | 22 | 0.365 | 1.8693 | 0.0226 | 0.038 | 1 | 340 | tags=68%, list=35%, signal=102% |
| 567 | GSE37532_WT_VS_PPARG_KO_VIS_CERAL_ADIPOSE_TISSUE_TCONV_UP           | 19 | 0.385 | 1.8666 | 0.0109 | 0.038 | 1 | 556 | tags=95%, list=57%, signal=216% |
| 568 | GSE24574_BCL6_HIGH_TFH_VS_TFH_CD4_TCELL_DN                          | 21 | 0.365 | 1.8663 | 0.0132 | 0.038 | 1 | 432 | tags=81%, list=44%, signal=142% |
| 569 | GSE18804_SPLEEN_MACROPHAGE_VS_COLON_TUMORAL_MACROPHAGE_UP           | 33 | 0.302 | 1.8661 | 0.0055 | 0.038 | 1 | 542 | tags=85%, list=56%, signal=185% |
| 570 | GSE45739_UNSTIM_VS_ACD3_ACID28_STIM_WT_CD4_TCELL_DN                 | 43 | 0.268 | 1.8654 | 0.0146 | 0.038 | 1 | 357 | tags=79%, list=39%, signal=88%  |
| 571 | GSE37301_COMMON_LYMPHOID_PROGENITOR_VS_GRAN_MONO_PROGENITOR_DN      | 19 | 0.38  | 1.86   | 0.0073 | 0.039 | 1 | 383 | tags=59%, list=25%, signal=128% |
| 572 | GSE3982_CENT_MEMORY_CD4_TCELL_VS_TH1_UP                             | 17 | 0.4   | 1.8594 | 0.0073 | 0.039 | 1 | 248 | tags=78%, list=37%, signal=99%  |
| 573 | GSE5542_UNTREATED_VS_IFNG_TREATED_EPITHELIAL_CELLS_6H_DN            | 28 | 0.323 | 1.8578 | 0.0151 | 0.04  | 1 | 357 | tags=59%, list=28%, signal=80%  |
| 574 | GSE30971_CTRL_VS_LPS_STIM_MACROPHAGE_WBP7_KO_2H_DN                  | 22 | 0.35  | 1.8576 | 0.0186 | 0.04  | 1 | 271 | tags=72%, list=37%, signal=113% |
| 575 | GSE17721_0.5H_VS_24H_POLYIC_BMDC_DN                                 | 18 | 0.386 | 1.8562 | 0.0071 | 0.04  | 1 | 364 | tags=67%, list=37%, signal=104% |
| 576 | GSE2585_THYMIC_DC_VS_MTEC_DN                                        | 24 | 0.334 | 1.856  | 0.0074 | 0.04  | 1 | 364 | tags=84%, list=48%, signal=157% |
| 577 | GSE39916_B_CELL_SPLEEN_VS_PLASMA_CELL_BONE_MARROW_DN                | 19 | 0.383 | 1.8555 | 0.0124 | 0.04  | 1 | 463 | tags=38%, list=15%, signal=44%  |
| 578 | GSE22886_NAIVE_BCELL_VS_BM_PLASMA_CELL_UP                           | 39 | 0.282 | 1.8548 | 0.0203 | 0.04  | 1 | 148 | tags=71%, list=43%, signal=121% |
| 579 | GSE12845_IGD_NEG_BLOOD_VS_DARKZONE_GC_TONSIL_BCELL_UP               | 28 | 0.321 | 1.8547 | 0.0037 | 0.04  | 1 | 417 | tags=74%, list=39%, signal=118% |
| 580 | GSE22886_NAIVE_CD4_TCELL_VS_12H_ACT_TH1_UP                          | 19 | 0.383 | 1.8525 | 0.0165 | 0.041 | 1 | 379 | tags=58%, list=25%, signal=76%  |
| 581 | GSE25085_FETAL_LIVER_VS_FETAL_BM_SP4_THYMIC_IMPLANT_DN              | 19 | 0.385 | 1.8524 | 0.0131 | 0.041 | 1 | 246 | tags=74%, list=39%, signal=118% |
| 582 | GSE2706_2H_VS_8H_R848_AND_LP_S_STIM_DC_DN                           | 19 | 0.371 | 1.852  | 0.0184 | 0.041 | 1 | 380 | tags=92%, list=56%, signal=203% |
| 583 | GSE5679_RARA_AGONIST_AM580_VS_AM580_AND_ROSIGLITAZONE_TREATED_DC_DN | 24 | 0.346 | 1.8498 | 0.0206 | 0.041 | 1 | 546 | tags=69%, list=39%, signal=110% |
| 584 | GSE6269_HEALTHY_VS_FLU_INF_PBMDC_DN                                 | 26 | 0.335 | 1.8486 | 0.0072 | 0.041 | 1 | 375 |                                 |

|     |                                                                                 |    |       |        |        |       |   |     |                                       |
|-----|---------------------------------------------------------------------------------|----|-------|--------|--------|-------|---|-----|---------------------------------------|
| 585 | GSE36476_CTRL_VS_TSST_ACT_16<br>H_MEMORY_CD4_TCELL_OLD_UP                       | 25 | 0.334 | 1.8483 | 0.0149 | 0.041 | 1 | 308 | tags=64%,<br>list=32%,<br>signal=91%  |
| 586 | GSE24142_EARLY_THYMIC_PROG<br>ENITOR_VS_DN2_THYMOCYTE_F<br>ETAL_UP              | 27 | 0.324 | 1.8473 | 0.0039 | 0.041 | 1 | 395 | tags=70%,<br>list=41%,<br>signal=115% |
| 587 | GSE41867_NAIVE_VS_DAY30_LCM<br>V_CLONE13_EXHAUSTED_CD8_T<br>CELL_UP             | 25 | 0.339 | 1.8462 | 0.0132 | 0.042 | 1 | 254 | tags=52%,<br>list=26%,<br>signal=69%  |
| 588 | GSE14908_RESTING_VS_HDM_STI<br>M_CD4_TCELL_NONATOPIC_PATI<br>ENT_DN             | 17 | 0.391 | 1.8453 | 0.0133 | 0.042 | 1 | 196 | tags=53%,<br>list=20%,<br>signal=65%  |
| 589 | KAECH_DAY8_EFF_VS_DAY15_EF<br>F_CD8_TCELL_DN                                    | 24 | 0.344 | 1.8438 | 0.0074 | 0.042 | 1 | 311 | tags=63%,<br>list=32%,<br>signal=90%  |
| 590 | GSE22589_SIV_VS_HIV_AND_SIV_<br>INFECTED_DC_UP                                  | 26 | 0.329 | 1.8436 | 0.0135 | 0.042 | 1 | 512 | tags=85%,<br>list=53%,<br>signal=174% |
| 591 | GSE21670_IL6_VS_TGFB_AND_IL6<br>_TREATED_CD4_TCELL_UP                           | 20 | 0.377 | 1.843  | 0.0093 | 0.042 | 1 | 357 | tags=70%,<br>list=37%,<br>signal=108% |
| 592 | GSE25123_CTRL_VS_ROSIGLITAZ<br>ONE_STIM_PPARG_KO_MACROPH<br>AGE_UP              | 26 | 0.33  | 1.8415 | 0.0076 | 0.042 | 1 | 578 | tags=92%,<br>list=59%,<br>signal=221% |
| 593 | GSE11057_CD4_EFF_MEM_VS_PB<br>MC_UP                                             | 22 | 0.357 | 1.839  | 0.0112 | 0.043 | 1 | 312 | tags=64%,<br>list=32%,<br>signal=92%  |
| 594 | GSE3982_MAST_CELL_VS_DC_DN                                                      | 23 | 0.347 | 1.8363 | 0.0198 | 0.043 | 1 | 198 | tags=48%,<br>list=20%,<br>signal=59%  |
| 595 | GSE23114_PERITONEAL_CAVITY_<br>B1A_BCELL_VS_SPLEEN_BCELL_I<br>N_SLE2C1_MOUSE_UP | 20 | 0.373 | 1.8351 | 0.019  | 0.044 | 1 | 464 | tags=85%,<br>list=48%,<br>signal=159% |
| 596 | GSE3920_UNTREATED_VS_IFNA_T<br>REATED_ENDOTHELIAL_CELL_U<br>P                   | 25 | 0.334 | 1.834  | 0.0188 | 0.044 | 1 | 130 | tags=40%,<br>list=13%,<br>signal=45%  |
| 597 | GSE14699_NAIVE_VS_ACT_CD8_T<br>CELL_UP                                          | 16 | 0.403 | 1.8332 | 0.0215 | 0.044 | 1 | 206 | tags=56%,<br>list=21%,<br>signal=70%  |
| 598 | GSE41867_MEMORY_VS_EXHAUS<br>TED_CD8_TCELL_DAY30_LCMV_<br>UP                    | 29 | 0.309 | 1.833  | 0.0093 | 0.044 | 1 | 397 | tags=69%,<br>list=41%,<br>signal=113% |
| 599 | GSE360_DC_VS_MAC_DN                                                             | 19 | 0.377 | 1.8299 | 0.0129 | 0.045 | 1 | 276 | tags=63%,<br>list=28%,<br>signal=86%  |
| 600 | GSE44649_WT_VS_MIR155_KO_AC<br>TIVATED_CD8_TCELL_UP                             | 25 | 0.332 | 1.8277 | 0.0152 | 0.045 | 1 | 512 | tags=84%,<br>list=53%,<br>signal=173% |
| 601 | GSE7460_FOXP3_MUT_VS_HET_A<br>CT_TCONV_UP                                       | 18 | 0.391 | 1.827  | 0.015  | 0.045 | 1 | 176 | tags=50%,<br>list=18%,<br>signal=60%  |
| 602 | GSE17721_LPS_VS_CPG_1H_BMDC<br>_DN                                              | 16 | 0.403 | 1.827  | 0.0109 | 0.045 | 1 | 463 | tags=88%,<br>list=48%,<br>signal=164% |
| 603 | GSE43955_TH0_VS_TGFB_IL6_TH1<br>7_ACT_CD4_TCELL_42H_DN                          | 17 | 0.398 | 1.8239 | 0.0124 | 0.046 | 1 | 303 | tags=65%,<br>list=31%,<br>signal=92%  |
| 604 | GSE22282_HYPOXIA_VS_NORMOX<br>IA_MYELOID_DC_DN                                  | 15 | 0.425 | 1.8224 | 0.0161 | 0.046 | 1 | 170 | tags=53%,<br>list=17%,<br>signal=64%  |

|     |                                                           |    |       |        |        |       |   |     |                                 |
|-----|-----------------------------------------------------------|----|-------|--------|--------|-------|---|-----|---------------------------------|
| 605 | GSE10273_HIGH_VS_LOW_IL7_TREATED_IRF4_8_NULL_PRE_BCELL_DN | 24 | 0.336 | 1.8188 | 0.0165 | 0.047 | 1 | 465 | tags=79%, list=48%, signal=148% |
| 606 | GSE20715_0H_VS_6H_OZONE_LUNG_UP                           | 26 | 0.32  | 1.8151 | 0.0129 | 0.048 | 1 | 456 | tags=77%, list=47%, signal=141% |
| 607 | GSE24292_WT_VS_PPARG_KO_MACROPHAGE_DN                     | 26 | 0.328 | 1.8145 | 0.0158 | 0.048 | 1 | 310 | tags=62%, list=32%, signal=88%  |
| 608 | GSE14350_IL2RB_KO_VS_WT_TREG_UP                           | 17 | 0.397 | 1.8132 | 0.0126 | 0.048 | 1 | 420 | tags=82%, list=43%, signal=142% |
| 609 | GSE3920_IFNA_VS_IFNG_TREATED_FIBROBLAST_UP                | 25 | 0.326 | 1.8127 | 0.0152 | 0.048 | 1 | 578 | tags=92%, list=59%, signal=220% |
| 610 | GSE17580_UNINFECTED_VS_S_MANSONI_INF_TREG_UP              | 21 | 0.364 | 1.8112 | 0.0162 | 0.049 | 1 | 235 | tags=57%, list=24%, signal=74%  |
| 611 | GSE17580_UNINFECTED_VS_S_MANSONI_INF_TEFF_UP              | 21 | 0.354 | 1.8086 | 0.0244 | 0.049 | 1 | 321 | tags=67%, list=33%, signal=97%  |
| 612 | GSE22589_HEALTHY_VS_HIV_INFECTED_DC_DN                    | 20 | 0.37  | 1.8082 | 0.017  | 0.049 | 1 | 215 | tags=55%, list=22%, signal=69%  |

| Negative DEGs enrichment results in the C7 |                                                         |      |       |        |           |           |            |             |                                 |
|--------------------------------------------|---------------------------------------------------------|------|-------|--------|-----------|-----------|------------|-------------|---------------------------------|
| follow link to MSigDB                      |                                                         |      |       |        |           |           |            |             |                                 |
|                                            |                                                         | SIZE | ES    | NES    | NOM p-val | FDR q-val | FWER p-val | RANK AT MAX | LEADING EDGE                    |
| 1                                          | GSE36476_CTRL_VS_TSST_ACT_72H_MEMORY_CD4_TCELL_YOUNG_DN | 44   | 0.608 | -4.565 | 0         | 0         | 0          | 290         | tags=86%, list=30%, signal=117% |
| 2                                          | GSE36476_CTRL_VS_TSST_ACT_72H_MEMORY_CD4_TCELL_OLD_DN   | 48   | 0.602 | -4.561 | 0         | 0         | 0          | 290         | tags=85%, list=30%, signal=116% |
| 3                                          | GSE36476_CTRL_VS_TSST_ACT_40H_MEMORY_CD4_TCELL_OLD_DN   | 46   | 0.593 | -4.498 | 0         | 0         | 0          | 290         | tags=85%, list=30%, signal=115% |
| 4                                          | GSE15750_DAY6_VS_DAY10_TRAF6KO_EFF_CD8_TCELL_UP         | 41   | 0.646 | -4.486 | 0         | 0         | 0          | 287         | tags=90%, list=29%, signal=123% |
| 5                                          | GSE15750_DAY6_VS_DAY10_EFF_CD8_TCELL_UP                 | 45   | 0.594 | -4.452 | 0         | 0         | 0          | 287         | tags=84%, list=29%, signal=114% |
| 6                                          | GSE39556_CD8A_DC_VS_NK_CELL_MOUSE_3H_POST_POLYIC_INJ_UP | 52   | 0.564 | -4.378 | 0         | 0         | 0          | 407         | tags=96%, list=42%, signal=156% |
| 7                                          | GSE25088_WT_VS_STAT6_KO_MACROPHAGE_IL4_STIM_DN          | 46   | 0.575 | -4.276 | 0         | 0         | 0          | 301         | tags=87%, list=31%, signal=120% |
| 8                                          | GSE13547_CTRL_VS_ANTI_IGM_STIM_BCELL_12H_UP             | 43   | 0.566 | -4.132 | 0         | 0         | 0          | 276         | tags=81%, list=28%, signal=109% |
| 9                                          | GSE33292_WT_VS_TCF1_KO_DN3_THYMOCYTE_DN                 | 45   | 0.548 | -4.036 | 0         | 0         | 0          | 407         | tags=93%, list=42%, signal=153% |
| 10                                         | GSE24634_TEFF_VS_TCONV_DAYS5_IN CULTURE UP              | 36   | 0.582 | -3.913 | 0         | 0         | 0          | 383         | tags=94%, list=39%, signal=150% |

|    |                                                                    |    |   |       |        |   |   |   |     |                                       |
|----|--------------------------------------------------------------------|----|---|-------|--------|---|---|---|-----|---------------------------------------|
| 11 | GSE22886_UNSTIM_VS_IL15_STIM_NKCELL_DN                             | 38 | - | 0.567 | -3.91  | 0 | 0 | 0 | 207 | tags=74%,<br>list=21%,<br>signal=90%  |
| 12 | GSE20715_0H_VS_48H_OZONE_LUNG_DN                                   | 32 | - | 0.612 | -3.887 | 0 | 0 | 0 | 312 | tags=91%,<br>list=32%,<br>signal=129% |
| 13 | GSE37532_WT_VS_PPARG_KO_VISCERAL_ADIPOSE_TISSUE_TREG_UP            | 35 | - | 0.591 | -3.886 | 0 | 0 | 0 | 344 | tags=91%,<br>list=35%,<br>signal=136% |
| 14 | GSE36476_CTRL_VS_TSST_ACT_40H_MEMORY_CD4_TCELL_YOUNG_DN            | 48 | - | 0.522 | -3.88  | 0 | 0 | 0 | 290 | tags=77%,<br>list=30%,<br>signal=104% |
| 15 | GSE3982_MEMORY_CD4_TCELL_VS_TH2_DN                                 | 36 | - | 0.575 | -3.864 | 0 | 0 | 0 | 270 | tags=81%,<br>list=28%,<br>signal=107% |
| 16 | GSE35543_IN_VITRO_ITREG_VS_CONVERTED_EX_ITREG_UP                   | 38 | - | 0.562 | -3.856 | 0 | 0 | 0 | 344 | tags=89%,<br>list=35%,<br>signal=133% |
| 17 | GSE25088_WT_VS_STAT6_KO_MACROPHAGE_DN                              | 46 | - | 0.508 | -3.789 | 0 | 0 | 0 | 290 | tags=78%,<br>list=30%,<br>signal=106% |
| 18 | GSE30962_PRIMARY_VS_SECONDARY_ACUTE_LCMV_INF_CD8_TCELL_UP          | 34 | - | 0.583 | -3.721 | 0 | 0 | 0 | 279 | tags=82%,<br>list=29%,<br>signal=111% |
| 19 | GSE7460_CD8_TCELL_VS_TREG_ACT_DN                                   | 24 | - | 0.647 | -3.658 | 0 | 0 | 0 | 286 | tags=92%,<br>list=29%,<br>signal=127% |
| 20 | GSE18893_TCONV_VS_TREG_24HTNF_STIM_UP                              | 28 | - | 0.608 | -3.656 | 0 | 0 | 0 | 275 | tags=86%,<br>list=28%,<br>signal=116% |
| 21 | GSE21063_WT_VS_NFATC1_KO_8H_ANTI_IGM_STIM_BCELL_UP                 | 39 | - | 0.532 | -3.626 | 0 | 0 | 0 | 290 | tags=79%,<br>list=30%,<br>signal=109% |
| 22 | GSE12845_IGD_POS_BLOOD_VS_PRE_GC_TONSIL_BCELL_DN                   | 42 | - | 0.504 | -3.589 | 0 | 0 | 0 | 289 | tags=76%,<br>list=30%,<br>signal=104% |
| 23 | GSE22886_UNSTIM_VS_IL2_STIM_NKCELL_DN                              | 37 | - | 0.517 | -3.573 | 0 | 0 | 0 | 179 | tags=65%,<br>list=18%,<br>signal=76%  |
| 24 | GSE14415_NATURAL_TREG_VS_TCONV_DN                                  | 43 | - | 0.488 | -3.559 | 0 | 0 | 0 | 276 | tags=74%,<br>list=28%,<br>signal=99%  |
| 25 | GSE1460_INTRATHYMIC_T_PROGENITOR_VS_NAIVE_CD4_TCELL_ADULT_BLOOD_UP | 33 | - | 0.546 | -3.537 | 0 | 0 | 0 | 408 | tags=94%,<br>list=42%,<br>signal=156% |
| 26 | GSE24634_TREG_VS_TCONV_POST_DAY7_IL4_CONVERSION_UP                 | 52 | - | 0.449 | -3.533 | 0 | 0 | 0 | 290 | tags=71%,<br>list=30%,<br>signal=96%  |
| 27 | GSE40274_CTRL_VS_FOXP3_TRANSDUCED_ACTIVATED_CD4_TCELL_UP           | 33 | - | 0.556 | -3.52  | 0 | 0 | 0 | 370 | tags=91%,<br>list=38%,<br>signal=142% |
| 28 | GSE45365_HEALTHY_VS_MCMV_INFECTIION_CD11B_DC_DN                    | 28 | - | 0.591 | -3.48  | 0 | 0 | 0 | 287 | tags=86%,<br>list=29%,<br>signal=118% |
| 29 | GSE24574_BCL6_LOW_TFH_VS_TCONV_CD4_TCELL_DN                        | 36 | - | 0.515 | -3.403 | 0 | 0 | 0 | 290 | tags=78%,<br>list=30%,<br>signal=107% |
| 30 | GSE29614_CTRL_VS_TIV_FLU_VACCINE_PBMC_2007_DN                      | 26 | - | 0.589 | -3.373 | 0 | 0 | 0 | 290 | tags=88%,<br>list=30%,<br>signal=123% |



|    |                                                                     |    |   |       |        |   |           |       |     |                                        |
|----|---------------------------------------------------------------------|----|---|-------|--------|---|-----------|-------|-----|----------------------------------------|
| 31 | GSE14415_TCONV_VS_FOXP3_KO_INDUCED_TREG_DN                          | 40 | - | 0.464 | -3.353 | 0 | 0         | 0     | 279 | tags=73%,<br>list=29%,<br>signal=97%   |
| 32 | GSE15930_NAIVE_VS_48H_IN_VIT_RO_STIM_CD8_TCELL_DN                   | 18 | - | 0.669 | -3.351 | 0 | 0         | 0     | 335 | tags=100%,<br>list=34%,<br>signal=150% |
| 33 | GSE29614_CTRL_VS_DAY7_TIV_FLU_VACCINE_PBMC_DN                       | 41 | - | 0.459 | -3.315 | 0 | 0         | 0     | 290 | tags=76%,<br>list=30%,<br>signal=103%  |
| 34 | GSE3982_NKCELL_VS_TH1_DN                                            | 31 | - | 0.535 | -3.313 | 0 | 0         | 0     | 287 | tags=81%,<br>list=29%,<br>signal=111%  |
| 35 | GSE15930_NAIVE_VS_72H_IN_VIT_RO_STIM_IFNAB_CD8_TCELL_DN             | 36 | - | 0.497 | -3.31  | 0 | 0         | 0     | 224 | tags=69%,<br>list=23%,<br>signal=87%   |
| 36 | GSE14415_INDUCED_VS_NATURAL_TREG_DN                                 | 39 | - | 0.482 | -3.288 | 0 | 0         | 0     | 354 | tags=82%,<br>list=36%,<br>signal=124%  |
| 37 | GSE12366_GC_VS_MEMORY_BCELL_UP                                      | 34 | - | 0.512 | -3.279 | 0 | 0         | 0     | 275 | tags=76%,<br>list=28%,<br>signal=103%  |
| 38 | GSE28726_NAIVE_CD4_TCELL_VS_NAIVE_VA24NEG_NKTCELL_UP                | 48 | - | 0.425 | -3.268 | 0 | 0         | 0     | 300 | tags=69%,<br>list=31%,<br>signal=94%   |
| 39 | GOLDRATH_EFF_VS_MEMORY_CD8_TCELL_UP                                 | 60 | - | 0.391 | -3.236 | 0 | 0         | 0     | 290 | tags=65%,<br>list=30%,<br>signal=87%   |
| 40 | GSE45365_WT_VS_IFNAR_KO_CD11B_DC_MCMV_INFECTION_DN                  | 22 | - | 0.598 | -3.23  | 0 | 0         | 0     | 287 | tags=86%,<br>list=29%,<br>signal=120%  |
| 41 | GSE15930_NAIVE_VS_24H_IN_VIT_RO_STIM_CD8_TCELL_DN                   | 34 | - | 0.486 | -3.219 | 0 | 0         | 0     | 360 | tags=82%,<br>list=37%,<br>signal=126%  |
| 42 | GSE10239_MEMORY_VS_KLRG1HIGH_EFF_CD8_TCELL_DN                       | 26 | - | 0.548 | -3.202 | 0 | 0         | 0     | 359 | tags=88%,<br>list=37%,<br>signal=136%  |
| 43 | GSE21670_UNTREATED_VS_TGFB_IL6_TREATED_CD4_TCELL_UP                 | 24 | - | 0.588 | -3.182 | 0 | 0         | 0     | 340 | tags=92%,<br>list=35%,<br>signal=137%  |
| 44 | GSE21063_CTRL_VS_ANTI_IGM_STIM_BCELL_NFATC1_KO_8H_DN                | 23 | - | 0.562 | -3.17  | 0 | 0         | 0     | 290 | tags=83%,<br>list=30%,<br>signal=115%  |
| 45 | GSE7764_IL15_TREATED_VS_CTRL_NK_CELL_24H_UP                         | 25 | - | 0.566 | -3.165 | 0 | 0         | 0     | 301 | tags=84%,<br>list=31%,<br>signal=118%  |
| 46 | GSE27241_WT_VS_RORGT_KO_TH17_POLARIZED_CD4_TCELL_UP                 | 28 | - | 0.518 | -3.106 | 0 | 0         | 0     | 386 | tags=89%,<br>list=40%,<br>signal=144%  |
| 47 | GSE13547_2H_VS_12_H_ANTI_IGM_STIM_BCELL_UP                          | 38 | - | -0.45 | -3.081 | 0 | 0         | 0     | 271 | tags=68%,<br>list=28%,<br>signal=91%   |
| 48 | GSE36826_WT_VS_IL1R_KO_SKIN_STAPH_AUREUS_INF_UP                     | 35 | - | 0.463 | -3.078 | 0 | 0         | 0     | 301 | tags=74%,<br>list=31%,<br>signal=104%  |
| 49 | GSE45365_WT_VS_IFNAR_KO_BCELL_MCMV_INFECTION_DN                     | 18 | - | 0.626 | -3.05  | 0 | ####<br># | 0.001 | 279 | tags=89%,<br>list=29%,<br>signal=122%  |
| 50 | GSE32164_ALTERNATIVELY_ACTIVATED_M2_VS_CMYC_INHIBITED_MACROPHAGE_DN | 37 | - | -0.45 | -3.024 | 0 | ####<br># | 0.002 | 305 | tags=73%,<br>list=31%,<br>signal=102%  |

|    |                                                                          |    |   |       |        |   |           |       |     |                                        |
|----|--------------------------------------------------------------------------|----|---|-------|--------|---|-----------|-------|-----|----------------------------------------|
| 51 | GSE7218_UNSTIM_VS_ANTIGEN_S<br>TIM_THROUGH_IGG_BCELL_UP                  | 18 | - | 0.597 | -3.022 | 0 | ####<br># | 0.002 | 262 | tags=83%,<br>list=27%,<br>signal=112%  |
| 52 | GSE28237_FOLLICULAR_VS_EARL<br>Y_GC_BCELL_DN                             | 21 | - | 0.565 | -3.009 | 0 | ####<br># | 0.002 | 356 | tags=90%,<br>list=37%,<br>signal=140%  |
| 53 | GSE20715_0H_VS_48H_OZONE_TL<br>R4_KO_LUNG_DN                             | 21 | - | 0.574 | -3.007 | 0 | ####<br># | 0.002 | 300 | tags=86%,<br>list=31%,<br>signal=121%  |
| 54 | GSE12366_GC_VS_NAIVE_BCELL_<br>UP                                        | 36 | - | 0.451 | -2.994 | 0 | ####<br># | 0.002 | 290 | tags=72%,<br>list=30%,<br>signal=99%   |
| 55 | GSE21546_UNSTIM_VS_ANTI_CD3<br>_STIM_DP_THYMOCYTES_DN                    | 17 | - | 0.633 | -2.987 | 0 | ####<br># | 0.002 | 369 | tags=100%,<br>list=38%,<br>signal=158% |
| 56 | GSE39110_DAY3_VS_DAY6_POST_<br>IMMUNIZATION_CD8_TCELL_DN                 | 38 | - | -0.44 | -2.984 | 0 | ####<br># | 0.002 | 277 | tags=78%,<br>list=28%,<br>signal=92%   |
| 57 | GSE45365_HEALTHY_VS_MCMV_I<br>NFECTION_CD11B_DC_IFNAR_KO<br>_DN          | 23 | - | 0.539 | -2.982 | 0 | ####<br># | 0.002 | 276 | tags=107%,<br>list=28%,<br>signal=107% |
| 58 | GSE15930_NAIVE_VS_24H_IN_VIT<br>RO_STIM_INFAB_CD8_TCELL_DN               | 34 | - | 0.449 | -2.972 | 0 | ####<br># | 0.002 | 360 | tags=79%,<br>list=37%,<br>signal=122%  |
| 59 | GSE10239_NAIVE_VS_DAY4.5_EFF<br>_CD8_TCELL_DN                            | 36 | - | -0.43 | -2.943 | 0 | ####<br># | 0.002 | 356 | tags=78%,<br>list=37%,<br>signal=118%  |
| 60 | GSE21546_WT_VS_ELK1_KO_ANTI<br>_CD3_STIM_DP_THYMOCYTES_D<br>N            | 25 | - | 0.516 | -2.939 | 0 | ####<br># | 0.002 | 377 | tags=88%,<br>list=39%,<br>signal=140%  |
| 61 | GSE5679_CTRL_VS_RARA_AGONI<br>ST_AM580_TREATED_DC_UP                     | 33 | - | 0.451 | -2.93  | 0 | ####<br># | 0.002 | 290 | tags=73%,<br>list=30%,<br>signal=100%  |
| 62 | GSE17974_CTRL_VS_ACT_IL4_AN<br>D_ANTI_IL12_24H_CD4_TCELL_D<br>N          | 25 | - | 0.508 | -2.928 | 0 | ####<br># | 0.003 | 369 | tags=88%,<br>list=38%,<br>signal=138%  |
| 63 | GSE13547_2H_VS_12_H_ANTI_IGM<br>_STIM_BCELL_DN                           | 30 | - | 0.461 | -2.916 | 0 | ####<br># | 0.003 | 237 | tags=67%,<br>list=24%,<br>signal=85%   |
| 64 | GSE40274_FOXP3_VS_FOXP3_AND<br>_EOS_TRANSDUCE_ACTIVATED<br>_CD4_TCELL_DN | 26 | - | 0.515 | -2.916 | 0 | ####<br># | 0.003 | 277 | tags=77%,<br>list=28%,<br>signal=105%  |
| 65 | GSE14415_INDUCED_TREG_VS_TC<br>ONV_UP                                    | 27 | - | 0.481 | -2.901 | 0 | ####<br># | 0.006 | 344 | tags=81%,<br>list=35%,<br>signal=122%  |
| 66 | GSE21063_CTRL_VS_ANTI_IGM_S<br>TIM_BCELL_16H_UP                          | 27 | - | 0.476 | -2.888 | 0 | ####<br># | 0.006 | 365 | tags=81%,<br>list=37%,<br>signal=127%  |
| 67 | GSE20727_CTRL_VS_ROS_INH_AN<br>D_DNFB_ALLERGEN_TREATED_D<br>C_DN         | 18 | - | 0.586 | -2.885 | 0 | ####<br># | 0.006 | 209 | tags=78%,<br>list=21%,<br>signal=97%   |
| 68 | GSE24634_TEFF_VS_TCONV_DAY7<br>_IN_CULTURE_UP                            | 55 | - | 0.354 | -2.86  | 0 | ####<br># | 0.008 | 239 | tags=55%,<br>list=25%,<br>signal=68%   |
| 69 | GSE3982_CENT_MEMORY_CD4_T<br>CELL_VS_TH2_DN                              | 33 | - | 0.441 | -2.848 | 0 | ####<br># | 0.01  | 365 | tags=79%,<br>list=37%,<br>signal=122%  |
| 70 | GSE33162_UNTREATED_VS_4H_LP<br>S_STIM_HDAC3_KO_MACROPHAG<br>E_DN         | 31 | - | 0.445 | -2.836 | 0 | ####<br># | 0.01  | 354 | tags=77%,<br>list=36%,<br>signal=118%  |

|    |                                                                           |    |   |       |        |   |           |       |     |                                       |
|----|---------------------------------------------------------------------------|----|---|-------|--------|---|-----------|-------|-----|---------------------------------------|
| 71 | GSE3982_CENT_MEMORY_CD4_T<br>CELL_VS_TH1_DN                               | 41 | - | 0.397 | -2.83  | 0 | ####<br># | 0.01  | 365 | tags=76%,<br>list=37%,<br>signal=116% |
| 72 | GSE10239_NAIVE_VS_KLRG1HIGH<br>_EFF_CD8_TCELL_DN                          | 35 | - | 0.433 | -2.829 | 0 | ####<br># | 0.01  | 328 | tags=74%,<br>list=34%,<br>signal=108% |
| 73 | GSE3982_MEMORY_CD4_TCELL_V<br>S_TH1_DN                                    | 33 | - | 0.432 | -2.828 | 0 | ####<br># | 0.01  | 270 | tags=67%,<br>list=28%,<br>signal=89%  |
| 74 | GSE3982_EFF_MEMORY_CD4_TCE<br>LL_VS_TH2_DN                                | 27 | - | 0.486 | -2.817 | 0 | ####<br># | 0.011 | 290 | tags=74%,<br>list=30%,<br>signal=103% |
| 75 | GSE11386_NAIVE_VS_MEMORY_B<br>CELL_UP                                     | 30 | - | 0.457 | -2.816 | 0 | ####<br># | 0.011 | 271 | tags=70%,<br>list=28%,<br>signal=94%  |
| 76 | GSE21546_ELK1_KO_VS_SAPIA_K<br>O_AND_ELK1_KO_DP_THYMOCY<br>TES_DN         | 17 | - | 0.581 | -2.813 | 0 | ####<br># | 0.011 | 272 | tags=82%,<br>list=28%,<br>signal=112% |
| 77 | GSE22886_NAIVE_CD4_TCELL_VS<br>_48H_ACT_TH2_DN                            | 27 | - | 0.474 | -2.807 | 0 | ####<br># | 0.015 | 359 | tags=81%,<br>list=37%,<br>signal=125% |
| 78 | GSE2770_UNTREATED_VS_IL4_TR<br>EATED_ACT_CD4_TCELL_48H_DN                 | 25 | - | 0.504 | -2.801 | 0 | ####<br># | 0.017 | 277 | tags=76%,<br>list=28%,<br>signal=103% |
| 79 | GSE2405_S_AUREUS_VS_UNTREA<br>TED_NEUTROPHIL_DN                           | 40 | - | 0.394 | -2.79  | 0 | ####<br># | 0.021 | 301 | tags=68%,<br>list=31%,<br>signal=94%  |
| 80 | GSE10239_MEMORY_VS_KLRG1IN<br>T_EFF_CD8_TCELL_DN                          | 28 | - | 0.453 | -2.788 | 0 | ####<br># | 0.021 | 404 | tags=86%,<br>list=41%,<br>signal=142% |
| 81 | GSE14415_INDUCED_TREG_VS_FA<br>ILED_INDUCED_TREG_UP                       | 27 | - | 0.461 | -2.786 | 0 | ####<br># | 0.021 | 286 | tags=70%,<br>list=29%,<br>signal=97%  |
| 82 | GSE32986_UNSTIM_VS_GMCSF_A<br>ND_CURDLAN_HIGHDOSE_STIM_<br>DC_UP          | 30 | - | -0.45 | -2.784 | 0 | ####<br># | 0.022 | 354 | tags=80%,<br>list=36%,<br>signal=122% |
| 83 | GSE10239_MEMORY_VS_DAY4.5_<br>EFF_CD8_TCELL_DN                            | 24 | - | 0.497 | -2.78  | 0 | ####<br># | 0.023 | 312 | tags=79%,<br>list=32%,<br>signal=114% |
| 84 | GSE13411_PLASMA_CELL_VS_ME<br>MORY_BCELL_UP                               | 29 | - | 0.453 | -2.756 | 0 | ####<br># | 0.028 | 290 | tags=72%,<br>list=30%,<br>signal=100% |
| 85 | GSE22601_DOUBLE_POSITIVE_VS<br>_CD4_SINGLE_POSITIVE_THYMO<br>CYTE_DN      | 26 | - | 0.465 | -2.732 | 0 | ####<br># | 0.036 | 279 | tags=73%,<br>list=29%,<br>signal=100% |
| 86 | GSE1460_INTRATHYMIC_T_PROG<br>ENITOR_VS_NAIVE_CD4_TCELL_<br>CORD_BLOOD_UP | 31 | - | 0.428 | -2.726 | 0 | ####<br># | 0.038 | 390 | tags=81%,<br>list=40%,<br>signal=130% |
| 87 | GSE21670_IL6_VS_TGFB_AND_IL6<br>_TREATED_CD4_TCELL_DN                     | 24 | - | 0.477 | -2.686 | 0 | ####<br># | 0.051 | 192 | tags=63%,<br>list=20%,<br>signal=76%  |
| 88 | GSE16450_IMMATURE_VS_MATU<br>RE_NEURON_CELL_LINE_DN                       | 20 | - | -0.52 | -2.668 | 0 | ####<br># | 0.058 | 179 | tags=65%,<br>list=18%,<br>signal=78%  |
| 89 | GSE31082_DN_VS_CD8_SP_THYM<br>OCYTE_UP                                    | 17 | - | 0.568 | -2.667 | 0 | ####<br># | 0.058 | 236 | tags=76%,<br>list=24%,<br>signal=99%  |
| 90 | GSE12392_CD8A_POS_VS_NEG_SP<br>LEEN_DC_DN                                 | 31 | - | 0.424 | -2.664 | 0 | ####<br># | 0.061 | 328 | tags=74%,<br>list=34%,<br>signal=108% |

|     |                                                                               |    |   |       |        |        |           |       |     |                                                                               |
|-----|-------------------------------------------------------------------------------|----|---|-------|--------|--------|-----------|-------|-----|-------------------------------------------------------------------------------|
| 91  | GSE19888_CTRL_VS_A3R_INHIBIT<br>OR_TREATED_MAST_CELL_UP                       | 18 | - | 0.556 | -2.662 | 0      | ####<br># | 0.061 | 391 | tags=94%,<br>list=40%,<br>signal=155%<br>tags=70%,<br>list=30%,<br>signal=97% |
| 92  | GSE3982_NKCELL_VS_TH2_DN                                                      | 30 | - | 0.437 | -2.66  | 0      | ####<br># | 0.061 | 290 | tags=64%,<br>list=30%,<br>signal=87%                                          |
| 93  | GSE28726_NAIVE_VS_ACTIVATED<br>_CD4_TCELL_DN                                  | 44 | - | 0.356 | -2.659 | 0      | ####<br># | 0.061 | 290 | tags=79%,<br>list=37%,<br>signal=122%                                         |
| 94  | GSE3982_EFF_MEMORY_CD4_TCE<br>LL_VS_TH1_DN                                    | 28 | - | 0.439 | -2.647 | 0      | ####<br># | 0.065 | 365 | tags=61%,<br>list=29%,<br>signal=81%                                          |
| 95  | GSE13547_CTRL_VS_ANTI_IGM_S<br>TIM_BCELL_2H_UP                                | 46 | - | 0.364 | -2.64  | 0      | ####<br># | 0.073 | 279 | tags=73%,<br>list=29%,<br>signal=101%                                         |
| 96  | GSE7852_LN_VS_THYMUS_TCON<br>V_DN                                             | 26 | - | 0.454 | -2.633 | 0      | ####<br># | 0.077 | 287 | tags=75%,<br>list=23%,<br>signal=96%                                          |
| 97  | GSE14413_UNSTIM_VS_IFNB_STI<br>M_RAW264_CELLS_UP                              | 16 | - | 0.567 | -2.62  | 0      | ####<br># | 0.085 | 222 | tags=87%,<br>list=41%,<br>signal=145%                                         |
| 98  | GSE21063_WT_VS_NFATC1_KO_B<br>CELL_DN                                         | 23 | - | 0.478 | -2.616 | 0      | ####<br># | 0.087 | 404 | tags=80%,<br>list=36%,<br>signal=121%                                         |
| 99  | GSE24671_BAKIMULC_VS_SENDA<br>I_VIRUS_INFECTED_MOUSE_SPLE<br>NOCYTES_UP       | 25 | - | 0.476 | -2.606 | 0      | ####<br># | 0.096 | 348 | tags=75%,<br>list=23%,<br>signal=95%                                          |
| 100 | GSE16451_IMMATURE_VS_MATU<br>RE_NEURON_CELL_LINE_WEST_E<br>QUINE_ENC_VIRUS_UP | 16 | - | 0.562 | -2.601 | 0.0021 | ####<br># | 0.099 | 221 | tags=94%,<br>list=40%,<br>signal=154%                                         |
| 101 | GSE21360_SECONDARY_VS_TERTI<br>ARY_MEMORY_CD8_TCELL_UP                        | 16 | - | 0.553 | -2.6   | 0      | ####<br># | 0.099 | 392 | tags=71%,<br>list=34%,<br>signal=103%                                         |
| 102 | GSE23568_CTRL_VS_ID3_TRANSD<br>UCED_CD8_TCELL_DN                              | 34 | - | -0.39 | -2.6   | 0      | ####<br># | 0.101 | 328 | tags=78%,<br>list=29%,<br>signal=108%                                         |
| 103 | GSE15930_NAIVE_VS_48H_IN_VIT<br>RO_STIM_IFNAB_CD8_TCELL_DN                    | 18 | - | 0.519 | -2.597 | 0      | ####<br># | 0.104 | 285 | tags=94%,<br>list=40%,<br>signal=154%                                         |
| 104 | GSE22886_NAIVE_CD4_TCELL_VS<br>_48H_ACT_TH1_DN                                | 17 | - | 0.554 | -2.595 | 0      | ####<br># | 0.108 | 391 | tags=53%,<br>list=24%,<br>signal=66%                                          |
| 105 | GSE24634_IL4_VS_CTRL_TREATE<br>D_NAIVE_CD4_TCELL_DAY7_UP                      | 51 | - | 0.325 | -2.595 | 0      | ####<br># | 0.108 | 237 | tags=75%,<br>list=36%,<br>signal=114%                                         |
| 106 | GSE15930_NAIVE_VS_72H_IN_VIT<br>RO_STIM_CD8_TCELL_DN                          | 32 | - | -0.41 | -2.588 | 0      | ####<br># | 0.116 | 354 | tags=94%,<br>list=42%,<br>signal=159%                                         |
| 107 | GSE2770_IL12_AND_TGFB_VS_IL4<br>_TREATED_ACT_CD4_TCELL_6H<br>UP               | 17 | - | 0.532 | -2.58  | 0      | ####<br># | 0.119 | 407 | tags=86%,<br>list=40%,<br>signal=141%                                         |
| 108 | GSE24026_PD1_LIGATION_VS_CT<br>RL_IN_ACT_TCELL_LINE_DN                        | 22 | - | 0.471 | -2.578 | 0      | ####<br># | 0.12  | 390 | tags=94%,<br>list=42%,<br>signal=158%                                         |
| 109 | GSE3920_UNTREATED_VS_IFNG_T<br>REATED_ENDOTHELIAL_CELL_D<br>N                 | 17 | - | 0.543 | -2.573 | 0      | ####<br># | 0.122 | 405 | tags=80%,<br>list=31%,<br>signal=114%                                         |
| 110 | GSE7460_CTRL_VS_TGFB_TREATE<br>D_ACT_TREG_UP                                  | 20 | - | 0.491 | -2.556 | 0      | ####<br># | 0.131 | 304 |                                                                               |

|     |                                                                                   |    |   |       |        |        |           |       |     |                                       |
|-----|-----------------------------------------------------------------------------------|----|---|-------|--------|--------|-----------|-------|-----|---------------------------------------|
| 111 | GSE15930_NAIVE_VS_24H_IN_VIT<br>RO_STIM_IL12_CD8_TCELL_DN                         | 34 | - | 0.396 | -2.553 | 0      | ####<br># | 0.135 | 360 | tags=74%,<br>list=37%,<br>signal=113% |
| 112 | GSE5679_CTRL_VS_PPARG_LIGAN<br>D_ROSIGLITAZONE_TREATED_DC<br>_UP                  | 30 | - | -0.41 | -2.549 | 0      | ####<br># | 0.14  | 290 | tags=70%,<br>list=30%,<br>signal=97%  |
| 113 | GSE15930_NAIVE_VS_72H_IN_VIT<br>RO_STIM_IL12_CD8_TCELL_DN                         | 34 | - | 0.393 | -2.539 | 0      | 0.001     | 0.152 | 181 | tags=53%,<br>list=19%,<br>signal=63%  |
| 114 | GSE16451_CTRL_VS_WEST_EQUIN<br>E_ENC_VIRUS_IMMATURE_NEUR<br>ON_CELL_LINE_DN       | 24 | - | 0.447 | -2.485 | 0      | 0.002     | 0.219 | 277 | tags=71%,<br>list=28%,<br>signal=97%  |
| 115 | GSE17974_0.5H_VS_72H_IL4_AND<br>ANTI_IL12_ACT_CD4_TCELL_DN                        | 21 | - | 0.472 | -2.482 | 0      | 0.002     | 0.223 | 359 | tags=81%,<br>list=37%,<br>signal=125% |
| 116 | GSE15930_NAIVE_VS_72H_IN_VIT<br>RO_STIM_TRICHOSTATINA_CD8_<br>TCELL_DN            | 32 | - | 0.399 | -2.477 | 0      | 0.002     | 0.229 | 224 | tags=59%,<br>list=23%,<br>signal=75%  |
| 117 | GSE13547_WT_VS_ZFX_KO_BCEL<br>L_ANTI_IGM_STIM_2H_UP                               | 23 | - | 0.449 | -2.465 | 0      | 0.002     | 0.243 | 404 | tags=87%,<br>list=41%,<br>signal=145% |
| 118 | GSE15930_NAIVE_VS_48H_IN_VIT<br>RO_STIM_IL12_CD8_TCELL_DN                         | 20 | - | -0.49 | -2.464 | 0      | 0.002     | 0.243 | 283 | tags=75%,<br>list=29%,<br>signal=104% |
| 119 | GSE25085_FETAL_LIVER_VS_ADU<br>LT_BM_SP4_THYMIC_IMPLANT_D<br>N                    | 22 | - | 0.468 | -2.462 | 0      | 0.002     | 0.247 | 407 | tags=86%,<br>list=42%,<br>signal=145% |
| 120 | GSE17974_CTRL_VS_ACT_IL4_AN<br>D_ANTI_IL12_12H_CD4_TCELL_D<br>N                   | 15 | - | 0.545 | -2.447 | 0      | 0.002     | 0.27  | 270 | tags=80%,<br>list=28%,<br>signal=109% |
| 121 | GSE22886_NAIVE_CD4_TCELL_VS<br>_12H_ACT_TH1_DN                                    | 24 | - | 0.438 | -2.443 | 0      | 0.002     | 0.274 | 304 | tags=71%,<br>list=31%,<br>signal=100% |
| 122 | GSE24634_TEFF_VS_TCONV_DAY3<br>_IN_CULTURE_UP                                     | 25 | - | 0.422 | -2.431 | 0      | 0.002     | 0.298 | 290 | tags=68%,<br>list=30%,<br>signal=94%  |
| 123 | GSE17974_0H_VS_24H_IN_VITRO_<br>ACT_CD4_TCELL_DN                                  | 23 | - | 0.448 | -2.423 | 0      | 0.002     | 0.31  | 275 | tags=70%,<br>list=28%,<br>signal=95%  |
| 124 | GSE22601_CD4_SINGLE_POSITIVE<br>_VS_CD8_SINGLE_POSITIVE_THY<br>MOCYTE_UP          | 23 | - | 0.437 | -2.423 | 0      | 0.002     | 0.31  | 340 | tags=78%,<br>list=35%,<br>signal=117% |
| 125 | GSE7460_CTRL_VS_FOXP3_OVERE<br>XPR_TCONV_1_UP                                     | 17 | - | 0.491 | -2.419 | 0.0021 | 0.002     | 0.319 | 236 | tags=71%,<br>list=24%,<br>signal=92%  |
| 126 | GSE17721_POLYIC_VS_CPG_16H_B<br>MDC_DN                                            | 15 | - | 0.532 | -2.417 | 0      | 0.002     | 0.323 | 336 | tags=87%,<br>list=34%,<br>signal=130% |
| 127 | GSE13485_DAY1_VS_DAY21_YF17<br>D_VACCINE_PBMC_DN                                  | 16 | - | -0.52 | -2.404 | 0      | 0.002     | 0.351 | 401 | tags=94%,<br>list=41%,<br>signal=157% |
| 128 | GSE24634_NAIVE_CD4_TCELL_VS<br>_DAY7_IL4_CONV_TREG_DN                             | 37 | - | 0.355 | -2.396 | 0      | 0.003     | 0.365 | 286 | tags=62%,<br>list=29%,<br>signal=85%  |
| 129 | GSE43863_TH1_VS_LY6C_INT_CX<br>CR5POS_EFFECTOR_CD4_TCELL_<br>UP                   | 24 | - | -0.43 | -2.39  | 0      | 0.003     | 0.384 | 344 | tags=79%,<br>list=35%,<br>signal=119% |
| 130 | GSE10240_CTRL_VS_IL17_AND_IL<br>22_STIM_PRIMARY_BRONCHIAL_<br>EPITHELIAL_CELLS_UP | 20 | - | 0.472 | -2.387 | 0      | 0.003     | 0.397 | 301 | tags=75%,<br>list=31%,<br>signal=106% |

|     |                                                                               |    |   |       |        |        |       |       |     |                                 |
|-----|-------------------------------------------------------------------------------|----|---|-------|--------|--------|-------|-------|-----|---------------------------------|
| 131 | GSE27786_LIN_NEG_VS_CD8_TCELL_UP                                              | 28 | - | 0.399 | -2.385 | 0      | 0.003 | 0.399 | 176 | tags=54%, list=18%, signal=64%  |
| 132 | GSE14350_TREG_VS_TEFF_IN_IL2_RB_KO_DN                                         | 23 | - | 0.435 | -2.382 | 0      | 0.003 | 0.405 | 277 | tags=70%, list=28%, signal=95%  |
| 133 | GSE21670_UNTREATED_VS_TGFB_IL6_TREATED_STAT3_KO_CD4_TCELL_UP                  | 27 | - | 0.409 | -2.38  | 0      | 0.003 | 0.407 | 152 | tags=52%, list=16%, signal=60%  |
| 134 | GSE20727_CTRL_VS_ROS_INHIBITOR_TREATED_DC_UP                                  | 15 | - | 0.543 | -2.376 | 0      | 0.003 | 0.419 | 334 | tags=87%, list=34%, signal=130% |
| 135 | GSE21927_SPLEEN_C57BL6_VS_EL4_TUMOR_BALBC_MONOCYTES_DN                        | 16 | - | 0.519 | -2.373 | 0      | 0.003 | 0.426 | 306 | tags=81%, list=31%, signal=117% |
| 136 | GSE30962_ACUTE_VS_CHRONIC_LCMV_SECONDARY_INF_CD8_TCELL_DN                     | 35 | - | 0.359 | -2.371 | 0      | 0.003 | 0.431 | 290 | tags=60%, list=30%, signal=82%  |
| 137 | GSE17974_CTRL_VS_ACT_IL4_AND_ANTI_IL12_48H_CD4_TCELL_DN                       | 26 | - | 0.409 | -2.37  | 0      | 0.003 | 0.435 | 367 | tags=77%, list=38%, signal=120% |
| 138 | GSE45365_WT_VS_IFNAR_KO_BCELL_DN                                              | 23 | - | 0.421 | -2.363 | 0      | 0.003 | 0.453 | 287 | tags=70%, list=29%, signal=96%  |
| 139 | GSE360_L_DONOVANI_VS_T_GONDI_DC_DN                                            | 18 | - | 0.497 | -2.36  | 0.0021 | 0.003 | 0.463 | 169 | tags=61%, list=17%, signal=73%  |
| 140 | GSE8685_IL2_STARVED_VS_IL2_ACT_IL2_STARVED_CD4_TCELL_DN                       | 20 | - | 0.453 | -2.356 | 0      | 0.003 | 0.47  | 407 | tags=85%, list=42%, signal=143% |
| 141 | GSE14415_ACT_VS_CTRL_NATURAL_TREG_UP                                          | 22 | - | -0.44 | -2.352 | 0      | 0.003 | 0.484 | 286 | tags=73%, list=29%, signal=101% |
| 142 | GSE13547_2H_VS_12_H_ANTI_IGM_STIM_ZFX_KO_BCELL_DN                             | 32 | - | 0.372 | -2.348 | 0      | 0.003 | 0.492 | 276 | tags=66%, list=28%, signal=89%  |
| 143 | GSE1460_DP_THYMOCYTE_VS_NAIVE_CD4_TCELL_CORD_BLOOD_UP                         | 27 | - | 0.394 | -2.344 | 0      | 0.003 | 0.504 | 390 | tags=78%, list=40%, signal=126% |
| 144 | GSE37534_UNTREATED_VS_GW1929_TREATED_CD4_TCELL_PPARG_1_AND_FOXP3_TRASDUCED_DN | 30 | - | 0.377 | -2.339 | 0.0021 | 0.003 | 0.514 | 295 | tags=67%, list=30%, signal=93%  |
| 145 | GSE41176_WT_VS_TAK1_KO_ANTI_IGM_STIM_BCELL_24H_UP                             | 20 | - | 0.448 | -2.328 | 0      | 0.004 | 0.549 | 309 | tags=75%, list=32%, signal=108% |
| 146 | GSE2770_IL12_ACT_VS_ACT_CD4_TCELL_2H_DN                                       | 16 | - | 0.503 | -2.327 | 0      | 0.004 | 0.55  | 265 | tags=75%, list=27%, signal=101% |
| 147 | GSE27786_LIN_NEG_VS_NKTCELL_UP                                                | 25 | - | 0.414 | -2.326 | 0.0044 | 0.004 | 0.554 | 356 | tags=76%, list=37%, signal=117% |
| 148 | GSE32986_UNSTIM_VS_CURDLAN_HIGHDOSE_STIM_DC_UP                                | 20 | - | 0.447 | -2.322 | 0      | 0.004 | 0.565 | 355 | tags=80%, list=36%, signal=123% |
| 149 | GSE9878_CTRL_VS_EBF_TRANSDUCED_PAX5_KO_PRO_BCELL_DN                           | 27 | - | 0.395 | -2.317 | 0.0021 | 0.004 | 0.575 | 301 | tags=67%, list=31%, signal=94%  |
| 150 | GSE39556_UNTREATED_VS_3H_POLYIC_INJ_MOUSE_NK_CELL_UP                          | 43 | - | 0.316 | -2.31  | 0      | 0.004 | 0.592 | 178 | tags=44%, list=18%, signal=52%  |

|     |                                                                            |    |   |       |        |        |       |       |     |                                 |
|-----|----------------------------------------------------------------------------|----|---|-------|--------|--------|-------|-------|-----|---------------------------------|
| 151 | GSE40666_WT_VS_STAT1_KO_CD8_TCELL_WITH_IFNA_STIM_90MIN_DN                  | 36 | - | 0.337 | -2.281 | 0      | 0.005 | 0.658 | 277 | tags=58%, list=28%, signal=79%  |
| 152 | GSE24634_TREG_VS_TCONV_POST_DAY5_IL4_CONVERSION_UP                         | 19 | - | 0.457 | -2.277 | 0.0021 | 0.005 | 0.666 | 385 | tags=84%, list=40%, signal=137% |
| 153 | GSE17721_CTRL_VS_CPG_12H_BMDC_UP                                           | 16 | - | 0.485 | -2.272 | 0      | 0.005 | 0.682 | 279 | tags=75%, list=29%, signal=103% |
| 154 | GSE19941_UNSTIM_VS_LPS_AND_IL10_STIM_IL10_KO_MACROPHAGE_DN                 | 25 | - | 0.399 | -2.269 | 0      | 0.005 | 0.688 | 286 | tags=68%, list=29%, signal=94%  |
| 155 | GSE41087_WT_VS_FOXP3_MUT_ANTICD3_CD28_STIM_CD4_TCELL_DN                    | 30 | - | 0.362 | -2.269 | 0      | 0.005 | 0.688 | 346 | tags=70%, list=36%, signal=105% |
| 156 | GSE32164_RESTING_DIFFERENTIATED_VS_ALTERNATIVELY_ACTIVATED_MACROPHAGE_UP   | 35 | - | 0.344 | -2.268 | 0      | 0.005 | 0.695 | 279 | tags=60%, list=29%, signal=81%  |
| 157 | GSE2770_UNTREATED_VS_IL12_TREATED_ACT_CD4_TCELL_2H_DN                      | 15 | - | -0.5  | -2.265 | 0      | 0.005 | 0.703 | 369 | tags=87%, list=38%, signal=137% |
| 158 | GSE3982_NEUTROPHIL_VS_TH2_DN                                               | 17 | - | 0.484 | -2.264 | 0.0021 | 0.005 | 0.705 | 338 | tags=82%, list=35%, signal=124% |
| 159 | GSE3982_BASOPHIL_VS_TH1_DN                                                 | 21 | - | 0.431 | -2.261 | 0.0022 | 0.005 | 0.716 | 328 | tags=76%, list=34%, signal=112% |
| 160 | GSE19941_LPS_VS_LPS_AND_IL10_STIM_IL10_KO_MACROPHAGE_UP                    | 21 | - | 0.429 | -2.258 | 0.0043 | 0.006 | 0.725 | 346 | tags=76%, list=36%, signal=116% |
| 161 | GSE1460_DP_THYMOCYTE_VS_NAIVE_CD4_TCELL_ADULT_BLOOD_UP                     | 24 | - | 0.408 | -2.254 | 0.0043 | 0.006 | 0.738 | 173 | tags=54%, list=18%, signal=64%  |
| 162 | GSE24634_TREG_VS_TCONV_POST_DAY3_IL4_CONVERSION_UP                         | 26 | - | 0.379 | -2.253 | 0      | 0.006 | 0.738 | 352 | tags=73%, list=36%, signal=111% |
| 163 | GSE9988_ANTI_TREM1_VS_VEHICLE_TREATED_MONOCYTES_UP                         | 17 | - | 0.476 | -2.246 | 0      | 0.006 | 0.755 | 168 | tags=59%, list=17%, signal=70%  |
| 164 | GSE20366_EX_VIVO_VS_HOMEOSTATIC_CONVERSION_TREG_DN                         | 26 | - | 0.392 | -2.243 | 0.0046 | 0.006 | 0.762 | 328 | tags=69%, list=34%, signal=102% |
| 165 | GSE36826_NORMAL_VS_STAPH_AUREUS_INF_IL1R_KO_SKIN_UP                        | 30 | - | 0.365 | -2.238 | 0      | 0.006 | 0.777 | 231 | tags=57%, list=24%, signal=72%  |
| 166 | GSE22886_IGM_MEMORY_BCELL_VS_BLOOD_PLASMA_CELL_DN                          | 22 | - | 0.422 | -2.234 | 0      | 0.006 | 0.782 | 309 | tags=73%, list=32%, signal=104% |
| 167 | GSE3982_DC_VS_MAC_DN                                                       | 25 | - | 0.391 | -2.223 | 0      | 0.007 | 0.805 | 133 | tags=48%, list=14%, signal=54%  |
| 168 | GSE24634_NAIVE_CD4_TCELL_VS_DAY10_IL4_CONV_TREG_DN                         | 30 | - | 0.356 | -2.212 | 0      | 0.007 | 0.831 | 221 | tags=53%, list=23%, signal=67%  |
| 169 | GSE17301_IFNA2_VS_IFNA5_STIM_ACD3_ACD28_ACT_CD8_TCELL_DN                   | 27 | - | -0.37 | -2.208 | 0      | 0.008 | 0.836 | 338 | tags=70%, list=35%, signal=105% |
| 170 | GSE19941_IL10_KO_VS_IL10_KO_AND_NFKBP50_KO_LPS_AND_IL10_STIM_MACROPHAGE_DN | 26 | - | 0.386 | -2.206 | 0      | 0.008 | 0.837 | 356 | tags=73%, list=37%, signal=112% |

|     |                                                                         |    |   |       |        |        |       |       |     |                                       |
|-----|-------------------------------------------------------------------------|----|---|-------|--------|--------|-------|-------|-----|---------------------------------------|
| 171 | GSE21063_3H_VS_16H_ANTI_IGM_STIM_NFATC1_KOBCELL_DN                      | 17 | - | 0.463 | -2.199 | 0.0043 | 0.008 | 0.856 | 269 | tags=71%,<br>list=28%,<br>signal=96%  |
| 172 | GSE24574_BCL6_HIGH_VS_LOW_TFH_CD4_TCELL_DN                              | 34 | - | 0.334 | -2.188 | 0      | 0.008 | 0.867 | 277 | tags=59%,<br>list=28%,<br>signal=79%  |
| 173 | GSE1740_MCSF_VS_MCSF_AND_IFNG_DAY2_DERIVED_MACROPHAGE_WITH_IFNA_STIM_UP | 19 | - | 0.428 | -2.188 | 0      | 0.008 | 0.867 | 358 | tags=79%,<br>list=37%,<br>signal=122% |
| 174 | GSE22527_ANTI_CD3_INVIVO_VS_UNTREATED_MOUSE_TREG_DN                     | 19 | - | 0.429 | -2.179 | 0.0023 | 0.009 | 0.878 | 367 | tags=79%,<br>list=38%,<br>signal=124% |
| 175 | GSE7568_IL4_VS_IL4_AND_TGFB_TREATED_MACROPHAGE_24H_DN                   | 21 | - | 0.422 | -2.176 | 0      | 0.009 | 0.879 | 335 | tags=76%,<br>list=34%,<br>signal=114% |
| 176 | GSE18203_CTRL_VS_INTRATUMORAL_CPG_INJ_MC38_TUMOR_DN                     | 28 | - | 0.371 | -2.176 | 0      | 0.009 | 0.88  | 173 | tags=50%,<br>list=18%,<br>signal=59%  |
| 177 | GSE43863_TH1_VS_LY6C_LOW_CXCR5NEG_EFFECTOR_CD4_TCELL_UP                 | 15 | - | 0.484 | -2.169 | 0      | 0.009 | 0.895 | 271 | tags=73%,<br>list=28%,<br>signal=100% |
| 178 | GSE27859_DC_VS_CD11C_INT_F480_HI_MACROPHAGE_UP                          | 15 | - | 0.471 | -2.166 | 0      | 0.009 | 0.903 | 396 | tags=87%,<br>list=41%,<br>signal=144% |
| 179 | GSE32986_UNSTIM_VS_GMCSF_AND_CURDLAN_LOWDOSE_STIM_DC_UP                 | 19 | - | 0.434 | -2.142 | 0      | 0.011 | 0.928 | 187 | tags=58%,<br>list=19%,<br>signal=70%  |
| 180 | GSE411_WT_VS_SOCS3_KO_MACROPHAGE_UP                                     | 22 | - | 0.396 | -2.141 | 0.0023 | 0.011 | 0.928 | 333 | tags=73%,<br>list=34%,<br>signal=108% |
| 181 | GSE19198_CTRL_VS_IL21_TREATED_TCELL_1H_DN                               | 16 | - | 0.469 | -2.141 | 0.0045 | 0.011 | 0.928 | 145 | tags=56%,<br>list=15%,<br>signal=65%  |
| 182 | GSE21927_GMCSF_IL6_VS_GMCSF_GCSF_TREATED_BONE_MARROW_DN                 | 19 | - | 0.415 | -2.14  | 0.0043 | 0.011 | 0.928 | 323 | tags=74%,<br>list=33%,<br>signal=108% |
| 183 | GSE23568_ID3_KO_VS_WT_CD8_TCELL_UP                                      | 35 | - | 0.312 | -2.134 | 0      | 0.011 | 0.933 | 286 | tags=60%,<br>list=29%,<br>signal=82%  |
| 184 | GSE8685_IL2_STARVED_VS_IL21_ACT_IL2_STARVED_CD4_TCELL_UP                | 15 | - | 0.463 | -2.125 | 0.0041 | 0.012 | 0.943 | 178 | tags=60%,<br>list=18%,<br>signal=72%  |
| 185 | GSE9988_LOW_LPS_VS_ANTI_TREPM1_AND_LPS_MONOCYTE_DN                      | 21 | - | 0.407 | -2.116 | 0.0043 | 0.013 | 0.95  | 250 | tags=62%,<br>list=26%,<br>signal=81%  |
| 186 | GSE7768_OVA_ALONE_VS_OVA_WITH_MPL_IMMUNIZED_MOUSE_WHOLE_SPLEEN_6H_UP    | 17 | - | -0.44 | -2.108 | 0.0021 | 0.013 | 0.96  | 347 | tags=76%,<br>list=36%,<br>signal=117% |
| 187 | GSE22886_UNSTIM_VS_STIM_MEMORY_TCELL_DN                                 | 22 | - | -0.38 | -2.104 | 0      | 0.014 | 0.96  | 306 | tags=68%,<br>list=31%,<br>signal=97%  |
| 188 | GSE46606_IRF4_KO_VS_WT_CD40L_IL2_IL5_3DAY_STIMULATED_BCELL_UP           | 24 | - | 0.368 | -2.098 | 0.0067 | 0.014 | 0.964 | 144 | tags=46%,<br>list=15%,<br>signal=52%  |
| 189 | GSE31082_DP_VS_CD4_SP_THYMOCYTE_UP                                      | 16 | - | 0.446 | -2.082 | 0.0044 | 0.015 | 0.978 | 327 | tags=75%,<br>list=34%,<br>signal=111% |
| 190 | GSE19825_NAIVE_VS_DAY3_EFFECTOR_CD8_TCELL_DN                            | 17 | - | 0.433 | -2.082 | 0.0021 | 0.015 | 0.978 | 363 | tags=82%,<br>list=37%,<br>signal=129% |



|     |                                                                                |    |       |        |        |        |       |       |                                      |                                       |
|-----|--------------------------------------------------------------------------------|----|-------|--------|--------|--------|-------|-------|--------------------------------------|---------------------------------------|
| 191 | GSE39110_DAY3_VS_DAY6_POST<br>IMMUNIZATION_CD8_TCELL_WIT<br>H_IL2_TREATMENT_UP | 23 | -     | 0.375  | -2.082 | 0      | 0.015 | 0.978 | 246                                  | tags=61%,<br>list=25%,<br>signal=80%  |
| 192 | GSE17301_ACD3_ACD28_VS_ACD3<br>_ACD28_AND_IFNA2_STIM_CD8_T<br>CELL_UP          | 24 | -     | 0.379  | -2.075 | 0.0022 | 0.016 | 0.982 | 403                                  | tags=79%,<br>list=41%,<br>signal=132% |
| 193 | GSE27859_DC_VS_CD11C_INT_F48<br>0_INT_DC_DN                                    | 17 | -     | 0.429  | -2.074 | 0.0021 | 0.016 | 0.983 | 285                                  | tags=71%,<br>list=29%,<br>signal=98%  |
| 194 | GSE22589_HEALTHY_VS_HIV_AN<br>D_SIV_INFECTED_DC_UP                             | 15 | -     | 0.453  | -2.073 | 0      | 0.016 | 0.984 | 407                                  | tags=87%,<br>list=42%,<br>signal=147% |
| 195 | GSE12845_IGD_NEG_BLOOD_VS_P<br>RE_GC_TONSIL_BCELL_DN                           | 27 | -     | 0.355  | -2.073 | 0.0023 | 0.016 | 0.984 | 216                                  | tags=52%,<br>list=22%,<br>signal=65%  |
| 196 | GSE29164_UNTREATED_VS_CD8<br>TCELL_AND_IL12_TREATED_MEL<br>ANOMA_DAY3_DN       | 20 | -     | 0.397  | -2.072 | 0.0045 | 0.016 | 0.985 | 365                                  | tags=75%,<br>list=37%,<br>signal=117% |
| 197 | GSE17186_CD21LOW_VS_CD21HIG<br>H_TRANSITIONAL_BCELL_DN                         | 21 | -0.39 | -2.069 | 0      | 0.016  | 0.985 | 268   | tags=62%,<br>list=28%,<br>signal=84% |                                       |
| 198 | GSE17301_CTRL_VS_48H_ACD3_A<br>CD28_IFNA5_STIM_CD8_TCELL_D<br>N                | 19 | -     | 0.402  | -2.068 | 0.0084 | 0.016 | 0.985 | 340                                  | tags=74%,<br>list=35%,<br>signal=111% |
| 199 | GSE22886_NAIVE_BCELL_VS_BLO<br>OD_PLASMA_CELL_DN                               | 21 | -     | 0.383  | -2.067 | 0.002  | 0.016 | 0.986 | 309                                  | tags=67%,<br>list=32%,<br>signal=96%  |
| 200 | GSE369_SOCS3_KO_VS_IFNG_KO_<br>LIVER_DN                                        | 23 | -     | 0.377  | -2.065 | 0.0022 | 0.016 | 0.987 | 355                                  | tags=74%,<br>list=36%,<br>signal=114% |
| 201 | KAECH_DAY8_EFF_VS_DAY15_EF<br>F_CD8_TCELL_UP                                   | 29 | -     | 0.336  | -2.063 | 0.0043 | 0.016 | 0.987 | 407                                  | tags=76%,<br>list=42%,<br>signal=126% |
| 202 | GSE5099_UNSTIM_VS_MCSF_TRE<br>ATED_MONOCYTE_DAY7_UP                            | 15 | -     | 0.457  | -2.055 | 0.002  | 0.017 | 0.991 | 394                                  | tags=87%,<br>list=40%,<br>signal=143% |
| 203 | GSE360_L_DONOVANI_VS_T_GON<br>DII_MAC_DN                                       | 19 | -     | 0.406  | -2.048 | 0.0021 | 0.018 | 0.993 | 306                                  | tags=68%,<br>list=31%,<br>signal=98%  |
| 204 | GSE22033_WT_VS_PPARG_KO_ME<br>F_DN                                             | 19 | -     | 0.404  | -2.045 | 0.009  | 0.018 | 0.995 | 376                                  | tags=79%,<br>list=39%,<br>signal=126% |
| 205 | GSE22919_RESTING_VS_IL2_IL12_I<br>L15_STIM_NK_CELL_UP                          | 19 | -     | 0.394  | -2.042 | 0.0084 | 0.018 | 0.996 | 436                                  | tags=84%,<br>list=45%,<br>signal=149% |
| 206 | GSE3982_EOSINOPHIL_VS_TH2_D<br>N                                               | 21 | -     | 0.381  | -2.04  | 0.0044 | 0.018 | 0.996 | 347                                  | tags=71%,<br>list=36%,<br>signal=109% |
| 207 | GSE36891_UNSTIM_VS_PAM_TLR2<br>_STIM_PERITONEAL_MACROPHA<br>GE_UP              | 17 | -     | 0.426  | -2.032 | 0      | 0.019 | 0.998 | 240                                  | tags=65%,<br>list=25%,<br>signal=84%  |
| 208 | GSE3982_BCELL_VS_TH1_DN                                                        | 38 | -     | 0.296  | -2.031 | 0.0021 | 0.019 | 0.998 | 207                                  | tags=47%,<br>list=21%,<br>signal=58%  |
| 209 | GSE5542_IFNA_VS_IFNA_AND_IFN<br>G_TREATED_EPITHELIAL_CELLS_<br>24H_DN          | 21 | -     | 0.392  | -2.016 | 0.0042 | 0.021 | 0.999 | 301                                  | tags=67%,<br>list=31%,<br>signal=94%  |
| 210 | GSE21670_STAT3_KO_VS_WT_CD4<br>_TCELL_TGFB_TREATED_UP                          | 18 | -     | 0.409  | -2.015 | 0.0043 | 0.021 | 0.999 | 323                                  | tags=72%,<br>list=33%,<br>signal=106% |

|     |                                                                          |    |   |       |        |        |       |       |     |                                       |
|-----|--------------------------------------------------------------------------|----|---|-------|--------|--------|-------|-------|-----|---------------------------------------|
| 211 | GSE33162 UNTREATED_VS_4H_LP<br>S_STIM_HDAC3_KO_MACROPHAG<br>E_UP         | 33 | - | 0.305 | -2.012 | 0.007  | 0.021 | 0.999 | 301 | tags=61%,<br>list=31%,<br>signal=85%  |
| 212 | GSE15271 CXCR4_POS_VS_NEG_G<br>C_BCELL_UP                                | 17 | - | 0.421 | -2.01  | 0.0045 | 0.021 | 0.999 | 407 | tags=82%,<br>list=42%,<br>signal=139% |
| 213 | GSE25088 WT_VS_STAT6_KO_MA<br>CROPHAGE_ROSIGLITAZONE_AN<br>D_IL4_STIM_UP | 16 | - | 0.434 | -2.009 | 0.0065 | 0.021 | 0.999 | 276 | tags=69%,<br>list=28%,<br>signal=94%  |
| 214 | GSE17721 POLYIC_VS_PAM3CSK4<br>_16H_BMDC_DN                              | 20 | - | 0.392 | -2.008 | 0      | 0.021 | 0.999 | 267 | tags=65%,<br>list=27%,<br>signal=88%  |
| 215 | GSE13547 CTRL_VS_ANTI_IGM_S<br>TIM_ZFX_KO_BCELL_2H_UP                    | 36 | - | 0.304 | -2.006 | 0.0067 | 0.022 | 0.999 | 354 | tags=67%,<br>list=36%,<br>signal=101% |
| 216 | GSE27786 LSK_VS_NKTCELL_UP                                               | 19 | - | 0.407 | -2.005 | 0.0087 | 0.022 | 0.999 | 195 | tags=58%,<br>list=20%,<br>signal=71%  |
| 217 | GSE32986 GMCSF_VS_GMCSF_AN<br>D_CURDLAN_LOWDOSE_STIM_D<br>C_UP           | 28 | - | 0.336 | -1.997 | 0.0111 | 0.023 | 0.999 | 354 | tags=68%,<br>list=36%,<br>signal=104% |
| 218 | GSE40068 BCL6_POS_VS_NEG_CX<br>CR5_POS_TFH_UP                            | 22 | - | 0.364 | -1.989 | 0.0023 | 0.023 | 0.999 | 263 | tags=59%,<br>list=27%,<br>signal=79%  |
| 219 | GSE30962 PRIMARY_VS_SECOND<br>ARY_CHRONIC_LCMV_INF_CD8_T<br>CELL_UP      | 20 | - | 0.387 | -1.988 | 0.0066 | 0.024 | 0.999 | 445 | tags=85%,<br>list=46%,<br>signal=153% |
| 220 | GSE10239 NAIVE_VS_MEMORY_C<br>D8_TCELL_UP                                | 16 | - | 0.431 | -1.987 | 0.0065 | 0.024 | 0.999 | 372 | tags=81%,<br>list=38%,<br>signal=129% |
| 221 | GSE2770 TGFB_AND_IL4_VS_IL4<br>TREATED_ACT_CD4_TCELL_2H_D<br>N           | 16 | - | 0.432 | -1.984 | 0      | 0.024 | 0.999 | 335 | tags=75%,<br>list=34%,<br>signal=112% |
| 222 | GSE3039 ALPHAALPHA_CD8_TCE<br>LL_VS_B1_BCELL_DN                          | 26 | - | 0.341 | -1.975 | 0.0082 | 0.025 | 1     | 176 | tags=50%,<br>list=18%,<br>signal=59%  |
| 223 | GSE34205 HEALTHY_VS_RSV_INF<br>_INFANT_PBMC_DN                           | 15 | - | 0.444 | -1.973 | 0.0042 | 0.025 | 1     | 369 | tags=80%,<br>list=38%,<br>signal=127% |
| 224 | GSE10239 NAIVE_VS_KLRG1INT_<br>EFF_CD8_TCELL_DN                          | 27 | - | 0.337 | -1.972 | 0.0023 | 0.025 | 1     | 386 | tags=74%,<br>list=40%,<br>signal=119% |
| 225 | GSE22432 MULTIPOTENT_PROGE<br>NITOR_VS_CDC_DN                            | 18 | - | 0.396 | -1.964 | 0.0066 | 0.026 | 1     | 376 | tags=78%,<br>list=39%,<br>signal=124% |
| 226 | GSE17721_0.5H_VS_4H_POLYIC_B<br>MDC_UP                                   | 15 | - | 0.436 | -1.964 | 0.0065 | 0.026 | 1     | 467 | tags=93%,<br>list=48%,<br>signal=177% |
| 227 | GSE22886_DAY0_VS_DAY7_MONO<br>CYTE_IN_CULTURE_DN                         | 26 | - | 0.331 | -1.962 | 0.0086 | 0.027 | 1     | 308 | tags=62%,<br>list=32%,<br>signal=88%  |
| 228 | GSE32986 UNSTIM_VS_CURDLAN<br>_LOWDOSE_STIM_DC_DN                        | 29 | - | 0.318 | -1.961 | 0.009  | 0.027 | 1     | 221 | tags=52%,<br>list=23%,<br>signal=65%  |
| 229 | GSE9006 HEALTHY_VS_TYPE_1_D<br>IABETES_PBMC_1MONTH_POST_<br>DX_UP        | 26 | - | 0.335 | -1.96  | 0.0108 | 0.027 | 1     | 427 | tags=77%,<br>list=44%,<br>signal=133% |
| 230 | GSE17721_CTRL_VS_CPG_0.5H_B<br>MDC_UP                                    | 19 | - | 0.388 | -1.96  | 0.0022 | 0.027 | 1     | 405 | tags=79%,<br>list=42%,<br>signal=133% |

|     |                                                                                 |    |       |        |        |       |   |     |                                        |
|-----|---------------------------------------------------------------------------------|----|-------|--------|--------|-------|---|-----|----------------------------------------|
| 231 | GSE17301_ACD3_ACD28_VS_ACD3_ACD28_AND_IFNA5_STIM_CD8_TCELL_UP                   | 25 | 0.348 | -1.958 | 0.0044 | 0.027 | 1 | 290 | tags=60%,<br>list=30%,<br>signal=83%   |
| 232 | GSE17974_0H_VS_6H_IN_VITRO_ACT_CD4_TCELL_DN                                     | 16 | 0.428 | -1.957 | 0.0042 | 0.027 | 1 | 177 | tags=56%,<br>list=18%,<br>signal=68%   |
| 233 | GSE20754_WT_VS_TCF1_KO_MEMORY_CD8_TCELL_DN                                      | 16 | -0.42 | -1.952 | 0.0088 | 0.028 | 1 | 124 | tags=50%,<br>list=13%,<br>signal=56%   |
| 234 | GSE19888_ADENOSINE_A3R_ACT_VS_A3R_ACT_WITH_A3R_INH_PRETREATMENT_IN_MAST_CELL_UP | 17 | 0.413 | -1.951 | 0.0062 | 0.028 | 1 | 470 | tags=88%,<br>list=48%,<br>signal=168%  |
| 235 | GSE360_HIGH_VS_LOW_DOSE_BMALAYI_DC_UP                                           | 15 | 0.422 | -1.942 | 0.0065 | 0.029 | 1 | 405 | tags=80%,<br>list=42%,<br>signal=135%  |
| 236 | GSE3982_NEUTROPHIL_VS_TH1_DN                                                    | 20 | 0.381 | -1.938 | 0.0066 | 0.03  | 1 | 386 | tags=75%,<br>list=40%,<br>signal=122%  |
| 237 | GSE360_L_MAJOR_VS_T_GONDII_MAC_DN                                               | 21 | 0.374 | -1.932 | 0.0089 | 0.03  | 1 | 187 | tags=52%,<br>list=19%,<br>signal=63%   |
| 238 | GSE22432_CDC_VS_COMMON_DC_PROGENITOR_DN                                         | 22 | 0.353 | -1.929 | 0.0064 | 0.031 | 1 | 216 | tags=55%,<br>list=22%,<br>signal=69%   |
| 239 | GSE5589_WT_VS_IL10_KO_LPS_STIM_MACROPHAGE_45MIN_UP                              | 16 | 0.416 | -1.928 | 0.0063 | 0.031 | 1 | 176 | tags=56%,<br>list=18%,<br>signal=68%   |
| 240 | GSE20152_SPHK1_KO_VS_WT_HTNFA_OVERXPRESS_ANKLE_DN                               | 18 | 0.388 | -1.925 | 0.0106 | 0.031 | 1 | 389 | tags=78%,<br>list=40%,<br>signal=127%  |
| 241 | GSE39110_UNTREATED_VS_IL2_TREATED_CD8_TCELL_DAY3_POSTIMMUNIZATION_DN            | 18 | 0.389 | -1.924 | 0.0143 | 0.031 | 1 | 290 | tags=67%,<br>list=30%,<br>signal=93%   |
| 242 | GSE5142_HTERT_TRANSDUCE_VS_CTRL_CD8_TCELL_LATE_PASSAGE_CLONE_UP                 | 24 | 0.334 | -1.924 | 0.0147 | 0.031 | 1 | 347 | tags=67%,<br>list=36%,<br>signal=101%  |
| 243 | GSE24634_TREG_VS_TCONV_POST_DAY10_IL4_CONVERSION_UP                             | 42 | 0.263 | -1.924 | 0.0121 | 0.031 | 1 | 125 | tags=33%,<br>list=13%,<br>signal=37%   |
| 244 | GSE12198_NK_VS_NK_ACT_EXPANSION_SYSTEM_DERIVED_NK_CELL_DN                       | 16 | 0.405 | -1.91  | 0.0022 | 0.034 | 1 | 302 | tags=69%,<br>list=31%,<br>signal=98%   |
| 245 | GSE1432_CTRL_VS_IFNG_6H_MICROGLIA_UP                                            | 21 | 0.363 | -1.906 | 0.0135 | 0.034 | 1 | 629 | tags=100%,<br>list=65%,<br>signal=276% |
| 246 | GSE10273_LOW_IL7_VS_HIGH_IL7_AND_IRF4_IN_IRF4_8_NULL_PREBCELL_UP                | 19 | 0.386 | -1.905 | 0.0042 | 0.034 | 1 | 228 | tags=58%,<br>list=23%,<br>signal=74%   |
| 247 | GSE12845_IGD_POS_BLOOD_VS_DARKZONE_GC_TONSIL_BCELL_DN                           | 24 | 0.332 | -1.905 | 0.0139 | 0.034 | 1 | 367 | tags=71%,<br>list=38%,<br>signal=111%  |
| 248 | GSE36095_WT_VS_HDAC9_KO_TREG_UP                                                 | 19 | 0.374 | -1.903 | 0.0112 | 0.034 | 1 | 91  | tags=42%,<br>list=9%,<br>signal=46%    |
| 249 | GSE9988_LPS_VS_LPS_AND_ANTI_TREMI_MONOCYTE_DN                                   | 21 | 0.359 | -1.899 | 0.0044 | 0.035 | 1 | 250 | tags=57%,<br>list=26%,<br>signal=75%   |
| 250 | GSE3039_CD4_TCELL_VS_NKT_CELL_DN                                                | 21 | 0.356 | -1.898 | 0.0066 | 0.035 | 1 | 398 | tags=76%,<br>list=41%,<br>signal=126%  |

|     |                                                                               |    |   |       |        |        |       |   |     |                                       |
|-----|-------------------------------------------------------------------------------|----|---|-------|--------|--------|-------|---|-----|---------------------------------------|
| 251 | GSE12392_WT_VS_IFNB_KO_CD8A<br>_NEG_SPLEEN_DC_UP                              | 15 | - | 0.418 | -1.897 | 0.0085 | 0.035 | 1 | 321 | tags=73%,<br>list=33%,<br>signal=108% |
| 252 | GSE2770_IL12_VS_IL4_TREATED_<br>ACT_CD4_TCELL_48H_UP                          | 18 | - | 0.383 | -1.894 | 0.0115 | 0.036 | 1 | 286 | tags=67%,<br>list=29%,<br>signal=93%  |
| 253 | GSE17721_LPS_VS_GARDIQUIMO<br>D_24H_BMDC_DN                                   | 21 | - | 0.351 | -1.882 | 0.0066 | 0.038 | 1 | 356 | tags=71%,<br>list=37%,<br>signal=110% |
| 254 | GSE24574_BCL6_LOW_TFH_VS_TC<br>ONV_CD4_TCELL_UP                               | 23 | - | 0.344 | -1.881 | 0.0104 | 0.038 | 1 | 184 | tags=48%,<br>list=19%,<br>signal=58%  |
| 255 | GSE22432_CONVENTIONAL_CDC_<br>VS_PLASMACYTOID_PDC_UP                          | 20 | - | 0.366 | -1.88  | 0.0173 | 0.038 | 1 | 407 | tags=80%,<br>list=42%,<br>signal=135% |
| 256 | GSE1460_CD4_THYMOCYTE_VS_N<br>AIVE_CD4_TCELL_CORD_BLOOD_<br>UP                | 24 | - | 0.337 | -1.88  | 0.0133 | 0.038 | 1 | 398 | tags=75%,<br>list=41%,<br>signal=124% |
| 257 | GSE24634_TEFF_VS_TCONV_DAY1<br>0_IN_CULTURE_UP                                | 39 | - | 0.275 | -1.88  | 0.0064 | 0.038 | 1 | 334 | tags=59%,<br>list=34%,<br>signal=86%  |
| 258 | GSE29614_DAY3_VS_DAY7_TIV_F<br>LU_VACCINE_PBMC_DN                             | 34 | - | 0.284 | -1.873 | 0.0116 | 0.039 | 1 | 300 | tags=59%,<br>list=31%,<br>signal=82%  |
| 259 | GSE11961_GERMINAL_CENTER_B<br>CELL_DAY7_VS_GERMINAL_CEN<br>TER_BCELL_DAY40_UP | 17 | - | 0.397 | -1.872 | 0.0064 | 0.04  | 1 | 228 | tags=78%,<br>list=23%,<br>signal=75%  |
| 260 | GSE7568_IL4_VS_IL4_AND_DEXA<br>METHASONE_TREATED_MACROP<br>HAGE_UP            | 18 | - | -0.38 | -1.856 | 0.0186 | 0.043 | 1 | 394 | tags=78%,<br>list=40%,<br>signal=128% |
| 261 | GSE1925_3H_VS_24H_IFNG_STIM_<br>IFNG_PRIMED_MACROPHAGE_DN                     | 22 | - | 0.339 | -1.855 | 0.0166 | 0.043 | 1 | 240 | tags=55%,<br>list=25%,<br>signal=71%  |
| 262 | GSE3982_EOSINOPHIL_VS_MAC_D<br>N                                              | 22 | - | 0.344 | -1.844 | 0.0182 | 0.046 | 1 | 356 | tags=68%,<br>list=37%,<br>signal=105% |
| 263 | GSE40274_CTRL_VS_FOXP3_AND_<br>HELIOS_TRANSDUCED_ACTIVAT<br>ED_CD4_TCELL_DN   | 18 | - | 0.379 | -1.842 | 0.0111 | 0.046 | 1 | 356 | tags=72%,<br>list=37%,<br>signal=112% |
| 264 | GSE40225_WT_VS_RIP_B7X_DIAB<br>ETIC_MOUSE_PANCREATIC_CD8_<br>TCELL_DN         | 19 | - | -0.36 | -1.832 | 0.0151 | 0.048 | 1 | 372 | tags=74%,<br>list=38%,<br>signal=117% |
| 265 | GSE30962_ACUTE_VS_CHRONIC_L<br>CMV_PRIMARY_INF_CD8_TCELL_<br>DN               | 33 | - | 0.284 | -1.829 | 0.0203 | 0.049 | 1 | 172 | tags=42%,<br>list=18%,<br>signal=50%  |
| 266 | GSE17186_CD21LOW_VS_CD21HIG<br>H_TRANSITIONAL_BCELL_UP                        | 28 | - | 0.302 | -1.829 | 0.0114 | 0.049 | 1 | 290 | tags=57%,<br>list=30%,<br>signal=79%  |

There is 974 DSGs(differential expressed genes) between the low risk and high risk groups which stratified by the  $\gamma\delta$  T signature in LCI cohorts data.

All the data were ranked by the value of FDR q and the creteria was seted to  $FDR \leq 0.05$

**Table S3: The  $\gamma\delta$  T cell weight can be computed by the simple formula  $\sum_i w_i x_i + 1.217799$  where  $w_i$  and  $x_i$  are the weight and logged gene expression for the  $i$ -th gene.**

|    | Gene ID | Weights ( $w_i$ ) |    | Gene ID  | Weights ( $w_i$ ) |
|----|---------|-------------------|----|----------|-------------------|
| 1  | KLRB1   | -0.00383          | 29 | LHCGR    | 0.001499          |
| 2  | IL2RB   | -0.012958         | 30 | LAT      | -0.010682         |
| 3  | PVRIG   | -0.011589         | 31 | GPR18    | -0.00283          |
| 4  | VNN2    | 0.15576           | 32 | MAGEA11  | 0.000507          |
| 5  | KLRK1   | -0.032773         | 33 | CD3D     | 0.001048          |
| 6  | CCR5    | -0.014818         | 34 | COLQ     | -0.002815         |
| 7  | CD2     | -0.015428         | 35 | GZMH     | -0.017201         |
| 8  | GZMA    | -0.025291         | 36 | KRT18P50 | 0.002928          |
| 9  | KLRD1   | -0.006226         | 37 | ZNF442   | -0.00681          |
| 10 | LCK     | -0.013979         | 38 | CD244    | -0.003936         |
| 11 | CXCR6   | -0.003706         | 39 | CD8A     | -0.035665         |
| 12 | BFSP1   | -0.001732         | 40 | SIRPG    | -0.007609         |
| 13 | GZMK    | -0.020927         | 41 | DUSP2    | -0.008552         |
| 14 | LY9     | -0.005345         | 42 | SIT1     | -0.008502         |
| 15 | GNLY    | -0.008928         | 43 | CD3G     | -0.007377         |
| 16 | GZMM    | -0.001279         | 44 | MAP4K1   | -0.007469         |
| 17 | SCN9A   | 0.005706          | 45 | CD8B     | -0.007206         |
| 18 | IL18RAP | -0.004272         | 46 | PLEKHG3  | -0.004568         |
| 19 | PRF1    | -0.021787         | 47 | GYPE     | 7.3e-05           |
| 20 | CDH12   | 0.008811          | 48 | LAG3     | -0.00631          |
| 21 | CST7    | -0.02182          | 49 | GFI1     | -0.003283         |
| 22 | CD247   | -0.010122         | 50 | SKAP1    | -0.022025         |
| 23 | UBASH3A | -0.004547         | 51 | CD300A   | -0.001107         |
| 24 | CD160   | -0.007497         | 52 | TCF7     | -0.009199         |
| 25 | KLRG1   | -0.001971         | 53 | BRSK2    | -0.001827         |
| 26 | GZMB    | -0.018684         | 54 | SH2D1A   | -0.005153         |
| 27 | GPR171  | -0.010435         | 55 | PTGDR    | 0.000706          |
| 28 | CCL5    | -0.035495         |    |          |                   |

**Table S4: Correlation between the  $\gamma\delta$  T cells and the chemokines or their receptors in LCI cohort.**

| Chemokines  |           |                | Chemokine Receptors |          |                |
|-------------|-----------|----------------|---------------------|----------|----------------|
|             | <i>r</i>  | <i>P</i> value |                     | <i>r</i> | <i>P</i> value |
| CCL5        | 0.6235    | <0.0001        | CCR5                | 0.5185   | <0.0001        |
| CCL4        | 0.4605    | <0.0001        | CXCR6               | 0.4511   | <0.0001        |
| CXCL9       | 0.4504    | <0.0001        | CCR7                | 0.3573   | <0.0001        |
| CXCL13      | 0.4184    | <0.0001        | CCR1                | 0.3157   | <0.0001        |
| CXCL11      | 0.3892    | <0.0001        | CCR2                | 0.3148   | <0.0001        |
| CXCL10      | 0.3699    | <0.0001        | CXCR3               | 0.2512   | <0.0001        |
| CCL8        | 0.3325    | <0.0001        | CX3CR1              | 0.2232   | 0.0005         |
| CCL19       | 0.2941    | <0.0001        | CXCR4               | 0.1967   | 0.0022         |
| CCL21       | 0.2897    | <0.0001        | CXCR5               | 0.1926   | 0.0027         |
| CXCL12      | 0.289     | <0.0001        | CCR3                | 0.09146  | 0.1578         |
| CCL3        | 0.2808    | <0.0001        | CCR8                | 0.07331  | 0.2579         |
| CX3CL1      | 0.2672    | <0.0001        | IL8RA(CXCR1)        | 0.05011  | 0.4397         |
| CCL18       | 0.2545    | <0.0001        | CCR4                | 0.02259  | 0.7277         |
| CCL2        | 0.2416    | 0.0002         | CCR6                | -0.02763 | 0.6702         |
| CXCL14      | 0.2401    | 0.0002         | IL8RB(CXCR2)        | -0.03258 | 0.6156         |
| CCL14       | 0.2058    | 0.0013         | XCR1                | -0.03309 | 0.61           |
| IL8(CXCL8)  | 0.1563    | 0.0154         | CCR10               | -0.0616  | 0.342          |
| PPBP(CXCL7) | 0.1387    | 0.0317         | CCR9                | -0.1187  | 0.0663         |
| CCL1        | 0.1314    | 0.042          | CXCR7               | -0.1493  | 0.0207         |
| CCL25       | 0.1259    | 0.0514         |                     |          |                |
| CCL11       | 0.1194    | 0.0648         |                     |          |                |
| PF4(CXCL4)  | 0.1003    | 0.1211         |                     |          |                |
| CCL13       | 0.09973   | 0.1234         |                     |          |                |
| CCL17       | 0.08401   | 0.1946         |                     |          |                |
| CCL23       | 0.07508   | 0.2466         |                     |          |                |
| CCL24       | 0.05246   | 0.4185         |                     |          |                |
| CCL22       | 0.04932   | 0.447          |                     |          |                |
| CCL7        | 0.04469   | 0.4907         |                     |          |                |
| CCL16       | -0.004409 | 0.9458         |                     |          |                |
| CXCL2       | -0.006015 | 0.9261         |                     |          |                |
| CXCL3       | -0.105    | 0.1047         |                     |          |                |
| CXCL6       | -0.1122   | 0.0827         |                     |          |                |
| CCL15       | -0.1138   | 0.0786         |                     |          |                |
| CXCL1       | -0.1474   | 0.0223         |                     |          |                |
| CCL27       | -0.1679   | 0.0091         |                     |          |                |
| CXCL5       | -0.2441   | 0.0001         |                     |          |                |
| CCL20       | -0.254    | <0.0001        |                     |          |                |

**Table S5. Correlation between the  $\gamma\delta$  T cells and chemokines or their receptors in TCGA cohort.**

| Chemokines |          |         | Chemokine Receptors |        |         |
|------------|----------|---------|---------------------|--------|---------|
|            | r        | P value |                     | r      | P value |
| CCL5       | 0.8687   | <0.0001 | CXCR3               | 0.7946 | <0.0001 |
| CCL4       | 0.7357   | <0.0001 | CXCR6               | 0.7773 | <0.0001 |
| CXCL9      | 0.686    | <0.0001 | CCR5                | 0.7632 | <0.0001 |
| CCL3       | 0.5749   | <0.0001 | CCR7                | 0.6674 | <0.0001 |
| CXCL11     | 0.5656   | <0.0001 | CXCR5               | 0.6371 | <0.0001 |
| CCL22      | 0.5487   | <0.0001 | CCR2                | 0.5749 | <0.0001 |
| CCL19      | 0.5451   | <0.0001 | CXCR4               | 0.5574 | <0.0001 |
| CCL8       | 0.5269   | <0.0001 | CCR1                | 0.5396 | <0.0001 |
| CCL18      | 0.5239   | <0.0001 | CCR4                | 0.4382 | <0.0001 |
| CXCL10     | 0.4746   | <0.0001 | CCR8                | 0.4147 | <0.0001 |
| CXCL14     | 0.4632   | <0.0001 | XCR1                | 0.4112 | <0.0001 |
| CCL17      | 0.4355   | <0.0001 | CCR6                | 0.2787 | <0.0001 |
| CCL2       | 0.433    | <0.0001 | CX3CR1              | 0.2542 | <0.0001 |
| CCL21      | 0.4317   | <0.0001 | CCR9                | 0.2474 | 0.0001  |
| CXCL12     | 0.4303   | <0.0001 | CXCR1               | 0.2057 | 0.0013  |
| CCL13      | 0.4101   | <0.0001 | CXCR2               | 0.1842 | 0.004   |
| CCL23      | 0.4069   | <0.0001 | CCR10               | 0.1702 | 0.008   |
| CXCL13     | 0.3644   | <0.0001 | CCR3                | 0.1563 | 0.0149  |
| CX3CL1     | 0.3386   | <0.0001 |                     |        |         |
| CCL24      | 0.2895   | <0.0001 |                     |        |         |
| CCL11      | 0.2797   | <0.0001 |                     |        |         |
| CXCL3      | 0.2174   | 0.0007  |                     |        |         |
| CCL14      | 0.2164   | 0.0007  |                     |        |         |
| CCL26      | 0.1962   | 0.0022  |                     |        |         |
| CXCL4      | 0.1584   | 0.0136  |                     |        |         |
| CCL7       | 0.139    | 0.0307  |                     |        |         |
| CXCL2      | 0.1383   | 0.0316  |                     |        |         |
| CXCL1      | 0.1317   | 0.0407  |                     |        |         |
| CXCL5      | 0.1289   | 0.0452  |                     |        |         |
| CXCL7      | 0.1277   | 0.0472  |                     |        |         |
| CXCL17     | 0.127    | 0.0484  |                     |        |         |
| CCL1       | 0.1156   | 0.0725  |                     |        |         |
| CXCL16     | 0.1148   | 0.0747  |                     |        |         |
| CXCL8      | 0.07347  | 0.2549  |                     |        |         |
| CXCL6      | 0.06494  | 0.3144  |                     |        |         |
| CCL27      | 0.03759  | 0.5606  |                     |        |         |
| CCL20      | 0.0296   | 0.6468  |                     |        |         |
| CCL28      | -0.02245 | 0.7283  |                     |        |         |
| CCL25      | -0.04865 | 0.4513  |                     |        |         |
| CCL16      | -0.05194 | 0.4212  |                     |        |         |
| CCL15      | -0.12    | 0.0624  |                     |        |         |
